# Supplementary material for: Associations of Adiposity, Circulating Protein Biomarkers, and Risk of Major Vascular Diseases
Source: PubMed Central journal article supplement (PMC7711564; doi:10.1001/jamacardio.2020.6041), 2020-12-02
Supplement: jamacardiol-e206041-s001.pdf [file jamacardiol-e206041-s001.pdf]

## Supplemental Online Content

Pang Y, Kartsonaki C, Lv J, et al. Associations of adiposity, circulating protein biomarkers, and risk of major vascular diseases. *JAMA Cardiol*. Published online December 2, 2020.  
doi:10.1001/jamacardio.2020.6041

**eFigure 1.** Genetic risk score (GRS) for BMI in CKB.

**eFigure 2.** Histograms of protein biomarkers.

**eFigure 3.** Correlation matrix of protein biomarkers.

**eFigure 4.** Observational associations of BMI with protein biomarkers and of protein biomarkers with CVD.

**eFigure 5.** Associations of BMI with 21 selected protein biomarkers.

**eFigure 6.** Global comparison of 1-SD differences of 90 protein biomarkers associated with 1-SD higher BMI versus other adiposity traits.

**eFigure 7.** Global comparison of 1-SD differences of 90 protein biomarkers associated with 1-SD higher observational BMI versus genetically elevated BMI.

**eFigure 8.** Meta-analysis of causal associations of BMI with selected protein biomarkers.

**eFigure 9.** Meta-analysis of genetic associations of BMI with proteins and of proteins with CVD.

**eFigure 10.** Associations of cis and trans SNP in relation to protein biomarkers and CVD.

**eFigure 11.** Colocalisation analysis of TWEAK, HGF, and ischaemic stroke.

**eFigure 12.** Genetic associations of BMI with proteomics comparing weighted and unweighted GRS.

**eFigure 13.** Genetic associations of BMI with proteomics using different external weights.

**eFigure 14.** Associations of BMI with proteomics by population subgroup.

**eFigure 15.** Observational associations of protein biomarkers with CVD.

**eFigure 16.** Causal associations of BMI and proteomics using different MR methods.

**eFigure 17.** Sensitivity analyses of genetic associations of BMI and proteomics in CKB.

**eFigure 18.** Central illustration of BMI, protein biomarkers, and risk of CVD.

**eFigure 19.** Internal and external controls.

**eFigure 20.** Assay specificity.

**eTable 1.** List of 92 proteomics quantified by the OLINK immuno-oncology assay.

**eTable 2.** Grouping of the 92 proteins measured by OLINK Immuno-Oncology assay.

**eTable 3.** Limit of detection and coefficient of variation of 92 protein biomarkers.

**eTable 4.** Genetic variants associated with BMI in the GIANT consortium.

**eTable 5.** Associations of potential confounders with BMI GRS.

**eTable 6.** Baseline characteristics of study participants by BMI in all CKB participants.

**eTable 7.** Associations of BMI with proteomics and of proteomics with CVD.

**eTable 8.** Genetic associations of MCP1, HGF, IL18, and TRAIL with risk of CVD.

**eTable 9.** P-values from the MR Steiger test.

**eTable 10.** Randomised controlled trials of anti-inflammatory therapy in CVD

**eTable 11.** Observational associations between BMI and proteins in CKB and the INTERVAL study.

**eMethods.**

**eReferences.**

**eTable 12.** SNPs that were used as instruments for selected protein biomarkers

**eTable 13.** Selected proteins, data sources, and calculation in meta-analysis and two-sample Mendelian randomisation

This supplemental material has been provided by the authors to give readers additional information about their work.



**eFigure 1. Genetic risk score (GRS) for BMI in CKB**

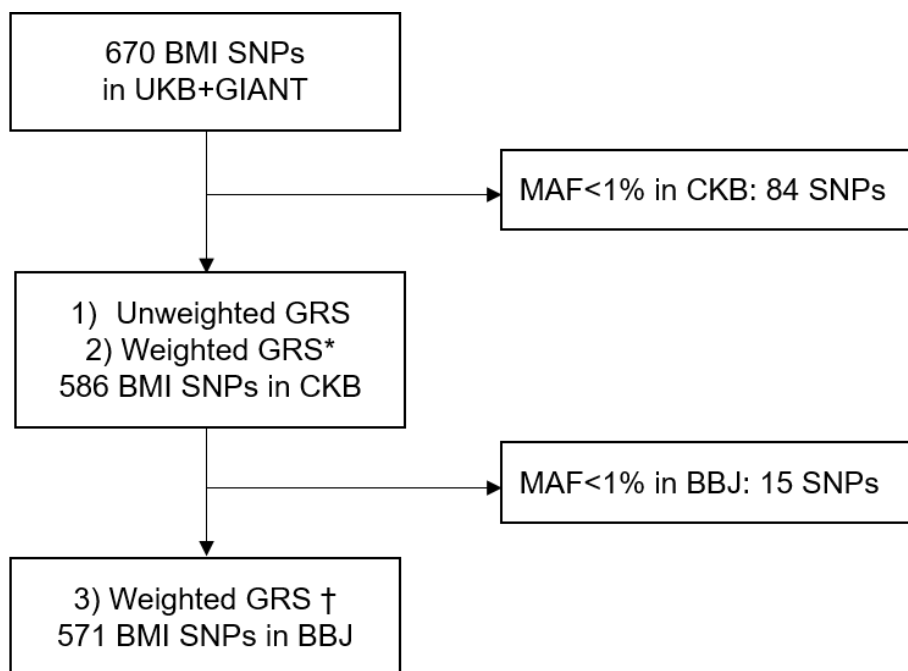

|                      | 1) Unweighted GRS | 2) Weighted GRS* | 3) Weighted GRS† |
|----------------------|-------------------|------------------|------------------|
| <b>No. SNPs</b>      | 586               | 586              | 571              |
| <b>R<sup>2</sup></b> | 1.10%             | 2.04%            | 2.06%            |
| <b>F-statistic</b>   | 1071              | 1577             | 1593             |

R<sup>2</sup> and F-statistic were calculated in 75,736 participants in the population subset.

\* External weights were taken from UKB+GIANT.

† External weights were taken from BBJ.

Proxy SNPs were identified for 5 SNPs unavailable in BBJ (in high linkage disequilibrium [ $R^2 \geq 0.8$ ] in CEU).

## eFigure 2. Histograms of protein biomarkers

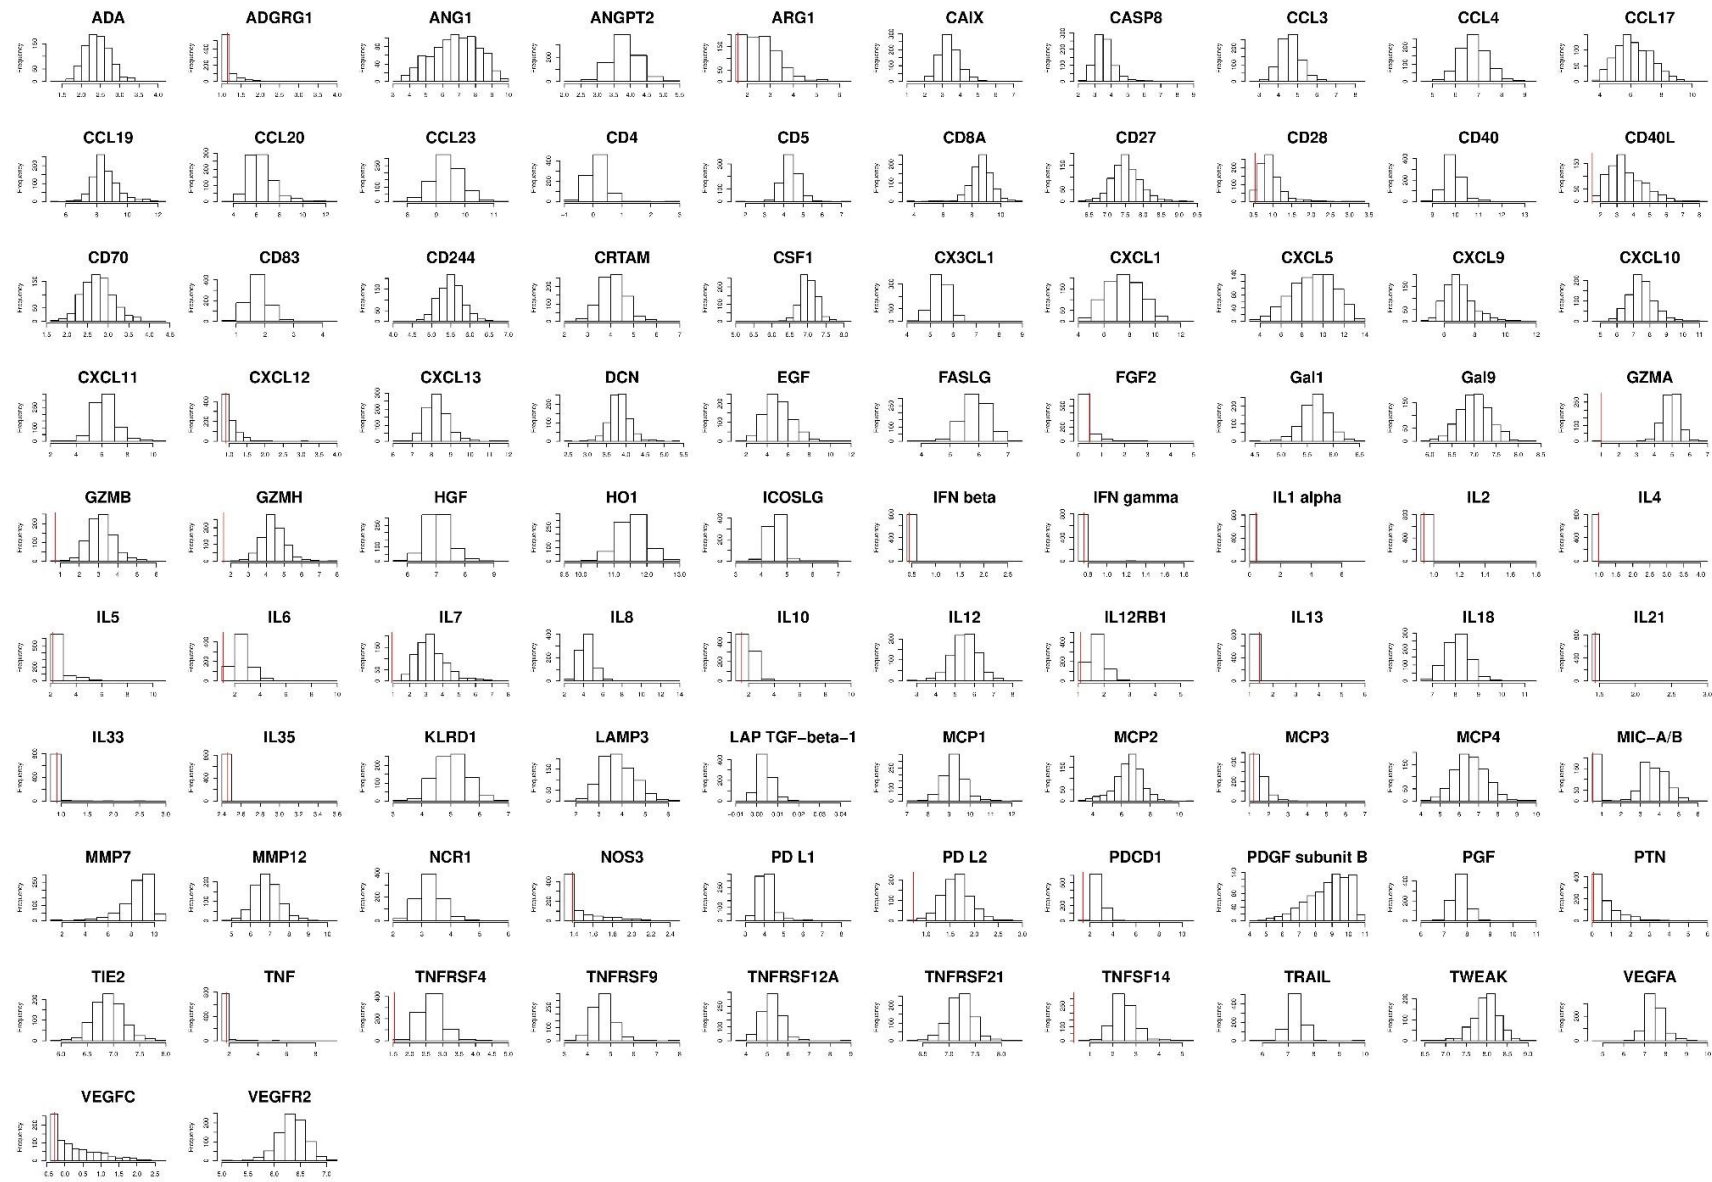

The red line denotes the LOD for individual proteins.

**eFigure 3. Correlation matrix of protein biomarkers**

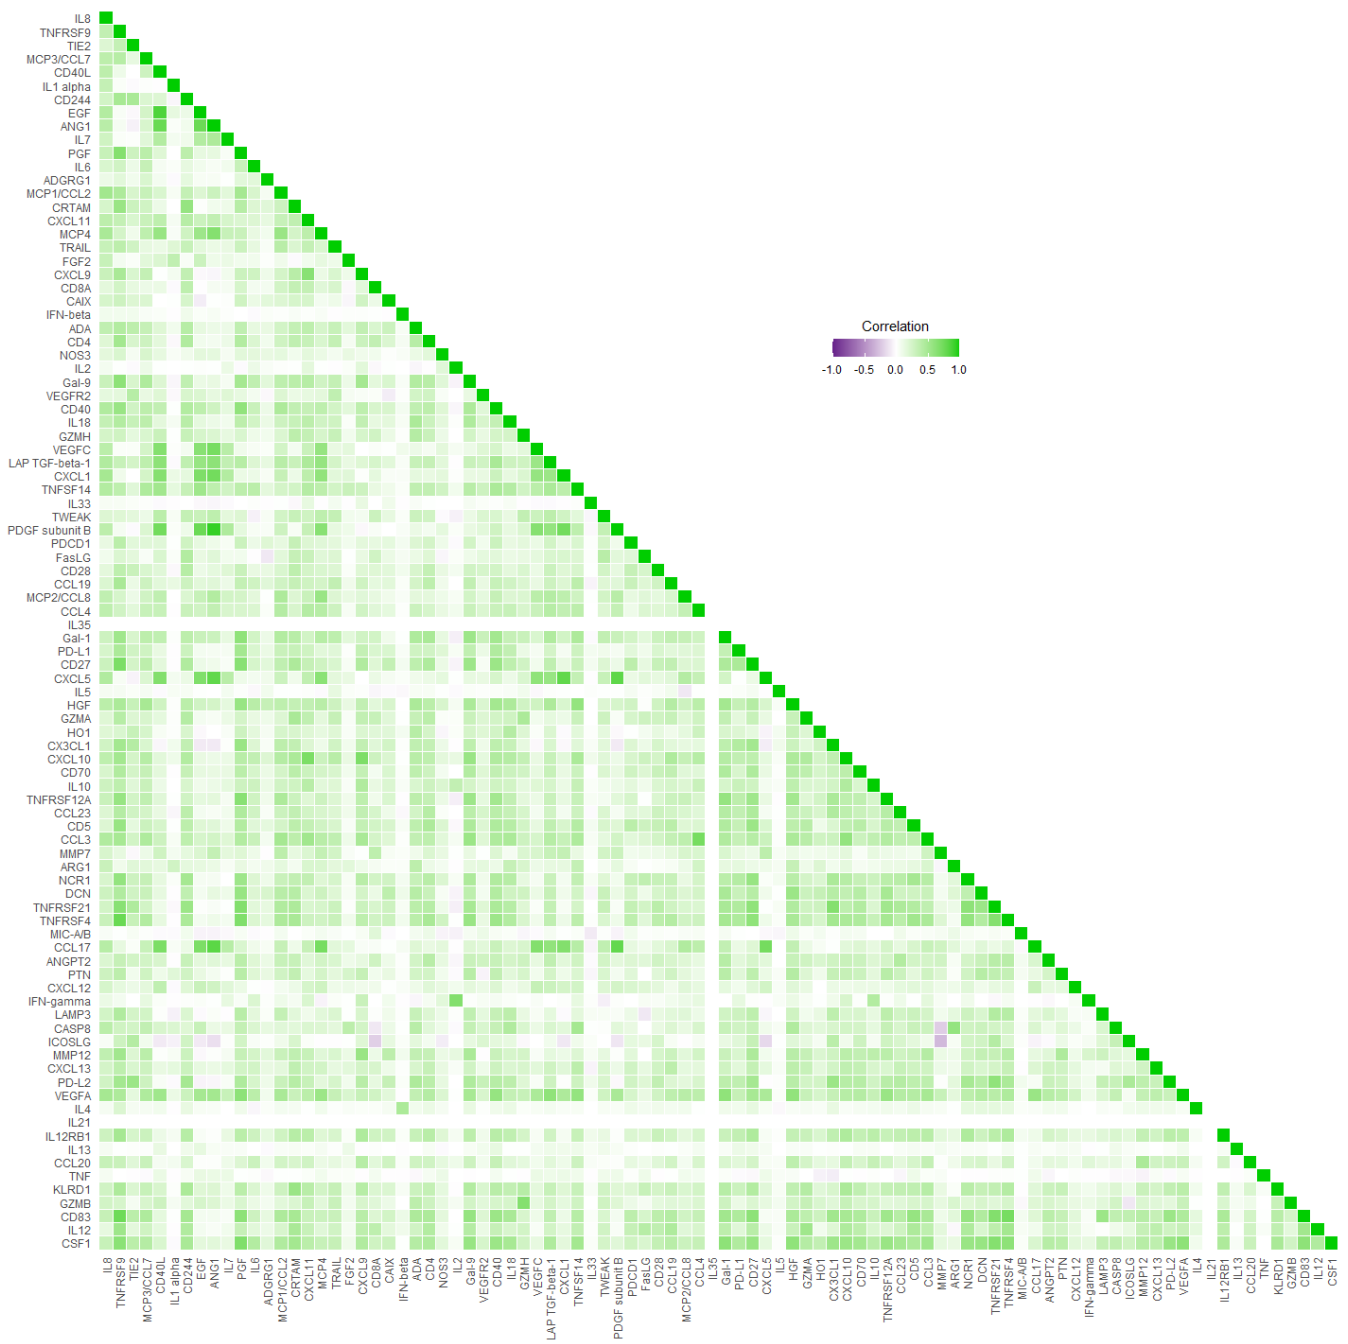

eFigure 4. Observational associations of BMI with protein biomarkers and of protein biomarkers with CVD

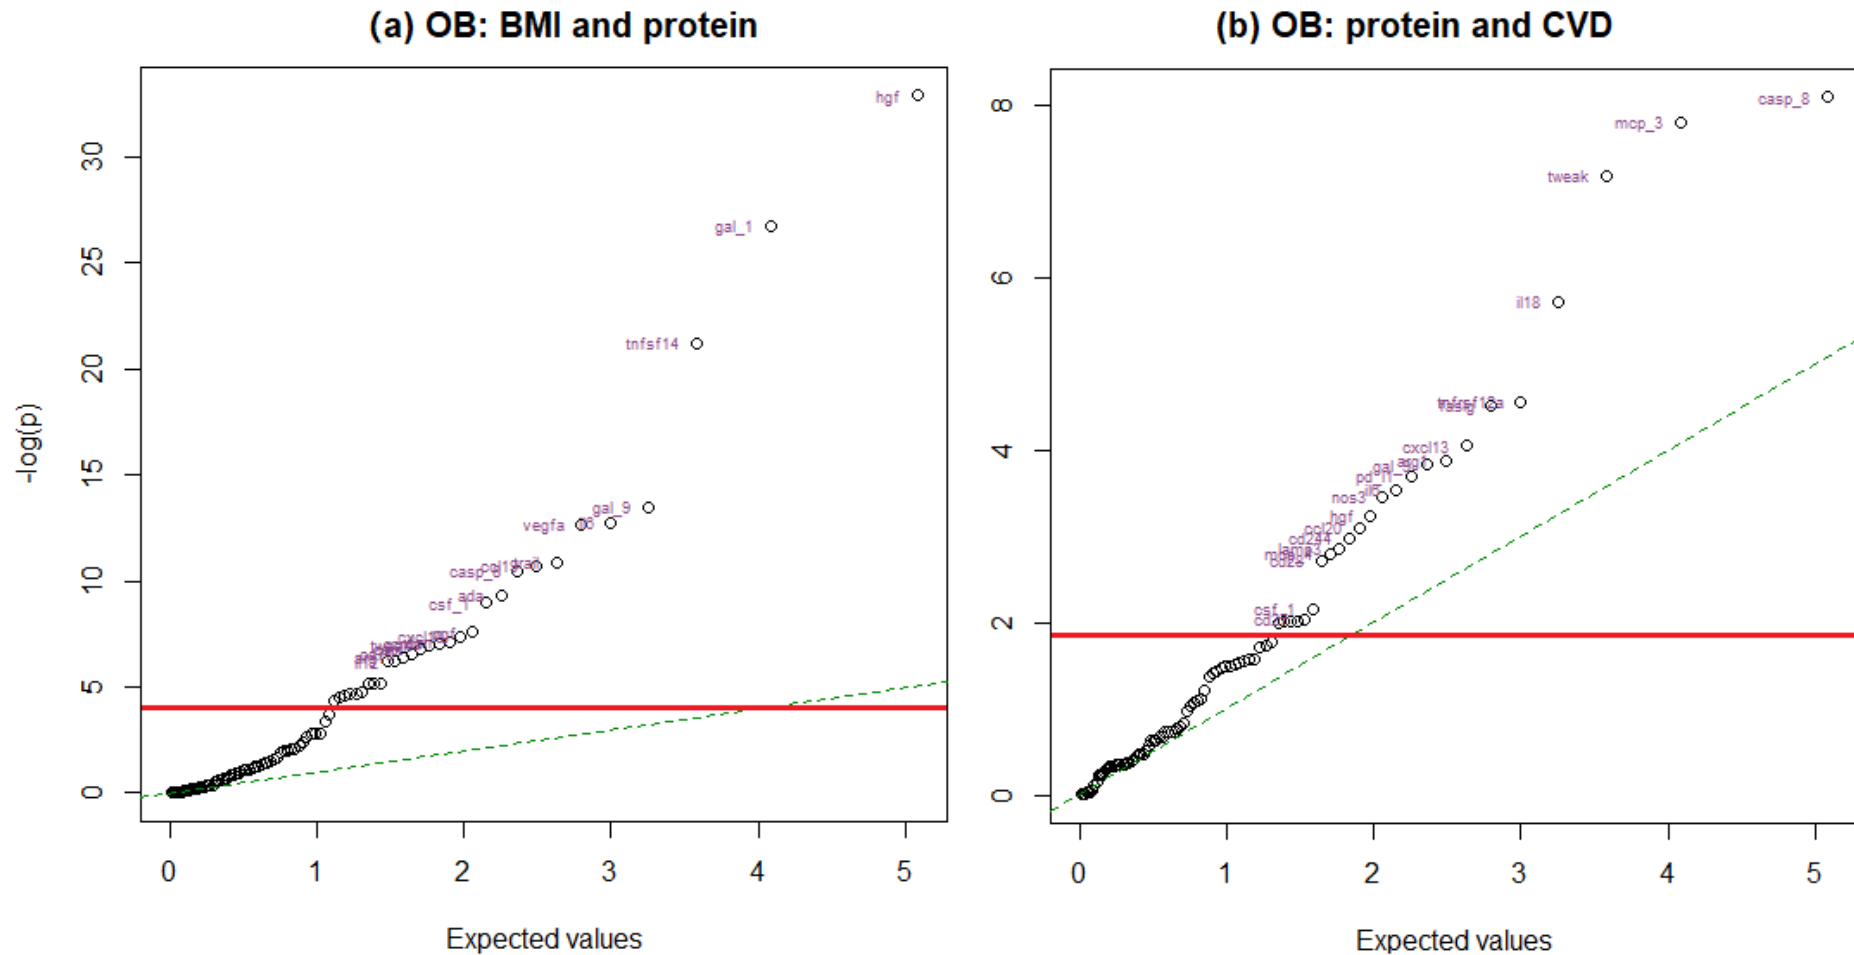

The isolation of protein biomarkers in the Rényi plot above the expected unit line suggests significant associations taking into account multiple testing. In both plots, the red line denotes the cut-off but its choice is somewhat subjective. Number of proteins above the cut-off:  $n=31$  in the left panel and  $n=23$  in the right panel.

## eFigure 5. Associations of BMI with 21 selected protein biomarkers

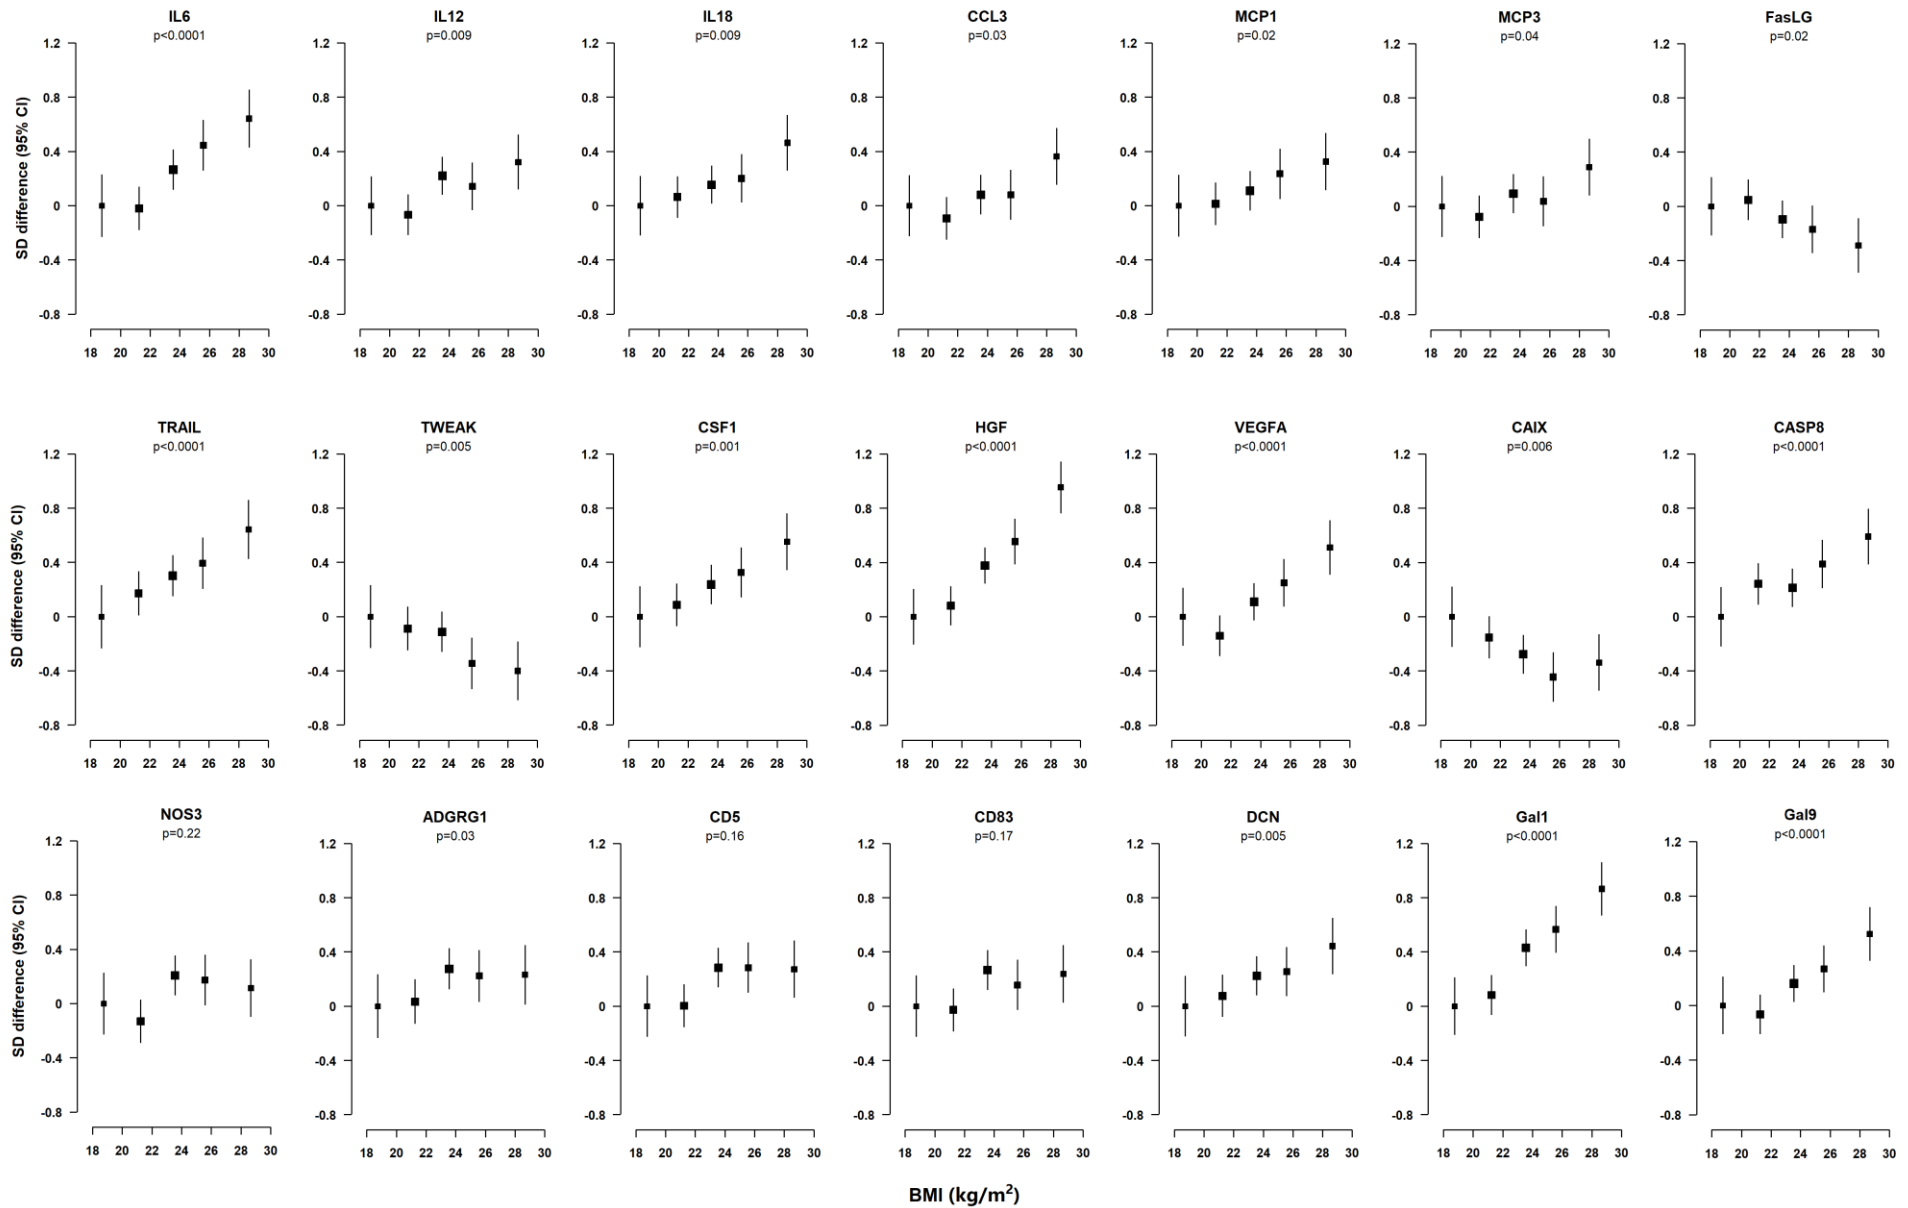

**eFigure 6. Global comparison of 1-SD differences of 90 protein biomarkers associated with 1-SD higher BMI versus other adiposity traits**

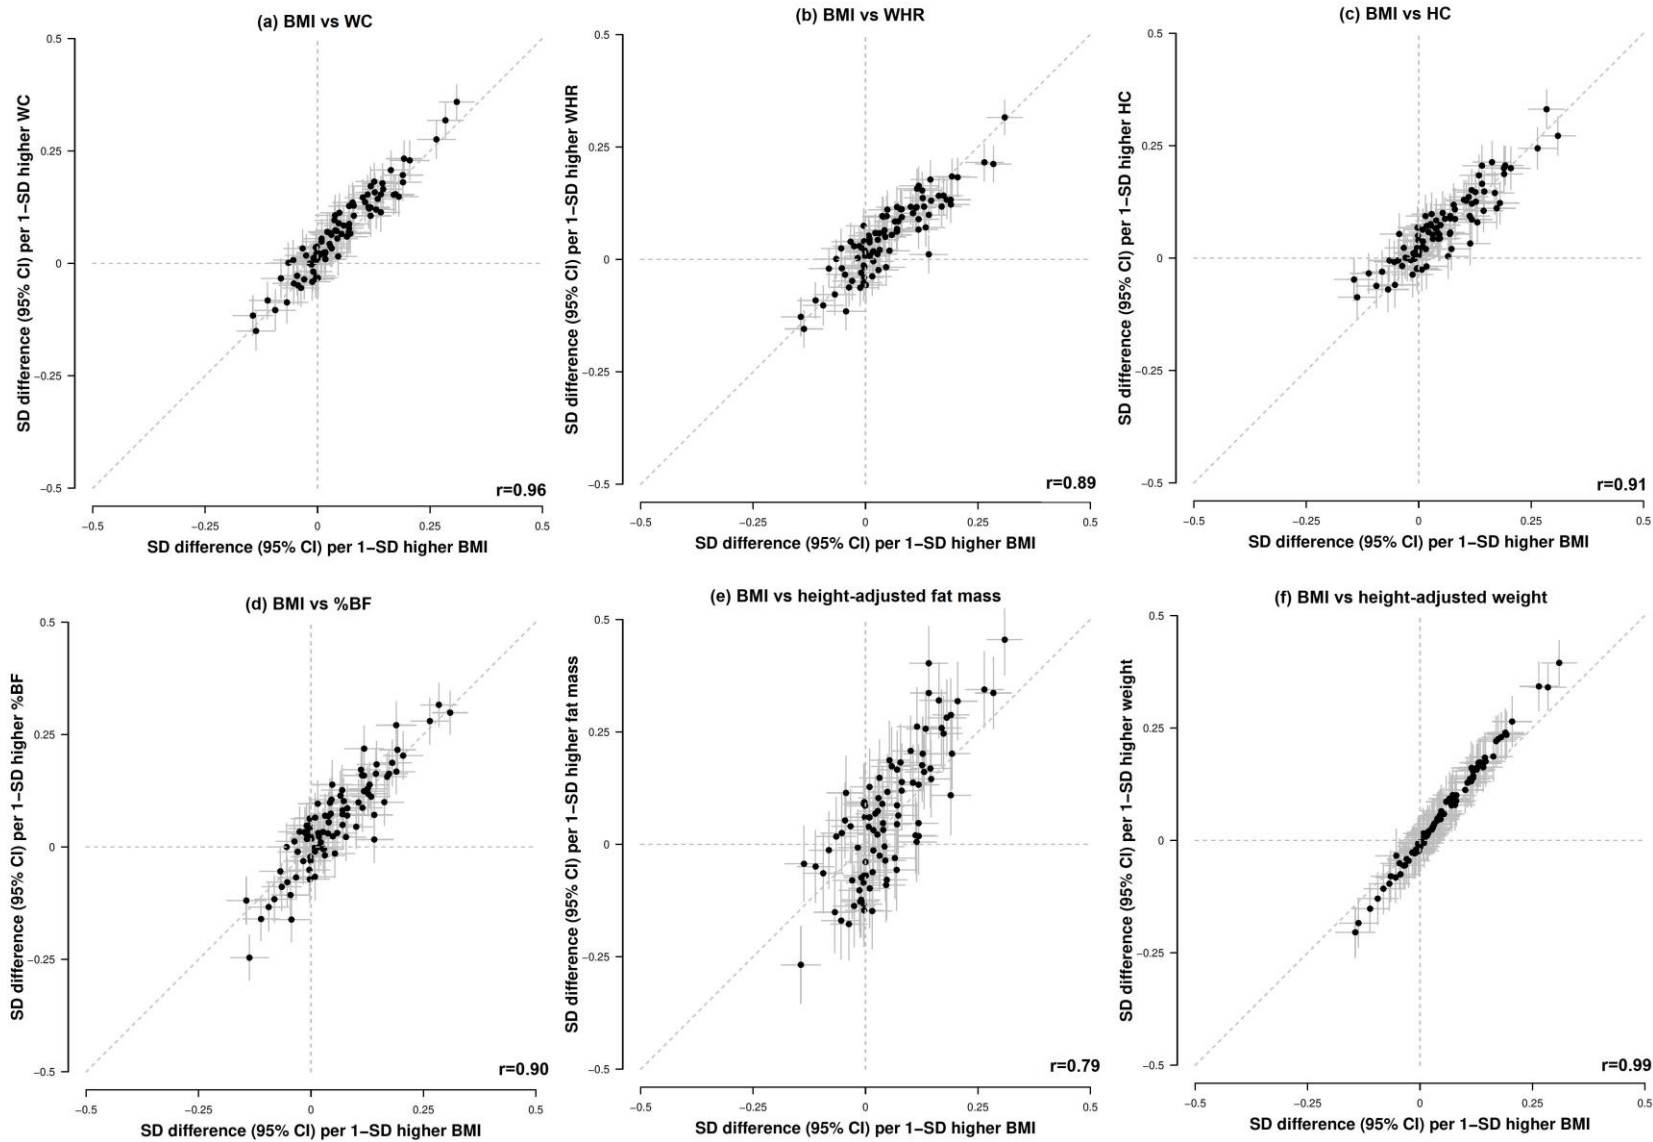



**eFigure 7. Global comparison of 1-SD differences of 90 protein biomarkers associated with 1-SD higher observational BMI versus genetically elevated BMI**

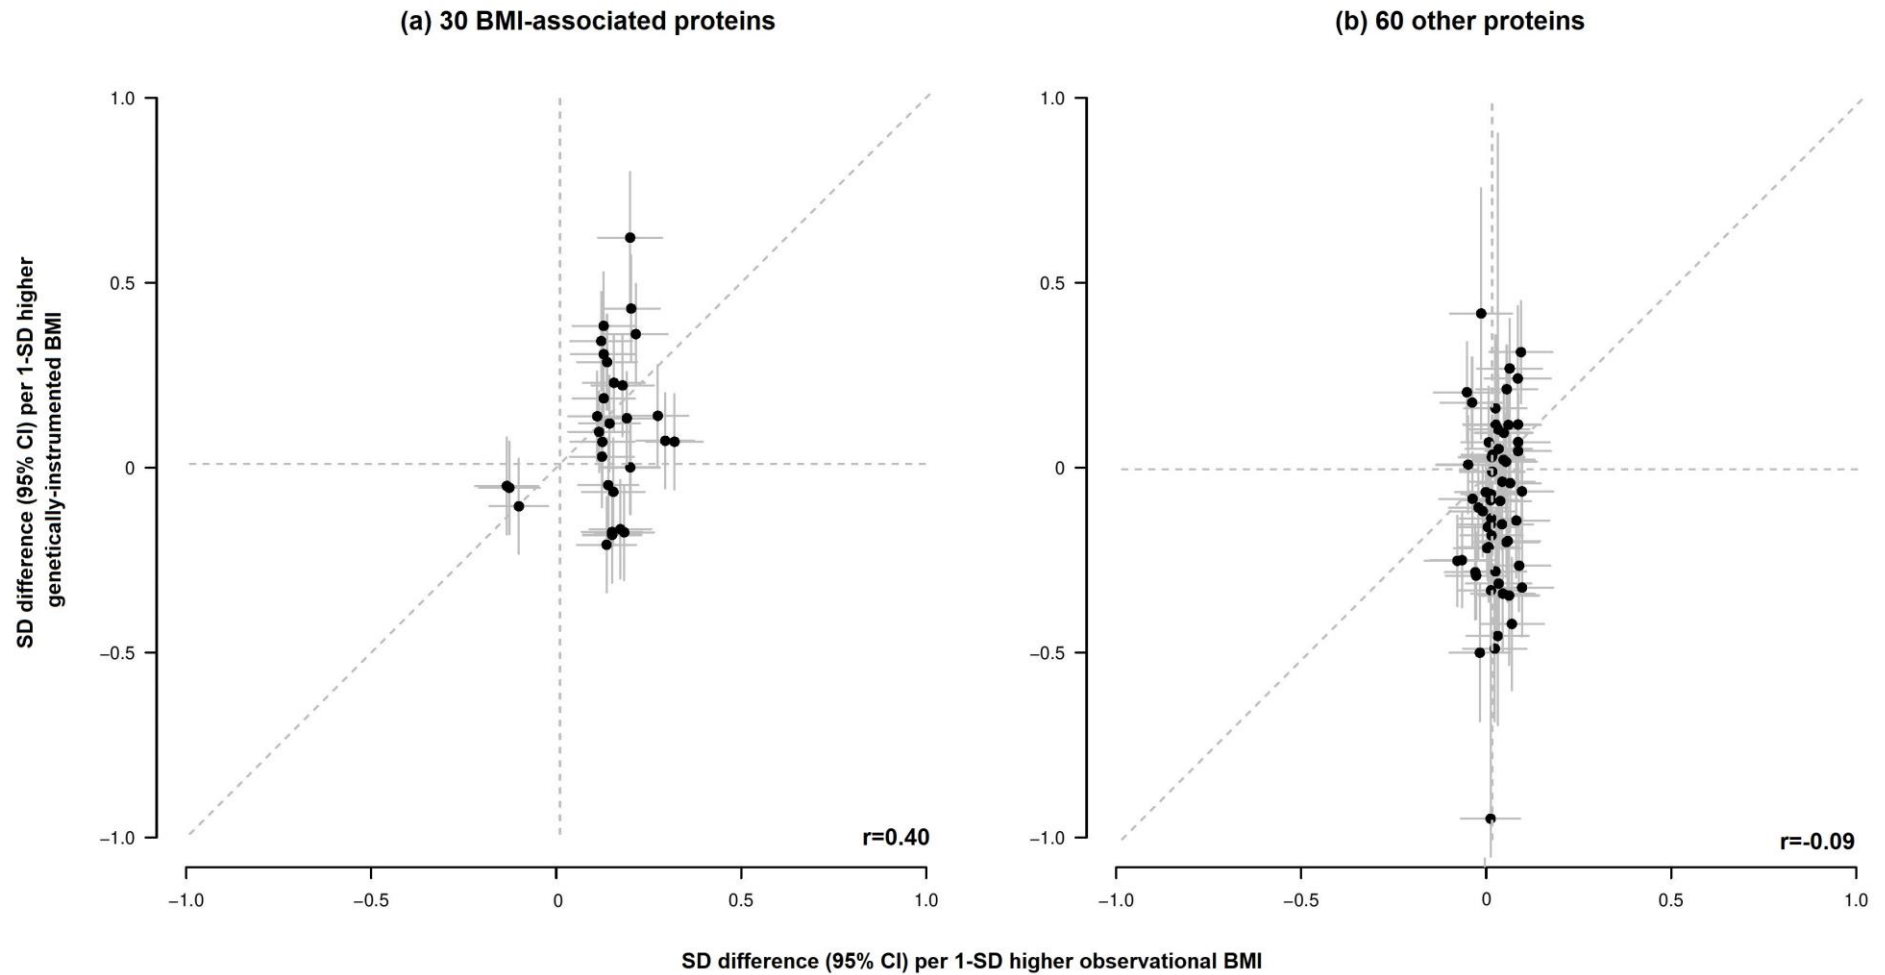

Panel (a) shows the 30 protein biomarkers which showed observational associations with BMI at FDR <5%, panel (b) shows the 60 other proteins.

**eFigure 8. Meta-analysis of causal associations of BMI with selected protein biomarkers**

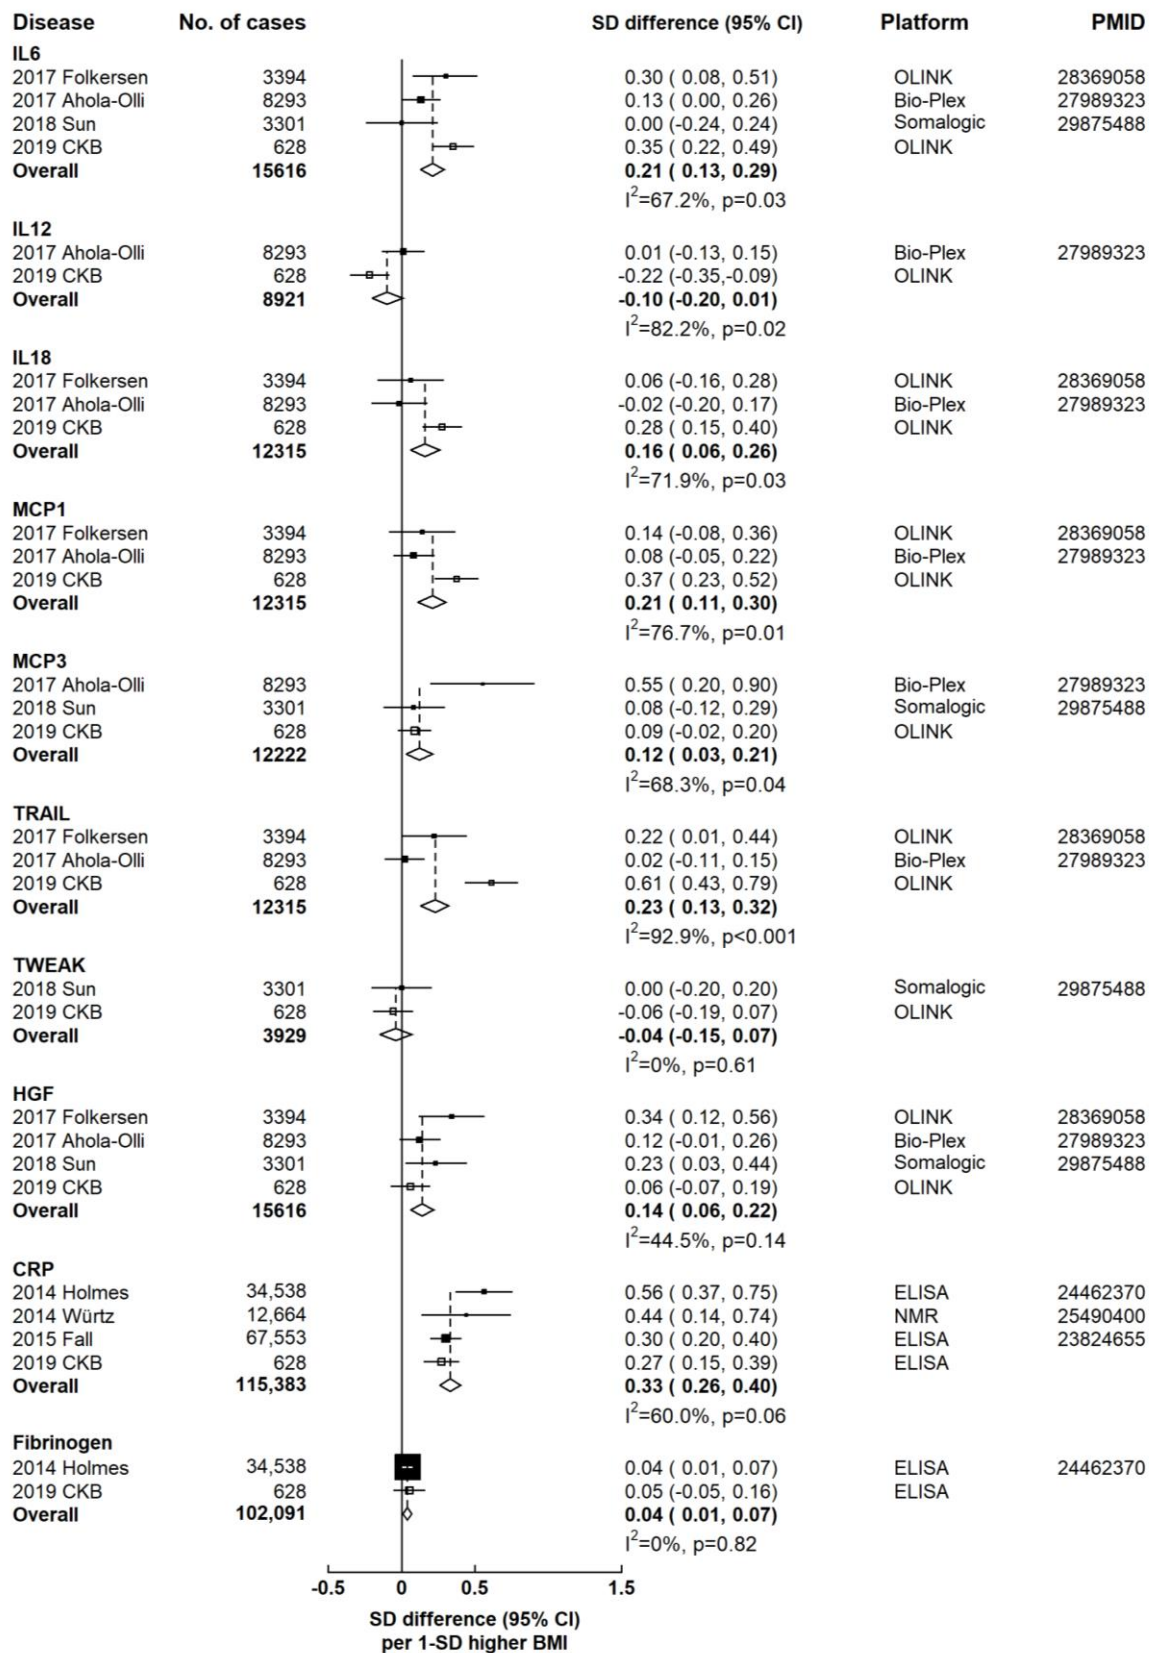

**eFigure 9. Meta-analysis of genetic associations of BMI with proteins and of proteins with CVD**

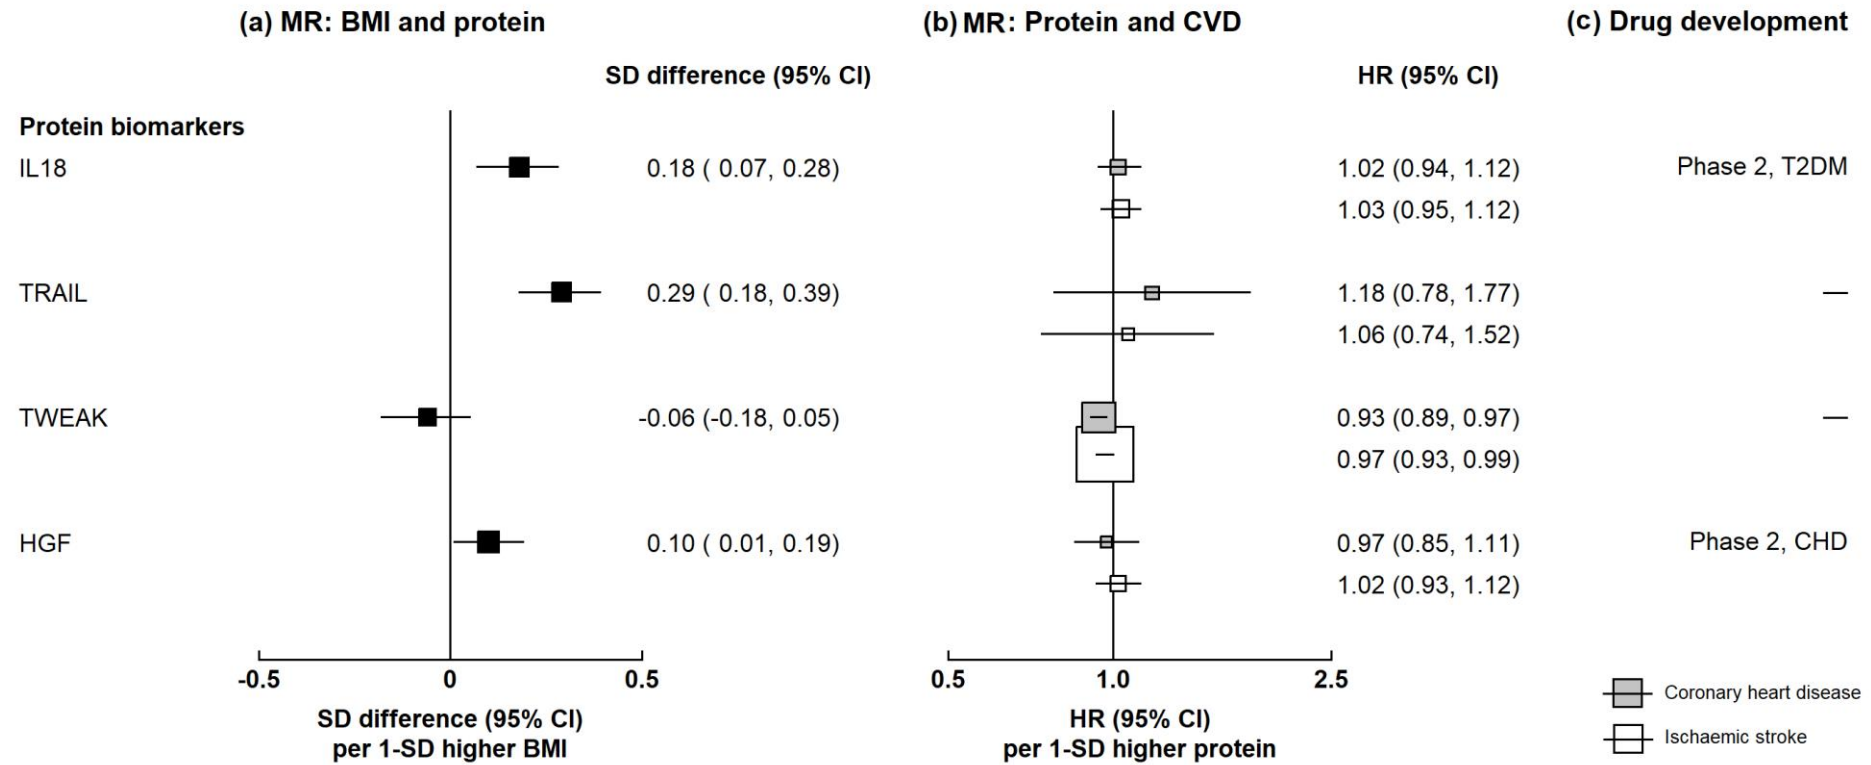

Column (a) shows genetic associations of BMI with selected proteins. Column (b) shows genetic associations of selected proteins with CVD (**eMethods**). Column (c) shows the stage of drug development for selected proteins. Abbreviations: CHD, coronary heart disease; T2DM, type 2 diabetes mellitus.

**eFigure 10. Associations of *cis* and *trans* SNP in relation to protein biomarkers and CVD**

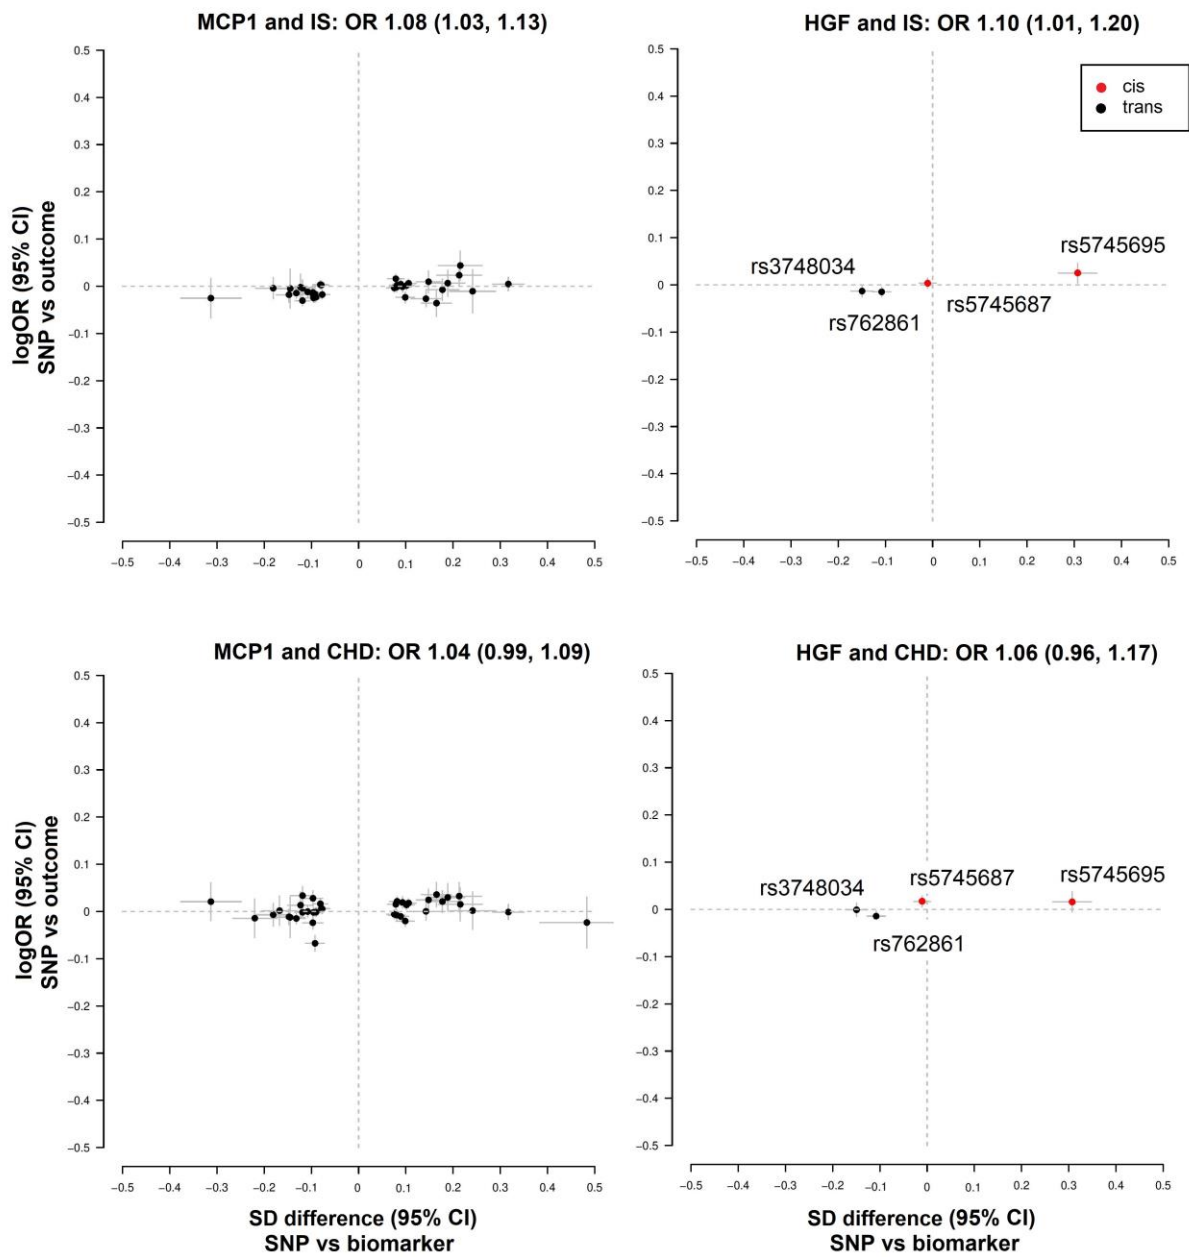

Abbreviations: IS, ischaemic stroke; CHD, coronary heart disease; OR, odds ratio.

eFigure 10. continued

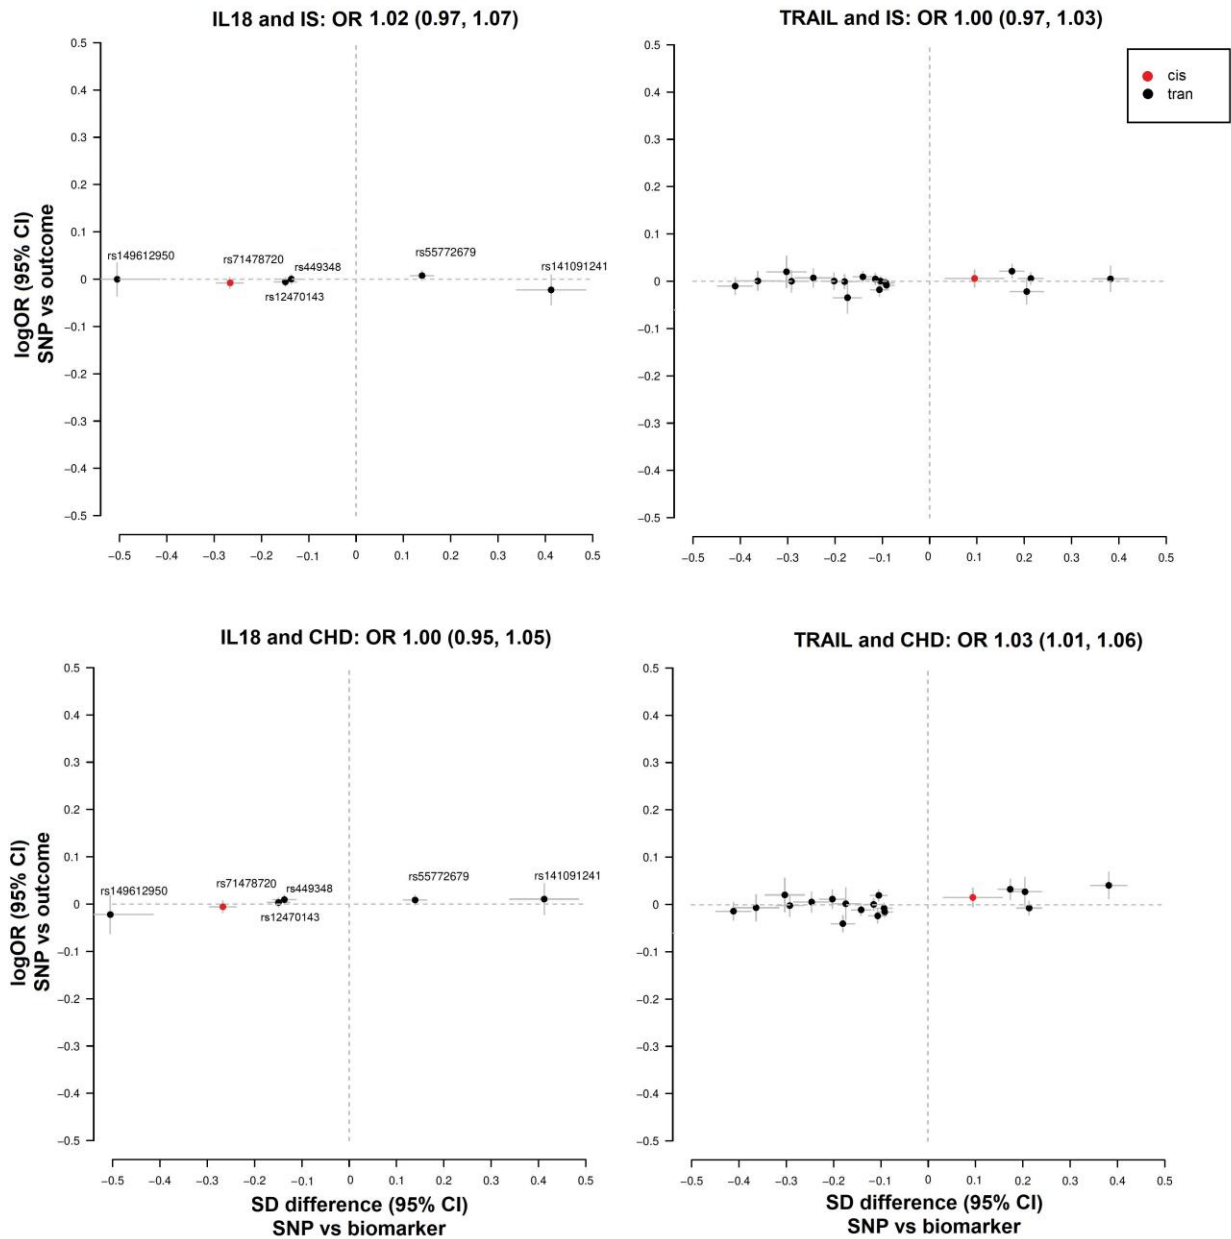

Abbreviations: IS, ischaemic stroke; CHD, coronary heart disease; OR, odds ratio.

## eFigure 11. Colocalisation analysis of TWEAK, HGF, and ischaemic stroke

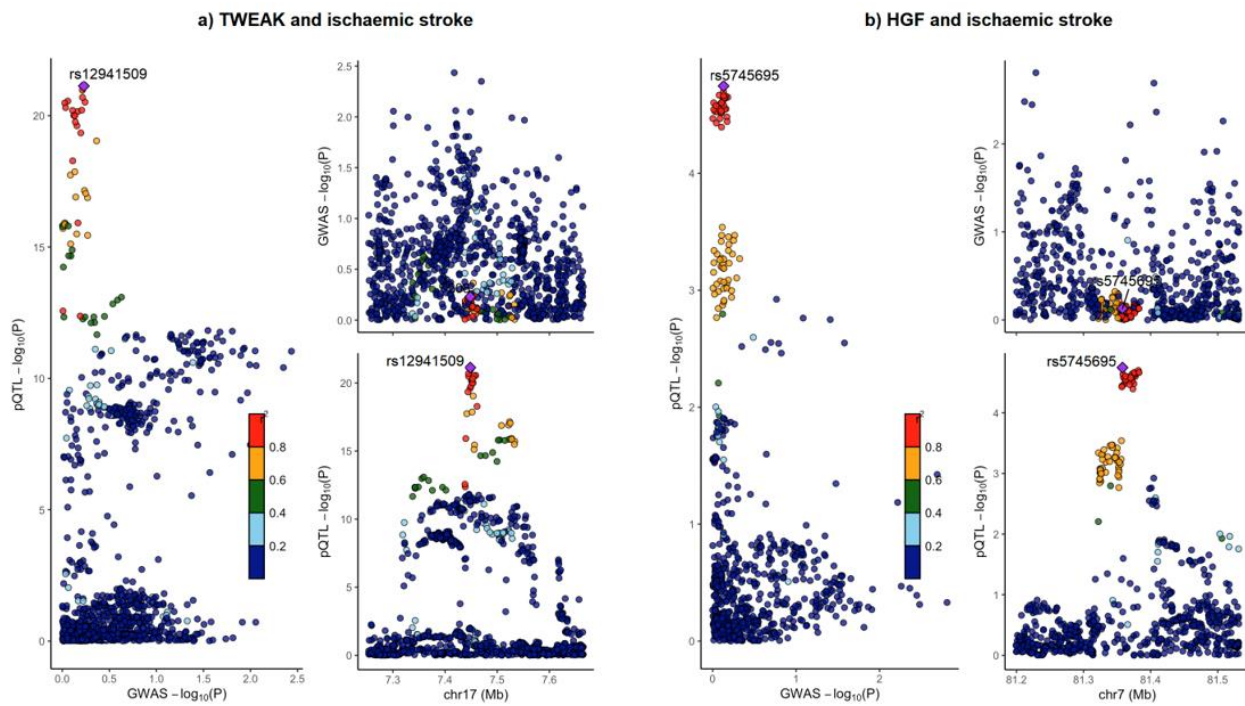

|                                              | <b>TWEAK</b>           | <b>HGF</b>             |
|----------------------------------------------|------------------------|------------------------|
| <b>Lead SNP</b>                              | rs12941509             | rs5745695              |
| <b>No. of SNPs</b>                           | 1125                   | 792                    |
| <b>Size of the window</b>                    | chr17: 7452416-7464918 | chr7:81331444-81399452 |
| <b>PP for H0-H4</b>                          |                        |                        |
| H0: No causal variant for either trait       | 1.12x10 <sup>-42</sup> | 6.30x10 <sup>-7</sup>  |
| H1: Causal variant for protein trait only    | 0.973                  | 0.968                  |
| H2: Causal variant for ischaemic stroke only | 2.40x10 <sup>-44</sup> | 1.77x10 <sup>-8</sup>  |
| H3: Two distinct causal variants             | 0.021                  | 0.027                  |
| H4: One common causal variant                | 0.0059                 | 0.0053                 |

Abbreviation: H, hypothesis; PP, posterior probabilities.

**eFigure 12. Genetic associations of BMI with proteomics comparing weighted and unweighted GRS**

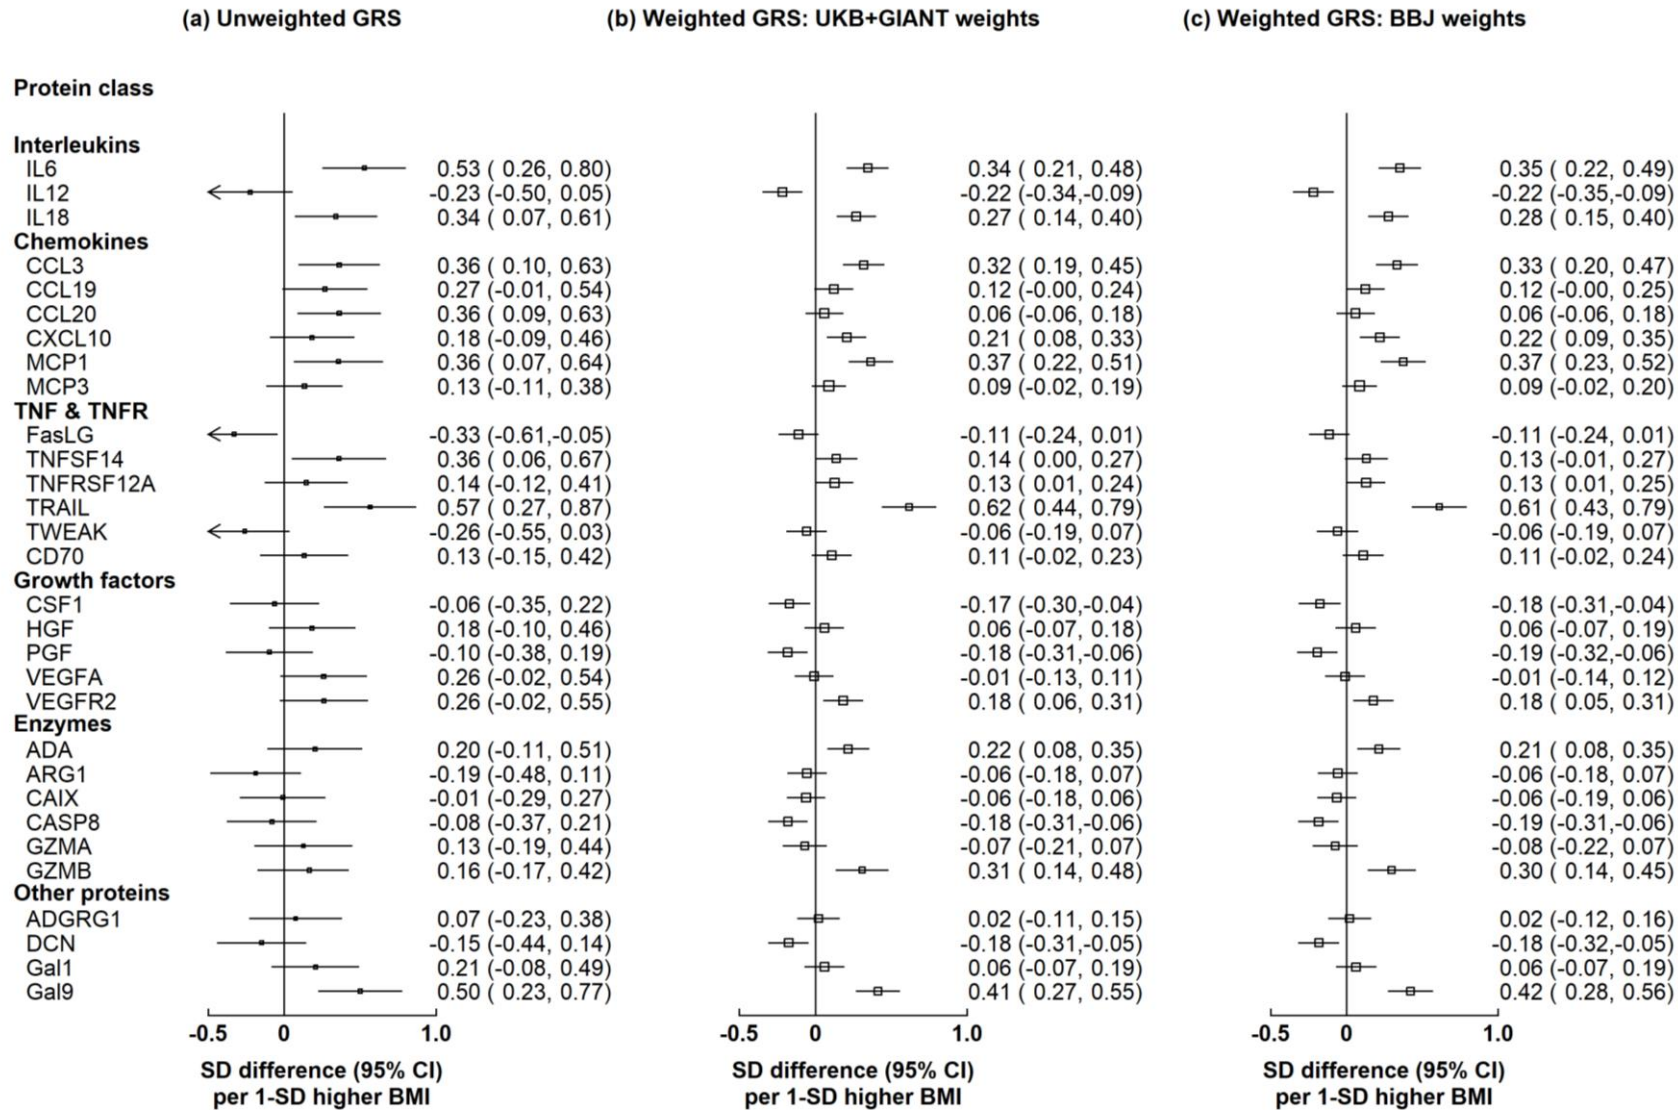

eFigure 13. Genetic associations of BMI with proteomics using different external weights

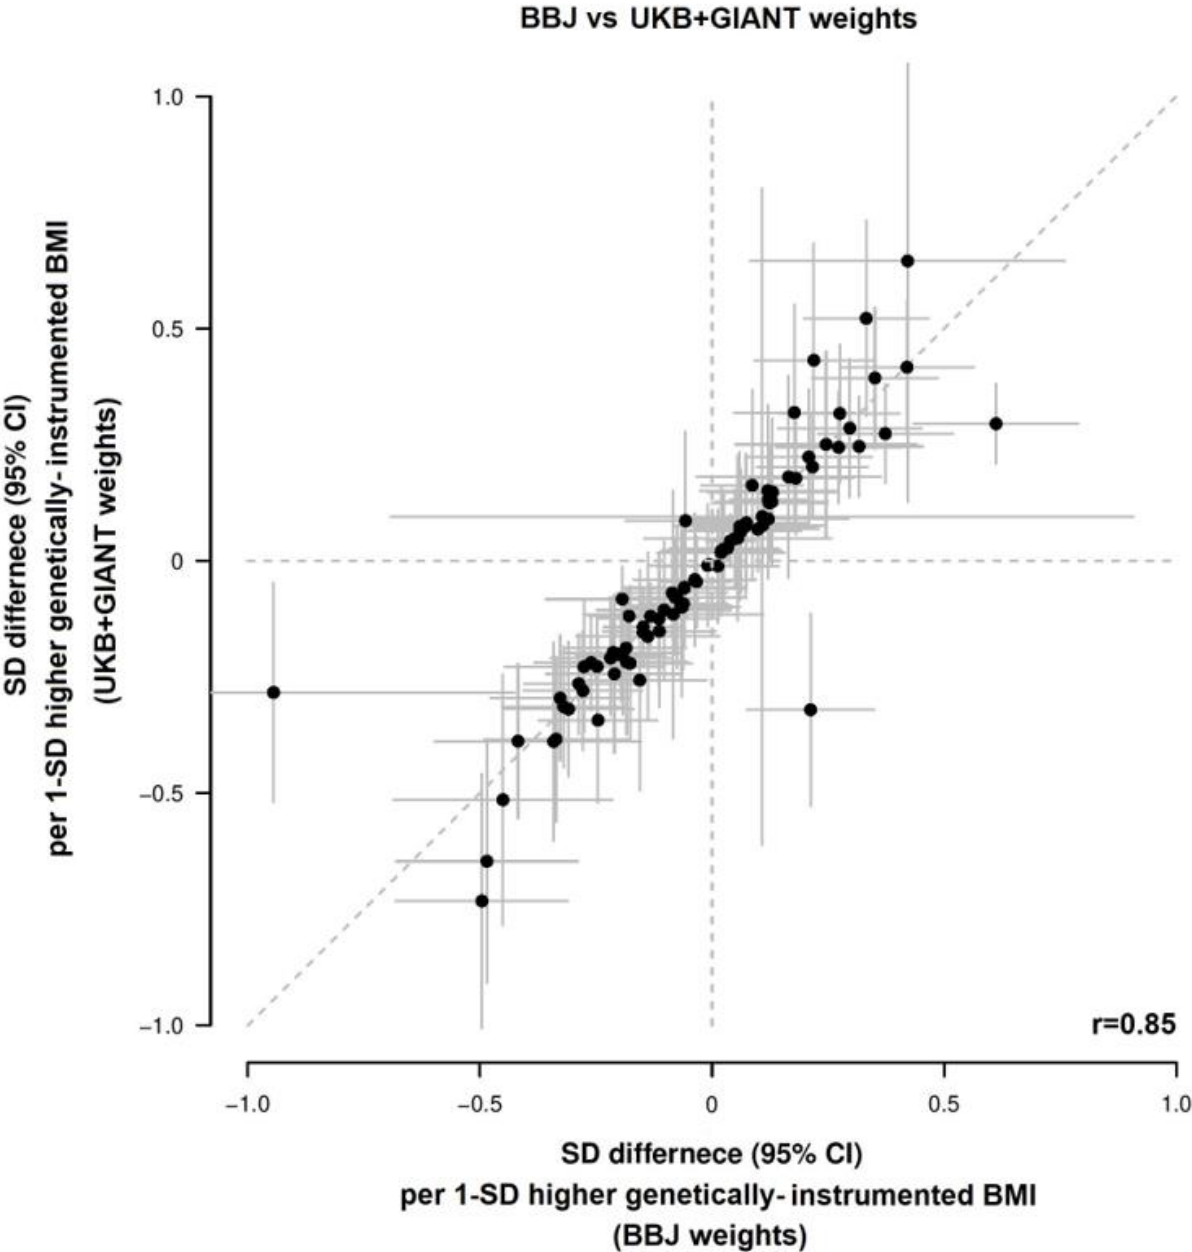



**eFigure 14. Associations of BMI with proteomics by population subgroup**

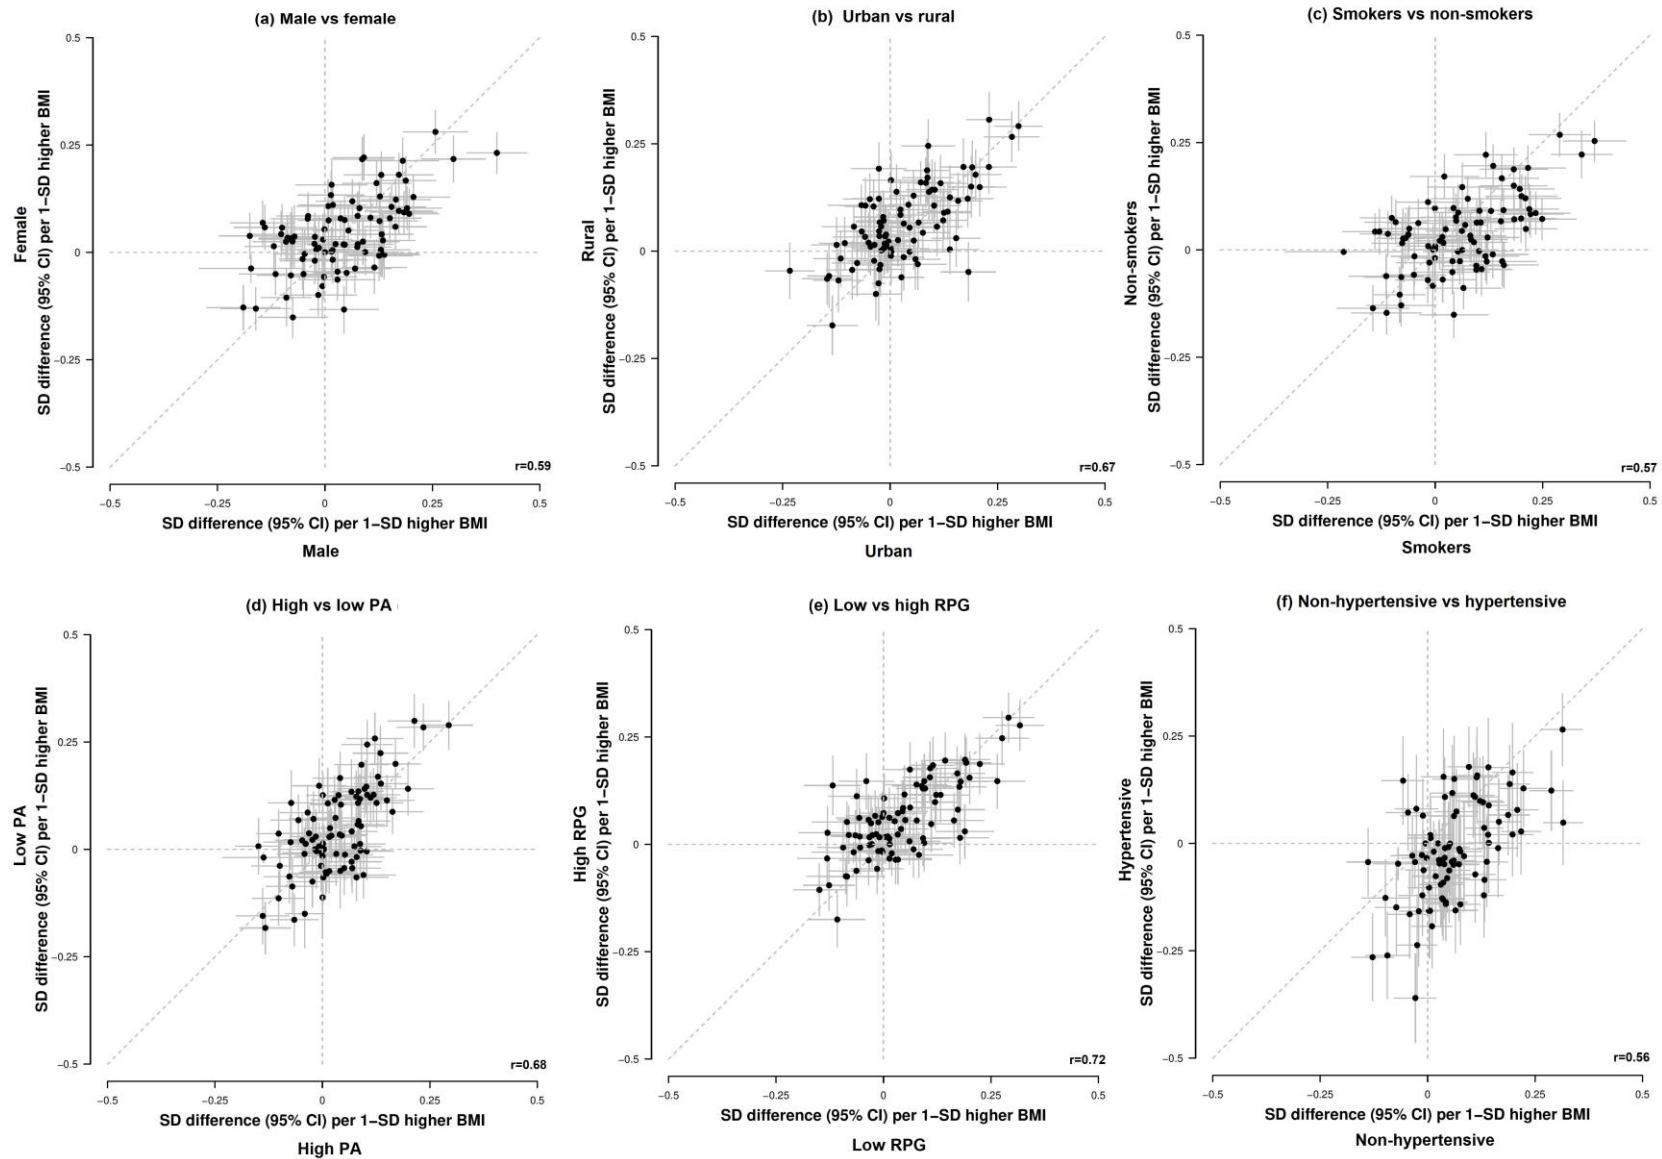

The basic model was adjusted for age at baseline, age squared, sex, area, education, household income, alcohol, self-rated health, systolic blood pressure (SBP), diabetes, statin treatment, prior kidney disease, and fasting time, where appropriate.

**eFigure 15. Observational associations of protein biomarkers with CVD**

**(a) Vascular events (n=150) vs MACE (n=90)**  
logHR per 1-SD higher protein biomarker

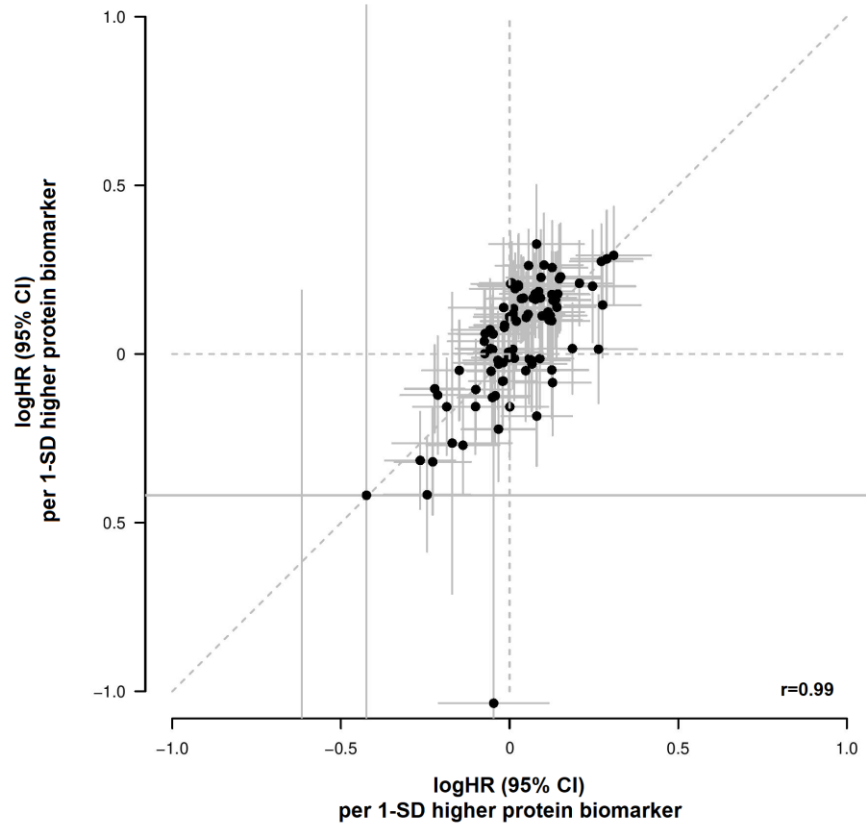

**(b) Vascular events (n=150) vs MACE (n=90)**  
HR per 1-SD higher protein biomarker

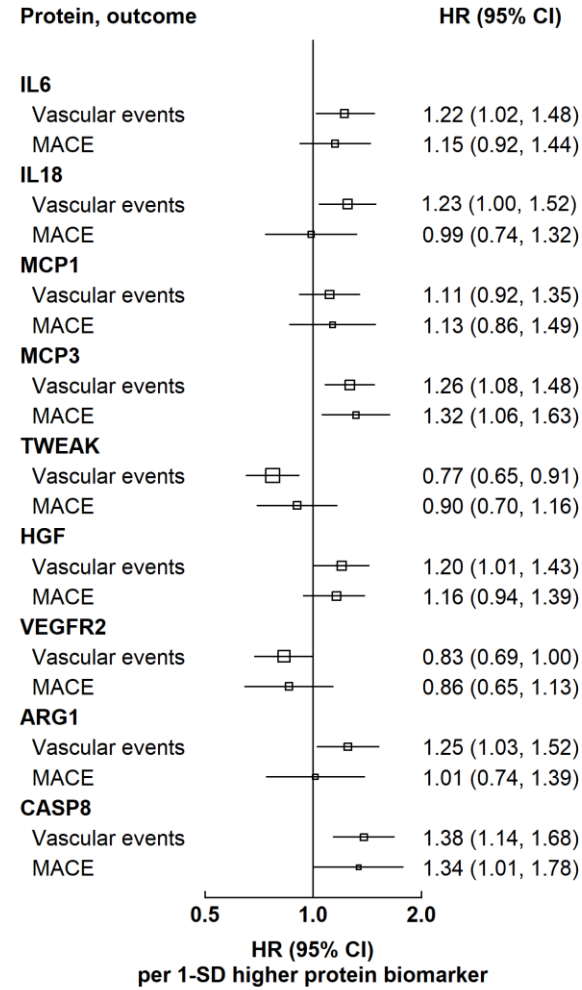

Abbreviation: MACE, major adverse coronary events.

**eFigure 16. Causal associations of BMI and proteomics using different MR methods**

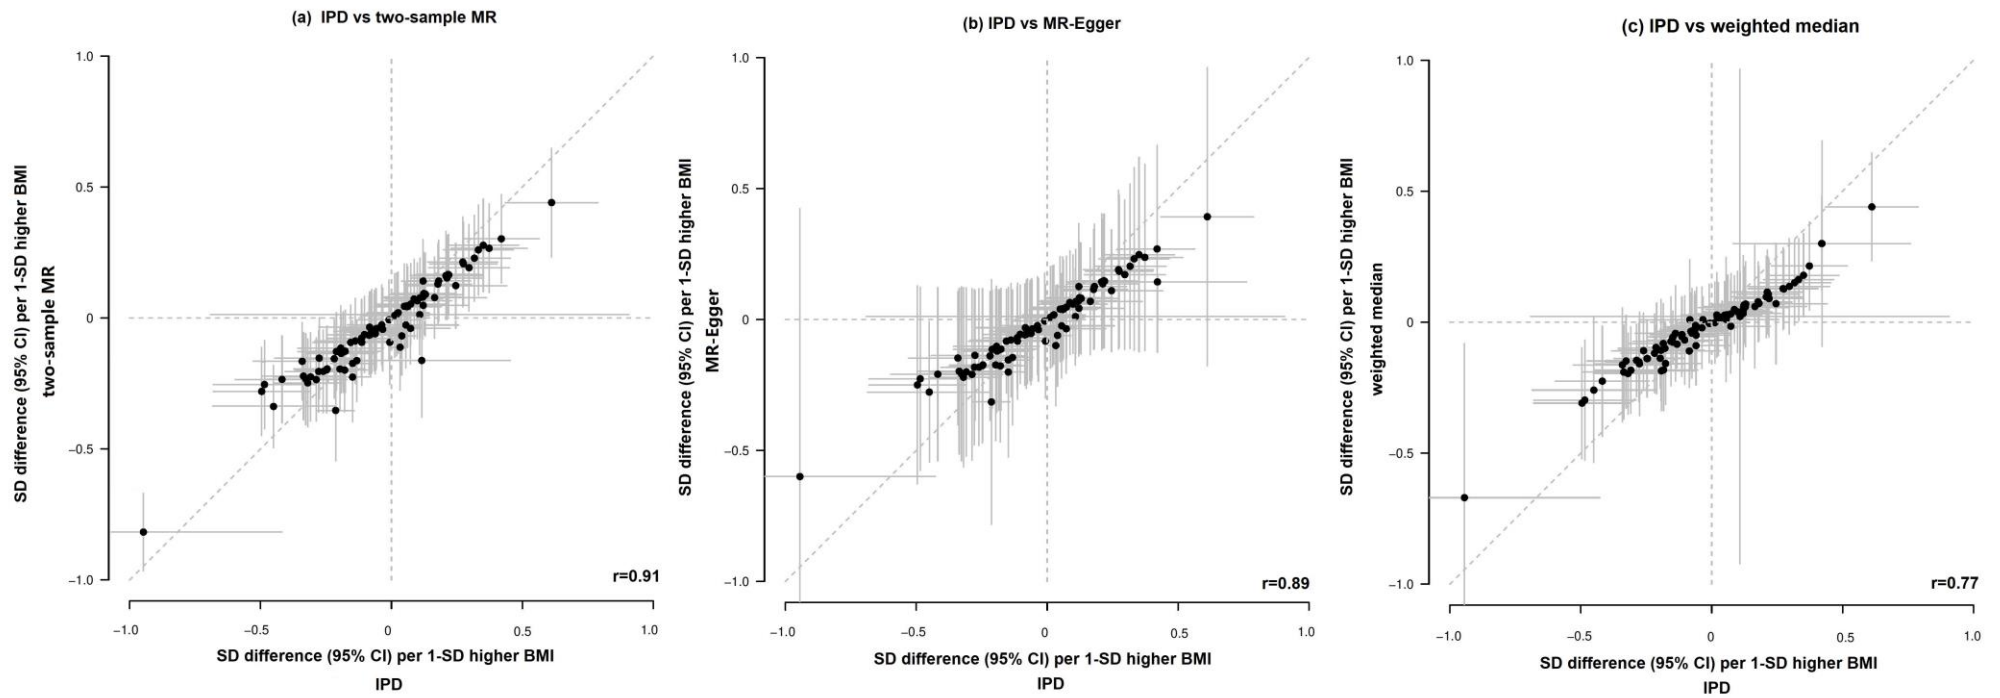

Abbreviation: IPD, individual participant-level data.

**eFigure 17. Sensitivity analyses of genetic associations of BMI and proteomics in CKB**

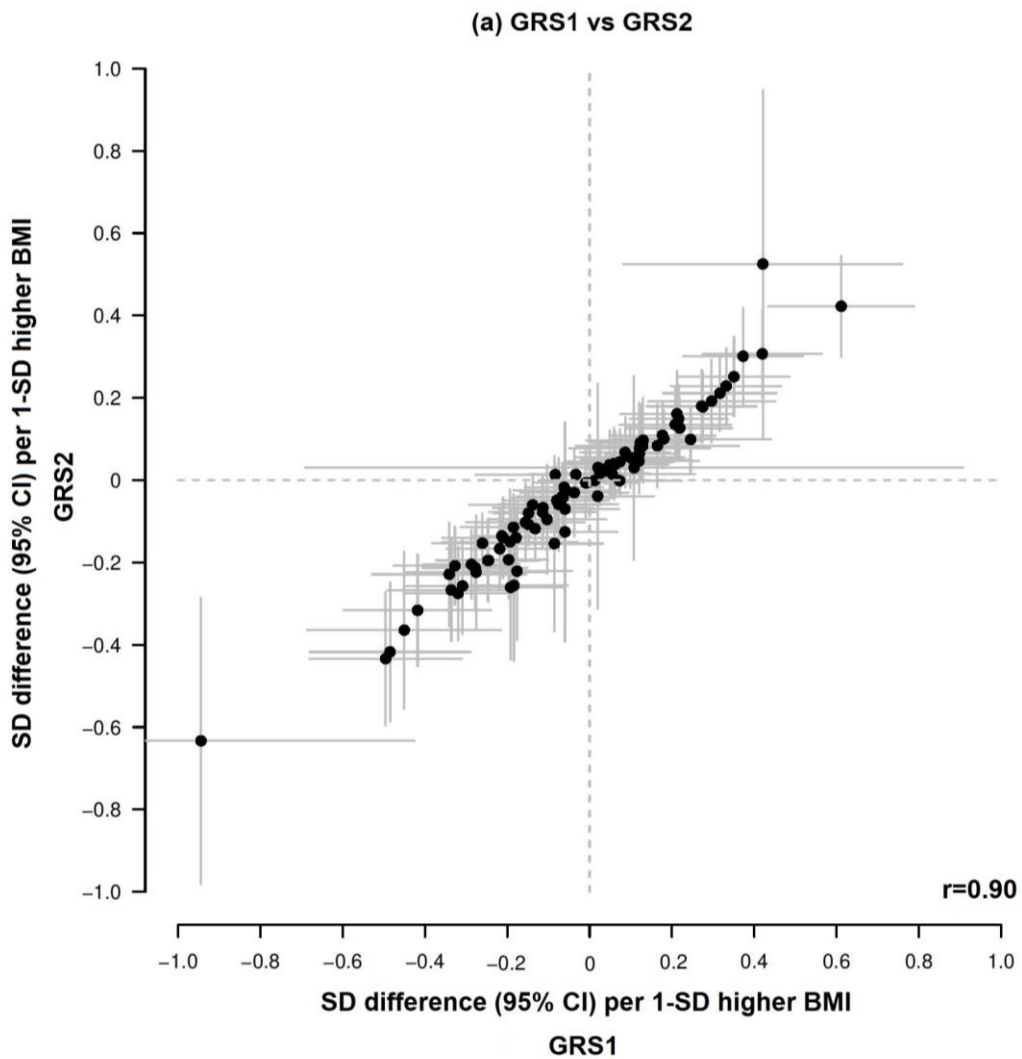

GRS1 refers to the genetic score comprising 571 SNPs. GRS2 refers to the genetic score excluding 51 SNPs within 1M bp of genes encoding protein biomarkers.

eFigure 18. Central illustration of BMI, protein biomarkers, and risk of CVD

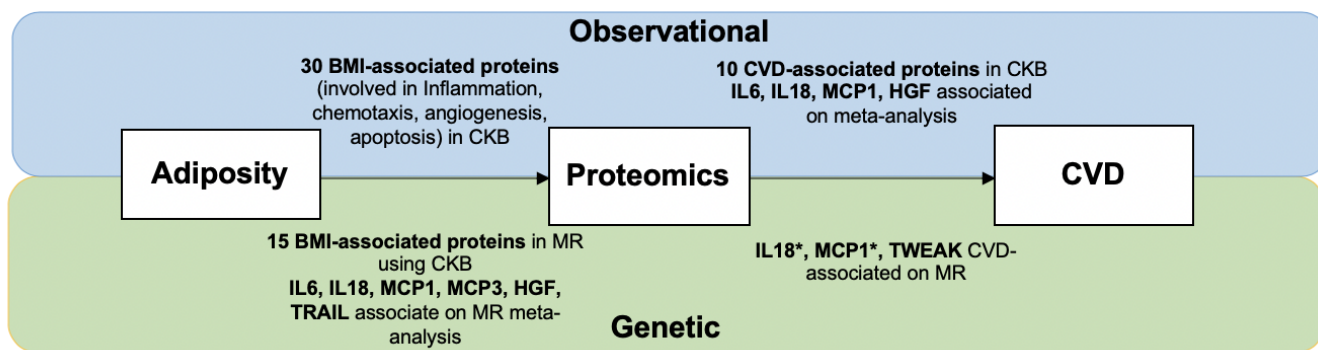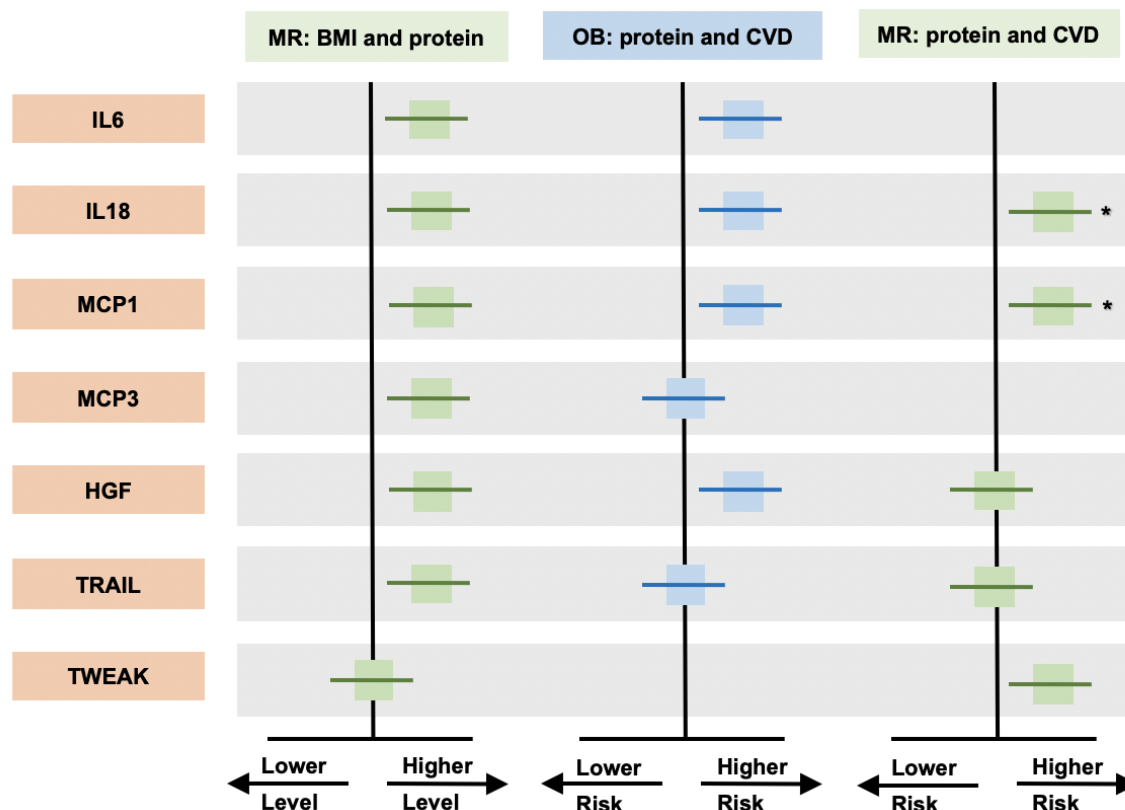

We assessed the associations of BMI with 90 protein biomarkers and of these protein biomarkers with risk of CVD. For the associations between BMI and protein biomarkers, the study showed that measured BMI was observationally associated with 30 protein biomarkers involved in inflammation, chemotaxis, angiogenesis, and apoptosis, with general concordance between the observational and genetic associations. When meta-analysed with MR estimates calculated from previous GWAS studies, the genetic associations were most robust for IL6, IL18, MCP1, MCP3, HGF, and TRAIL. For the associations between protein biomarkers and CVD, ten showed nominal observational associations with risk of CVD among the 30 BMI-associated proteins. When meta-analysed with previous prospective studies, observational associations were identified for IL6, IL18, MCP1, and HGF. Using available instruments in European populations, there was some evidence of genetic associations for MCP1 and TWEAK with CVD. The lower panel illustrates the associations of BMI with selected proteins demonstrating evidence of a potentially causal effect (other than for TWEAK), the observational association of these proteins with risk of CVD, and where possible, the MR estimate with CVD. Note that for IL18 while no association with CVD was seen we identified a potential association with type 2 diabetes. For MCP1, the MR was driven entirely by *trans*-pQTL.

**eTable 1. List of 92 proteomics quantified by the OLINK immuno-oncology assay**

| Label  | Name                                        | Biological process |   |   |   |
|--------|---------------------------------------------|--------------------|---|---|---|
| ADA    | Adenosine deaminase                         | M                  |   |   | V |
| ADGRG1 | Adhesion G-protein coupled receptor G1      |                    |   |   |   |
| ANG1   | Angiopoietin-1                              |                    |   |   | V |
| ANGPT2 | Angiopoietin-2                              |                    |   |   | V |
| ARG1   | Arginase-1                                  |                    |   |   |   |
| CAIX   | Carbonic anhydrase IX                       | M                  |   |   | V |
| CASP8  | Caspase-8                                   | A                  |   |   |   |
| CCL3   | C-C motif chemokine 3                       | C                  |   |   |   |
| CCL4   | C-C motif chemokine 4                       | C                  |   |   |   |
| CCL17  | C-C motif chemokine 17                      | C                  |   | S |   |
| CCL19  | C-C motif chemokine 19                      | C                  |   | S |   |
| CCL20  | C-C motif chemokine 20                      | C                  |   | S |   |
| CCL23  | C-C motif chemokine 23                      | C                  |   |   | V |
| CD4    | T-cell surface glycoprotein CD4             |                    | P | S |   |
| CD5    | T-cell surface glycoprotein CD5             |                    | P | S |   |
| CD8A   | T-cell surface glycoprotein CD8 alpha chain |                    | P |   |   |
| CD27   | CD27 antigen                                |                    | P |   |   |
| CD28   | T-cell surface glycoprotein CD28            |                    | P |   |   |
| CD40   | CD40L receptor                              |                    | P |   |   |
| CD40L  | CD40-L                                      | A                  | P |   |   |
| CD70   | CD70 antigen                                |                    | P |   |   |
| CD83   | CD83 antigen                                |                    | P |   |   |
| CD244  | Natural killer cell receptor 2B4            |                    | P |   |   |
| CRTAM  | Cytotoxic and regulatory T-cell molecule    |                    | P |   |   |
| CSF1   | Macrophage colony-stimulating factor 1      |                    |   | S |   |
| CX3CL1 | Fractalkine                                 | C                  | P |   |   |
| CXCL1  | C-X-C motif chemokine 1                     | C                  |   | S | V |
| CXCL5  | C-X-C motif chemokine 5                     | C                  |   | S | V |
| CXCL9  | C-X-C motif chemokine 9                     | C                  | P |   | V |
| CXCL10 | C-X-C motif chemokine 10                    | C                  | P |   | V |
| CXCL11 | C-X-C motif chemokine 11                    | C                  | P | S | V |
| CXCL12 | Stromal cell-derived factor 1               | C                  |   | S | V |
| CXCL13 | C-X-C motif chemokine 13                    | C                  | P | S |   |
| DCN    | Decorin                                     |                    |   |   | V |
| EGF    | Pro-epidermal growth factor                 |                    |   |   | V |
| FasL   | Fas antigen ligand                          | A                  |   |   |   |
| FGF2   | Fibroblast growth factor 2                  |                    |   |   | V |
| Gal1   | Galectin-1                                  |                    |   | S | V |
| Gal9   | Galectin-9                                  | A                  |   | S | V |
| GZMA   | Granzyme A                                  | A                  |   |   |   |
| GZMB   | Granzyme B                                  | A                  |   |   |   |
| GZMH   | Granzyme H                                  | A                  |   |   |   |
| HGF    | Hepatocyte growth factor                    |                    |   |   | V |
| HO1    | Heme oxygenase 1                            | M                  |   |   |   |
| ICOSLG | ICOS ligand                                 |                    | P |   |   |

| Label          | Name                                                         | Biological process |   |   |
|----------------|--------------------------------------------------------------|--------------------|---|---|
| IFN beta       | Interferon beta                                              | P                  |   |   |
| IFN gamma      | Interferon gamma                                             | P                  |   |   |
| IL1 alpha      | Interleukin-1 alpha                                          | P                  | S | V |
| IL2            | Interleukin-2                                                | P                  |   |   |
| IL4            | Interleukin-4                                                |                    | S |   |
| IL5            | Interleukin-5                                                |                    | S |   |
| IL6            | Interleukin-6                                                | P                  | S |   |
| IL7            | Interleukin-7                                                | P                  |   |   |
| IL8            | Interleukin-8                                                | C                  | S | V |
| IL10           | Interleukin-10                                               |                    | S |   |
| IL12           | Interleukin-12                                               |                    |   |   |
| IL12RB1        | Interleukin-12 receptor subunit beta-1                       | P                  |   |   |
| IL13           | Interleukin-13                                               |                    | S |   |
| IL18           | Interleukin-18                                               | P                  | S |   |
| IL21           | Interleukin-21                                               | P                  |   |   |
| IL33           | Interleukin-33                                               |                    | S |   |
| IL35           | Interleukin-35                                               |                    | S |   |
| KLRD1          | Natural killer cells antigen CD94                            | P                  |   |   |
| LAMP3          | Lysosome-associated membrane glycoprotein 3                  |                    | S |   |
| LAP TGF-beta-1 | Latency-associated peptide transforming growth factor beta-1 |                    | S |   |
| MCP1           | Monocyte chemotactic protein 1                               | C                  |   | V |
| MCP2           | Monocyte chemotactic protein 2                               | C                  |   |   |
| MCP3           | Monocyte chemotactic protein 3                               | C                  |   |   |
| MCP4           | Monocyte chemotactic protein 4                               | C                  | S | V |
| MIC-A/B        | MHC class I polypeptide-related sequence A/B                 |                    | S |   |
| MMP7           | Matrix metalloproteinase-7                                   | A                  | S |   |
| MMP12          | Matrix metalloproteinase-12                                  |                    | S | V |
| NCR1           | Natural cytotoxicity triggering receptor 1                   | P                  |   |   |
| NOS3           | Nitric oxide synthase, endothelial                           |                    |   | V |
| PD L1          | Programmed cell death 1 ligand 1                             |                    | S |   |
| PD L2          | Programmed cell death 1 ligand 2                             |                    | S |   |
| PDCD1          | Programmed cell death protein 1                              |                    | S |   |
| PDGF subunit B | Platelet-derived growth factor subunit B                     |                    |   | V |
| PGF            | Placenta growth factor                                       |                    |   | V |
| PTN            | Pleiotrophin                                                 |                    |   | V |
| TIE2           | Angiopoietin-1 receptor                                      |                    |   | V |
| TNF            | Tumour necrosis factor alpha                                 | P                  | S | V |
| TNFRSF4        | Tumour necrosis factor receptor superfamily member 4         | P                  |   |   |
| TNFRSF9        | Tumour necrosis factor receptor superfamily member 9         | P                  |   |   |
| TNFRSF12A      | Tumour necrosis factor receptor superfamily member 12A       | A                  |   | V |
| TNFRSF21       | Tumour necrosis factor receptor superfamily member 21        | A                  |   |   |
| TNFSF14        | Tumour necrosis factor ligand superfamily member 14          | P                  |   |   |
| TRAIL          | TNF-related apoptosis-inducing ligand                        | A                  |   |   |
| TWEAK          | Tumour necrosis factor (Ligand) superfamily, member 12       | A                  |   | V |
| VEGFA          | Vascular endothelial growth factor A                         |                    |   | V |

| <b>Label</b> | <b>Name</b>                                   | <b>Biological process</b> |
|--------------|-----------------------------------------------|---------------------------|
| VEGFC        | Vascular endothelial growth factor C          | V                         |
| VEGFR2       | Vascular endothelial growth factor receptor 2 | V                         |

Abbreviations: A, apoptosis/cell killing; C, chemotaxis; M, metabolism/autophagy; P, promote tumour immunity; S, suppress tumour immunity; V, vascular & tissue remodelling.



**eTable 2. Grouping of the 92 proteins measured by OLINK Immuno-Oncology assay**

| Label, group                  | Name                           | Protein type                        |
|-------------------------------|--------------------------------|-------------------------------------|
| <b>Chemokines</b>             |                                |                                     |
| CCL3                          | C-C motif chemokine 3          | Chemokine CC family                 |
| CCL4                          | C-C motif chemokine 4          | Chemokine CC family                 |
| CCL17                         | C-C motif chemokine 17         | Chemokine CC family                 |
| CCL19                         | C-C motif chemokine 19         | Chemokine CC family                 |
| CCL20                         | C-C motif chemokine 20         | Chemokine CC family                 |
| CCL23                         | C-C motif chemokine 23         | Chemokine CC family                 |
| MCP1/CCL2                     | Monocyte chemotactic protein 1 | Chemokine CC family                 |
| MCP2/CCL8                     | Monocyte chemotactic protein 2 | Chemokine CC family                 |
| MCP3/CCL7                     | Monocyte chemotactic protein 3 | Chemokine CC family                 |
| MCP4                          | Monocyte chemotactic protein 4 | Chemokine CC family                 |
| CXCL1                         | C-X-C motif chemokine 1        | Chemokine CxC family, growth factor |
| CXCL5                         | C-X-C motif chemokine 5        | Chemokine CxC family                |
| CXCL9                         | C-X-C motif chemokine 9        | Chemokine CxC family                |
| CXCL10                        | C-X-C motif chemokine 10       | Chemokine CxC family                |
| CXCL11                        | C-X-C motif chemokine 11       | Chemokine CxC family                |
| CXCL12                        | Stromal cell-derived factor 1  | Chemokine CxC family, growth factor |
| CXCL13                        | C-X-C motif chemokine 13       | Chemokine CxC family                |
| CX3CL1                        | Fractalkine                    | Interocrine delta family            |
|                               |                                |                                     |
| <b>Inflammatory cytokines</b> |                                |                                     |
| <b>Interleukins</b>           |                                |                                     |
| IL1 alpha                     | Interleukin-1 alpha            | IL1 family, mitogen                 |
| IL2                           | Interleukin-2                  | IL2 family, growth factor           |
| IL4                           | Interleukin-4                  | IL4/IL13 family, growth factor      |
| IL5                           | Interleukin-5                  | IL5 family, growth factor           |
| IL6                           | Interleukin-6                  | IL6 superfamily, growth factor      |

| Label, group                     | Name                                                  | Protein type                                       |
|----------------------------------|-------------------------------------------------------|----------------------------------------------------|
| IL7                              | Interleukin-7                                         | IL7/IL9 family, growth factor                      |
| IL8                              | Interleukin-8                                         | Chemokine CxC family                               |
| IL10                             | Interleukin-10                                        | IL10 family                                        |
| IL12                             | Interleukin-12                                        | IL6 superfamily, growth factor                     |
| IL12RB1                          | Interleukin-12 receptor subunit beta-1                | Type I cytokine receptor family, cytokine receptor |
| IL13                             | Interleukin-13                                        | IL4/IL13 family                                    |
| IL18                             | Interleukin-18                                        | IL1 family                                         |
| IL21                             | Interleukin-21                                        | IL15/IL21 family, growth factor                    |
| IL33                             | Interleukin-33                                        | IL1 family                                         |
| IL35                             | Interleukin-35                                        | IL12 family                                        |
| <b><i>Interferon</i></b>         |                                                       |                                                    |
| IFN-beta                         | Interferon beta                                       | Alpha/beta interferon family                       |
| IFN-gamma                        | Interferon gamma                                      | Gamma interferon family                            |
| <b><i>TNF(R) superfamily</i></b> |                                                       |                                                    |
| TNF                              | Tumor necrosis factor                                 | TNF superfamily                                    |
| TNFSF14                          | Tumor necrosis factor ligand superfamily member 14    | TNF superfamily                                    |
| TRAIL                            | TNF-related apoptosis-inducing ligand                 | TNF superfamily                                    |
| TWEAK                            | Tumor necrosis factor (ligand) superfamily, member 12 | TNF superfamily                                    |
| TNFRSF4                          | Tumor necrosis factor receptor superfamily member 4   | TNFR superfamily                                   |
| TNFRSF9                          | Tumor necrosis factor receptor superfamily member 9   | TNFR superfamily                                   |
| TNFRSF12A                        | Tumor necrosis factor receptor superfamily member 12A | TNFR superfamily                                   |
| TNFRSF21                         | Tumor necrosis factor receptor superfamily member 21  | TNFR superfamily                                   |
| CD27                             | CD27 antigen                                          | TNFR superfamily                                   |
| CD40                             | CD40 ligand receptor                                  | TNFR superfamily                                   |
| CD40L                            | CD40 ligand                                           | TNF superfamily                                    |
| CD70                             | CD70 antigen                                          | TNF superfamily                                    |
| FasLG                            | Fas antigen ligand                                    | TNF superfamily                                    |
|                                  |                                                       |                                                    |

| <b>Growth factors (receptors)</b> |                                                              |                                                                                        |
|-----------------------------------|--------------------------------------------------------------|----------------------------------------------------------------------------------------|
| <b>Label, group</b>               | <b>Name</b>                                                  | <b>Protein type</b>                                                                    |
| ANG1                              | Angiopoietin-1                                               | Growth factor, VEGF family                                                             |
| ANGPT2                            | Angiopoietin-2                                               | Growth factor                                                                          |
| CSF1                              | Macrophage colony-stimulating factor 1                       | Growth factor, cytokine                                                                |
| EGF                               | Pro-epidermal growth factor                                  | Growth factor                                                                          |
| FGF2                              | Fibroblast growth factor 2                                   | Growth factor                                                                          |
| HGF                               | Hepatocyte growth factor                                     | Growth factor                                                                          |
| LAP TGF-beta-1                    | Latency-associated peptide transforming growth factor beta-1 | Growth factor, TGF beta superfamily                                                    |
| PDGF subunit B                    | Platelet-derived growth factor subunit B                     | Growth factor, PDGF/VEGF family                                                        |
| PGF                               | Placenta growth factor                                       | Growth factor, PDGF/VEGF family                                                        |
| PTN                               | Pleiotrophin                                                 | Growth factor, pleiotrophin                                                            |
| VEGFA                             | Vascular endothelial growth factor A                         | Growth factor, VEGF family                                                             |
| VEGFC                             | Vascular endothelial growth factor C                         | Growth factor, VEGF family                                                             |
| VEGFR2                            | Vascular endothelial growth factor receptor 2                | Growth factor, PDGF/VEGF receptor family                                               |
|                                   |                                                              |                                                                                        |
| <b>Other proteins</b>             |                                                              |                                                                                        |
| <b>Enzymes</b>                    |                                                              |                                                                                        |
| ADA                               | Adenosine deaminase                                          | Purine metabolism, breaking down adenosine into nucleic acids                          |
| ARG1                              | Arginase-1                                                   | Urea metabolism, converting L-arginine to urea and L-ornithine                         |
| CAIX                              | Carbonic anhydrase IX                                        | Reversible hydration of carbon dioxide                                                 |
| CASP8                             | Caspase-8                                                    | Cysteine protease, activating the TNFRSF6/FAS mediated and TNFRSF1A induced cell death |
| GZMA                              | Granzyme A                                                   | Protease, involved in granzyme-mediated apoptotic signaling pathway                    |
| GZMB                              | Granzyme B                                                   | Protease, involved in granzyme-mediated apoptotic signaling pathway                    |
| GZMH                              | Granzyme H                                                   | Protease, involved in granzyme-mediated apoptotic signaling pathway                    |
| HO1                               | Heme oxygenase 1                                             | Heme catabolism, cleaving the heme ring to form biliverdin                             |
| MMP7                              | Matrix metalloproteinase-7                                   | Protease, activating procollagenase                                                    |
| MMP12                             | Matrix metalloproteinase-12                                  | Protease, with elastolytic activity                                                    |

|                               |                                              |                                                                                                         |
|-------------------------------|----------------------------------------------|---------------------------------------------------------------------------------------------------------|
| NOS3                          | Nitric oxide synthase, endothelial           | Mediating VEGF-induced angiogenesis                                                                     |
| <b>Membrane proteins</b>      |                                              |                                                                                                         |
| CD4                           | T-cell surface glycoprotein CD4              | T-cell surface glycoprotein (adaptive)                                                                  |
| CD5                           | T-cell surface glycoprotein CD5              | T-cell surface glycoprotein (adaptive)                                                                  |
| <b>Label, group</b>           | <b>Name</b>                                  | <b>Protein type</b>                                                                                     |
| CD8A                          | T-cell surface glycoprotein CD8 alpha chain  | T-cell surface glycoprotein (adaptive)                                                                  |
| CD28                          | T-cell surface glycoprotein CD28             | T-cell surface glycoprotein (adaptive)                                                                  |
| CD83                          | CD83 antigen                                 | Dendritic cell surface protein (innate)                                                                 |
| CD244                         | Natural killer cell receptor 2B4             | Glycoprotein receptor on NK, monocytes, basophils (innate)                                              |
| CRTAM                         | Cytotoxic and regulatory T-cell molecule     | T-cell molecule (innate and adaptive)                                                                   |
| ICOSLG                        | ICOS ligand                                  | T-cell surface receptor ICOS (adaptive)                                                                 |
| KLRD1                         | Natural killer cells antigen CD94            | Receptor on NK cells and some cytotoxic T-cells (for MHC class I HLA-E molecules) (innate and adaptive) |
| LAMP3                         | Lysosome-associated membrane glycoprotein 3  | Lysosome membrane protein (adaptive immunity)                                                           |
| NCR1                          | Natural cytotoxicity triggering receptor 1   | Cell surface receptor (innate immunity)                                                                 |
| MIC-A/B                       | MHC class I polypeptide-related sequence A/B | MHC class I, expressed on the cell surface of all nucleated cells and also platelets (widely expressed) |
| ADGRG1                        | Adhesion G-protein coupled receptor G1       | Receptor expressed in liver, muscle, neural, cytotoxic lymphoid cells (widely expressed)                |
| TIE2                          | Angiopoietin-1 receptor                      | Enzyme/ cell surface protein (widely expressed)                                                         |
| PD-L1                         | Programmed cell death 1 ligand 1             | Ligand of the inhibitory receptor PD-1 (adaptive immunity)                                              |
| PD-L2                         | Programmed cell death 1 ligand 2             | Ligand of the inhibitory receptor PD-2 (adaptive immunity)                                              |
| PDCD1                         | Programmed cell death protein 1              | Cell surface receptor (adaptive immunity)                                                               |
| <b>Extracellular proteins</b> |                                              |                                                                                                         |
| Gal-1                         | Galectin-1                                   | Galectin                                                                                                |
| Gal-9                         | Galectin-9                                   | Galectin                                                                                                |
| DCN                           | Decorin                                      | Proteoglycan                                                                                            |

**eTable 3. Limit of detection and coefficient of variation of 92 protein biomarkers**

| Protein   | Limit of detection (LOD) | % below LOD | Coefficient of variation (CV, %)* |             | Mean  | SD    |
|-----------|--------------------------|-------------|-----------------------------------|-------------|-------|-------|
|           | NPX units                |             | Inter-assay                       | Intra-assay |       |       |
| ADA       | 0.27                     | 0           | 8.40                              | 7.05        | 2.41  | 0.35  |
| ADGRG1    | 1.15                     | 67.40       | 12.53                             | 10.81       | 1.30  | 0.41  |
| ANG1      | 0.80                     | 0           | 15.63                             | 4.37        | 6.77  | 1.38  |
| ANGPT2    | 0.62                     | 0           | 8.18                              | 5.99        | 3.80  | 0.42  |
| ARG1      | 1.59                     | 11.60       | 10.26                             | 5.87        | 2.60  | 0.80  |
| CAIX      | 0.15                     | 0           | 9.77                              | 5.01        | 3.37  | 0.63  |
| CASP8     | 1.30                     | 0           | 13.52                             | 4.37        | 3.59  | 0.69  |
| CCL3      | 0.93                     | 0           | 7.91                              | 6.06        | 4.58  | 0.59  |
| CCL4      | 0.65                     | 0           | 11.14                             | 6.50        | 6.78  | 0.62  |
| CCL17     | 0.48                     | 0           | 12.53                             | 6.11        | 6.17  | 1.11  |
| CCL19     | 1.10                     | 0           | 8.83                              | 5.85        | 8.52  | 0.82  |
| CCL20     | 1.22                     | 0           | 13.00                             | 7.04        | 6.39  | 1.14  |
| CCL23     | 0.34                     | 0           | 10.62                             | 6.60        | 9.34  | 0.49  |
| CD4       | -1.61                    | 0           | 8.54                              | 4.93        | 0.10  | 0.34  |
| CD5       | -0.07                    | 0           | 6.40                              | 5.72        | 4.35  | 0.41  |
| CD8A      | 0.78                     | 0           | 13.06                             | 6.50        | 8.60  | 0.81  |
| CD27      | 0.39                     | 0           | 10.66                             | 6.05        | 7.52  | 0.39  |
| CD28      | 0.54                     | 5.00        | 6.77                              | 6.37        | 0.90  | 0.30  |
| CD40      | 0.81                     | 0           | 8.19                              | 5.11        | 9.88  | 0.39  |
| CD40L     | 1.51                     | 0.20        | 14.57                             | 7.35        | 3.53  | 1.07  |
| CD70      | 1.07                     | 0           | 8.40                              | 6.38        | 2.73  | 0.37  |
| CD83      | 0.11                     | 0           | 8.16                              | 6.25        | 1.73  | 0.34  |
| CD244     | 1.48                     | 0           | 7.67                              | 6.67        | 5.49  | 0.33  |
| CRTAM     | 0.75                     | 0           | 11.12                             | 6.67        | 4.06  | 0.55  |
| CSF1      | 1.01                     | 0           | 7.82                              | 6.05        | 7.00  | 0.24  |
| CX3CL1    | 1.04                     | 0           | 7.56                              | 5.27        | 5.42  | 0.40  |
| CXCL1     | 0.99                     | 0           | 13.14                             | 4.85        | 7.52  | 1.35  |
| CXCL5     | 1.56                     | 0           | 26.92                             | 7.09        | 9.04  | 2.04  |
| CXCL9     | 0.72                     | 0           | 12.17                             | 6.24        | 6.94  | 0.96  |
| CXCL10    | 0.88                     | 0           | 12.41                             | 6.84        | 7.46  | 0.81  |
| CXCL11    | 0.79                     | 0           | 9.98                              | 7.77        | 6.27  | 0.93  |
| CXCL12    | 0.92                     | 46.20       | 14.33                             | 11.25       | 1.04  | 0.23  |
| CXCL13    | 1.38                     | 0           | 9.68                              | 6.41        | 8.26  | 0.59  |
| DCN       | 0.37                     | 0           | 11.18                             | 6.04        | 3.81  | 0.26  |
| EGF       | 0.29                     | 0           | 15.54                             | 5.16        | 5.09  | 1.37  |
| FasL      | 0.48                     | 0           | 7.52                              | 5.68        | 5.92  | 0.44  |
| FGF2      | 0.48                     | 82.60       | 12.06                             | 10.07       | 0.56  | 0.30  |
| Gal1      | 1.54                     | 0           | 9.16                              | 6.64        | 5.64  | 0.25  |
| Gal9      | 0.61                     | 0           | 4.46                              | 3.11        | 7.00  | 0.34  |
| GZMA      | 0.99                     | 0.30        | 8.34                              | 5.80        | 4.91  | 0.50  |
| GZMB      | 0.76                     | 0           | 7.14                              | 5.44        | 3.09  | 0.66  |
| GZMH      | 1.60                     | 0           | 10.04                             | 5.71        | 4.37  | 0.69  |
| HGF       | 0.61                     | 0           | 7.48                              | 5.39        | 7.03  | 0.41  |
| HO1       | 1.43                     | 0           | 8.44                              | 6.74        | 11.53 | 0.42  |
| ICOSLG    | 0.90                     | 0           | 7.74                              | 5.44        | 4.57  | 0.35  |
| IFN beta  | 0.44                     | 97.80       | 11.10                             | 7.45        | 0.46  | 0.15  |
| IFN gamma | 0.76                     | 98.00       | 9.28                              | 7.61        | 0.77  | 0.07  |
| IL1 alpha | 0.42                     | 99.10       | 8.55                              | 5.46        | 0.45  | 0.35  |
| IL2       | 0.92                     | 99.80       | 19.76                             | 16.30       | 0.92  | 0.001 |
| IL4       | 1.00                     | 98.60       | 14.48                             | 11.19       | 1.01  | 0.15  |
| IL5       | 2.20                     | 70.70       | 13.83                             | 10.65       | 2.68  | 1.10  |

| Protein        | LOD       | % LOD | Coefficient of variation (CV, %)* |             | Mean      | SD   |
|----------------|-----------|-------|-----------------------------------|-------------|-----------|------|
|                | NPX units |       | Inter-assay                       | Intra-assay | NPX units |      |
| IL6            | 1.12      | 0     | 13.13                             | 8.07        | 2.59      | 0.84 |
| IL7            | 0.92      | 0     | 9.60                              | 3.16        | 3.36      | 0.99 |
| IL8            | 1.03      | 0     | 12.29                             | 5.75        | 4.31      | 0.87 |
| IL10           | 1.47      | 7.40  | 12.84                             | 10.79       | 1.98      | 0.46 |
| IL12           | 1.30      | 0     | 13.88                             | 5.60        | 5.48      | 0.71 |
| IL12RB1        | 1.10      | 1.30  | 9.91                              | 7.71        | 1.71      | 0.34 |
| IL13           | 1.43      | 99.20 | 24.12                             | 21.75       | 1.45      | 0.24 |
| IL18           | 1.64      | 0     | 9.70                              | 6.48        | 8.07      | 0.56 |
| IL21           | 1.44      | 99.80 | 13.91                             | 8.81        | 1.44      | --   |
| IL33           | 0.93      | 97.80 | 10.45                             | 8.34        | 0.94      | 0.07 |
| IL35           | 2.46      | 99.00 | 26.02                             | 22.44       | 2.46      | --   |
| KLRD1          | 0.72      | 0     | 7.90                              | 5.49        | 5.03      | 0.53 |
| LAMP3          | 1.04      | 0     | 10.70                             | 6.52        | 3.75      | 0.70 |
| LAP TGF-beta-1 | -0.71     | 0     | 7.96                              | 5.96        | 0.38      | 0.37 |
| MCP1           | 0.66      | 0     | 10.49                             | 6.52        | 9.21      | 0.51 |
| MCP2           | 0.90      | 0     | 11.55                             | 6.21        | 6.49      | 0.92 |
| MCP3           | 1.22      | 32.90 | 12.66                             | 10.37       | 1.49      | 0.34 |
| MCP4           | 0.13      | 0     | 11.51                             | 7.58        | 6.54      | 0.82 |
| MIC-A/B        | 0.55      | 23.40 | 8.17                              | 5.06        | 2.94      | 1.47 |
| MMP12          | 0.48      | 0     | 9.71                              | 5.04        | 6.81      | 0.69 |
| MMP7           | 1.56      | 0.80  | 13.41                             | 6.52        | 8.43      | 1.44 |
| NCR1           | 1.70      | 0     | 8.57                              | 7.14        | 3.28      | 0.43 |
| NOS3           | 1.38      | 59.70 | 16.03                             | 10.75       | 1.48      | 0.18 |
| PD L1          | 1.80      | 0     | 12.00                             | 9.02        | 4.08      | 0.47 |
| PD L2          | 0.73      | 0.20  | 14.50                             | 7.47        | 1.61      | 0.29 |
| PDCD1          | 1.43      | 0.20  | 10.21                             | 9.06        | 2.73      | 0.59 |
| PDGF subunit B | 0.16      | 0     | 9.38                              | 6.90        | 8.78      | 1.25 |
| PGF            | 0.70      | 0     | 9.80                              | 6.78        | 7.68      | 0.35 |
| PTN            | 0.08      | 27.90 | 18.50                             | 10.34       | 0.64      | 0.72 |
| TIE2           | 0.55      | 0     | 6.71                              | 5.66        | 6.89      | 0.28 |
| TNF            | 1.80      | 94.20 | 12.80                             | 10.43       | 1.88      | 0.53 |
| TNFRSF4        | 1.55      | 0     | 9.79                              | 6.05        | 2.64      | 0.37 |
| TNFRSF9        | -0.39     | 0     | 7.77                              | 5.86        | 4.65      | 0.47 |
| TNFRSF12A      | 0.50      | 0     | 10.93                             | 8.15        | 5.20      | 0.49 |
| TNFRSF21       | 0.14      | 0     | 6.62                              | 4.44        | 7.22      | 0.24 |
| TNFSF14        | 0.31      | 0     | 7.70                              | 5.07        | 2.47      | 0.52 |
| TRAIL          | 0.16      | 0     | 7.87                              | 5.18        | 7.28      | 0.34 |
| TWEAK          | -0.42     | 0     | 8.01                              | 5.89        | 7.99      | 0.32 |
| VEGFA          | 0.76      | 0     | 9.08                              | 5.75        | 7.46      | 0.43 |
| VEGFC          | -0.28     | 27.70 | 14.91                             | 12.70       | 0.26      | 0.61 |
| VEGFR2         | 0.07      | 0     | 7.32                              | 5.00        | 6.34      | 0.27 |

\* Coefficient of variation was calculated using  $2^{\wedge}NPX$ .

**eTable 4. Genetic variants associated with BMI in the GIANT consortium**

| SNP        | UKB+GIANT             |      | CKB (orientated to BMI-increasing allele in CEU) |               |       |          | BBJ (orientated to BMI-increasing allele in CEU) |               |       |         |
|------------|-----------------------|------|--------------------------------------------------|---------------|-------|----------|--------------------------------------------------|---------------|-------|---------|
|            | BMI-increasing allele | EAF  | EAF                                              | SD difference | SE    | p-value  | EAF                                              | SD difference | SE    | p-value |
| rs1000096  | C                     | 0.38 | 0.19                                             | 0.001         | 0.006 | 0.913    | 0.17                                             | -0.004        | 0.005 | 0.443   |
| rs10002111 | A                     | 0.22 | 0.04                                             | 0.011         | 0.011 | 0.326    | 0.06                                             | 0.012         | 0.007 | 0.108   |
| rs1000940  | G                     | 0.28 | 0.38                                             | 0.004         | 0.004 | 0.38     | 0.58                                             | 0.009         | 0.004 | 0.016   |
| rs10044136 | G                     | 0.57 | 0.03                                             | -0.009        | 0.012 | 0.447    | 0.03                                             | 0.011         | 0.011 | 0.355   |
| rs1006893  | C                     | 0.76 | 0.71                                             | -0.019        | 0.005 | 4.54E-05 | 0.76                                             | 0.016         | 0.004 | <5E-08  |
| rs1009188  | T                     | 0.71 | 0.86                                             | 0.011         | 0.006 | 0.0682   | 0.83                                             | -0.024        | 0.005 | <5E-08  |
| rs10092723 | C                     | 0.25 | 0.23                                             | -0.004        | 0.005 | 0.387    | 0.26                                             | 0.005         | 0.004 | 0.275   |
| rs10099330 | G                     | 0.54 | 0.5                                              | -0.011        | 0.004 | 0.0113   | 0.54                                             | 0.001         | 0.004 | 0.812   |
| rs10101364 | T                     | 0.68 | 0.99                                             | 0.021         | 0.02  | 0.28     | 0.98                                             | -0.022        | 0.013 | 0.086   |
| rs10116186 | G                     | 0.46 | 0.79                                             | -0.007        | 0.005 | 0.161    | 0.80                                             | 0.010         | 0.004 | 0.029   |
| rs10132280 | C                     | 0.31 | 0.09                                             | -0.024        | 0.008 | 0.00157  | 0.07                                             | 0.018         | 0.007 | 0.01    |
| rs10197031 | C                     | 0.27 | 0.41                                             | -0.014        | 0.005 | 0.00235  | 0.54                                             | 0.009         | 0.004 | 0.015   |
| rs10198345 | C                     | 0.66 | 0.75                                             | 0.006         | 0.005 | 0.213    | 0.72                                             | -0.001        | 0.004 | 0.736   |
| rs10203386 | A                     | 0.45 | 0.43                                             | 0.034         | 0.004 | 3.78E-15 | 0.47                                             | -0.023        | 0.004 | <5E-08  |
| rs10269783 | A                     | 0.42 | 0.6                                              | 0.013         | 0.004 | 0.00208  | 0.58                                             | -0.015        | 0.004 | <5E-08  |
| rs1030015  | T                     | 0.54 | 0.34                                             | 0.012         | 0.004 | 0.0062   | 0.38                                             | -0.005        | 0.004 | 0.205   |
| rs1031670  | C                     | 0.52 | 0.47                                             | -0.008        | 0.004 | 0.0593   | 0.58                                             | 0.000         | 0.004 | 0.89    |
| rs1035010  | T                     | 0.25 | 0.29                                             | 0.007         | 0.005 | 0.125    | 0.28                                             | -0.023        | 0.004 | <5E-08  |
| rs1038088  | G                     | 0.49 | 0.68                                             | -0.014        | 0.005 | 0.00265  | 0.68                                             | 0.016         | 0.004 | <5E-08  |
| rs10402145 | A                     | 0.3  | 0.13                                             | 0.005         | 0.006 | 0.413    | 0.17                                             | 0.004         | 0.005 | 0.366   |
| rs1045411  | C                     | 0.28 | 0.2                                              | -0.009        | 0.005 | 0.0984   | 0.15                                             | 0.002         | 0.005 | 0.736   |
| rs1048303  | C                     | 0.58 | 0.43                                             | -0.009        | 0.004 | 0.0441   | 0.33                                             | 0.010         | 0.004 | 0.011   |
| rs10497870 | A                     | 0.61 | 0.33                                             | 0.008         | 0.004 | 0.071    | 0.30                                             | -0.003        | 0.004 | 0.385   |
| rs10498767 | G                     | 0.45 | 0.38                                             | -0.01         | 0.005 | 0.0287   | 0.40                                             | 0.008         | 0.004 | 0.033   |

|            |   |      |  |       |        |       |          |          |        |         |          |
|------------|---|------|--|-------|--------|-------|----------|----------|--------|---------|----------|
| rs10498891 | T | 0.93 |  | 0.99  | 0.068  | 0.061 | 0.27     | Low MAF* |        |         |          |
| rs10499276 | T | 0.11 |  | 0.06  | 0.015  | 0.009 | 0.0963   | 0.05     | -0.008 | 0.009   | 0.377    |
| rs10499694 | A | 0.49 |  | 0.61  | 0.006  | 0.004 | 0.149    | 0.60     | -0.005 | 0.004   | 0.214    |
| rs10510419 | G | 0.15 |  | 0.003 | 0.05   | 0.044 | 0.263    | Low MAF* |        |         |          |
| rs10518269 | C | 0.17 |  | 0.001 | -0.031 | 0.022 | 0.155    | Low MAF* |        |         |          |
| rs10744146 | G | 0.54 |  | 0.68  | -0.013 | 0.005 | 0.00542  | 0.69     | 0.015  | 0.004   | <5E-08   |
| rs1075901  | C | 0.45 |  | 0.79  | -0.011 | 0.005 | 0.0276   | 0.74     | 0.011  | 0.004   | 0.53     |
| rs10761247 | G | 0.59 |  | 0.44  | 0.004  | 0.004 | 0.344    | 0.54     | 0.011  | 0.004   | 0.001    |
| rs10761785 | G | 0.51 |  | 0.66  | -0.011 | 0.004 | 0.0153   | 0.69     | 0.000  | 0.00393 | 0.001465 |
| rs10783779 | T | 0.6  |  | 0.7   | -0.001 | 0.005 | 0.812    | 0.66     | 0.002  | 0.004   | 0.593    |
| rs10792006 | T | 0.45 |  | 0.71  | 0.006  | 0.005 | 0.183    | 0.66     | -0.004 | 0.004   | 0.257    |
| rs10797987 | C | 0.51 |  | 0.32  | -0.003 | 0.005 | 0.557    | 0.38     | 0.010  | 0.004   | 0.008    |
| rs10823893 | A | 0.41 |  | 0.08  | 0.001  | 0.008 | 0.9      | 0.04     | -0.002 | 0.009   | 0.825    |
| rs10840606 | G | 0.82 |  | 0.95  | -0.023 | 0.01  | 0.0156   | 0.96     | 0.032  | 0.009   | 0.001    |
| rs10850185 | A | 0.3  |  | 0.4   | 0.014  | 0.004 | 0.00112  | 0.36     | -0.006 | 0.004   | 0.13     |
| rs10850777 | A | 0.44 |  | 0.43  | -0.004 | 0.004 | 0.368    | 0.43     | -0.010 | 0.004   | 0.005    |
| rs10858334 | G | 0.85 |  | 0.9   | -0.011 | 0.007 | 0.111    | 0.88     | -0.001 | 0.006   | 0.815    |
| rs10871589 | G | 0.68 |  | 0.64  | -0.009 | 0.004 | 0.0394   | 0.62     | 0.016  | 0.004   | <5E-08   |
| rs10886017 | A | 0.24 |  | 0.4   | 0.005  | 0.004 | 0.28     | 0.36     | -0.006 | 0.004   | 0.125    |
| rs10887584 | A | 0.45 |  | 0.27  | 0.017  | 0.005 | 0.000262 | 0.36     | -0.002 | 0.004   | 0.627    |
| rs10892873 | C | 0.36 |  | 0.18  | 0.009  | 0.006 | 0.0954   | 0.05     | -0.006 | 0.008   | 0.358    |
| rs10896012 | C | 0.78 |  | 0.85  | 0.009  | 0.006 | 0.133    | 0.82     | 0.002  | 0.005   | 0.716    |
| rs10920678 | A | 0.43 |  | 0.34  | 0.01   | 0.004 | 0.0219   | 0.35     | -0.021 | 0.004   | <5E-08   |
| rs10923724 | C | 0.56 |  | 0.6   | -0.006 | 0.004 | 0.169    | 0.61     | 0.015  | 0.004   | <5E-08   |
| rs10929925 | C | 0.41 |  | 0.39  | -0.016 | 0.004 | 0.00021  | 0.42     | 0.006  | 0.004   | 0.103    |
| rs10930502 | A | 0.69 |  | 0.31  | -0.003 | 0.005 | 0.585    | 0.29     | -0.002 | 0.004   | 0.606    |
| rs10937094 | A | 0.71 |  | 0.87  | 0.004  | 0.006 | 0.512    | 0.77     | -0.002 | 0.004   | 0.693    |
| rs10938397 | G | 0.57 |  | 0.7   | -0.037 | 0.005 | 1.45E-15 | 0.7      | 0.028  | 0.004   | <5E-08   |
| rs10942267 | A | 0.69 |  | 0.82  | 0.008  | 0.005 | 0.134    | 0.85     | -0.017 | 0.005   | 0.001    |



|             |   |      |      |        |       |          |          |        |       |        |
|-------------|---|------|------|--------|-------|----------|----------|--------|-------|--------|
| rs10950289  | A | 0.84 | 0.76 | -0.005 | 0.005 | 0.382    | 0.76     | -0.001 | 0.005 | 0.84   |
| rs10954772  | T | 0.32 | 0.04 | -0.015 | 0.011 | 0.192    | Low MAF* |        |       |        |
| rs10965780  | G | 0.41 | 0.15 | -0.008 | 0.006 | 0.191    | 0.27     | 0.019  | 0.004 | <5E-08 |
| rs10971721  | C | 0.1  | 0.01 | 0.04   | 0.025 | 0.117    | Low MAF* |        |       |        |
| rs10984756  | G | 0.91 | 0.99 | 0.086  | 0.032 | 0.00761  | Low MAF* |        |       |        |
| rs10985968  | C | 0.5  | 0.52 | 0.003  | 0.004 | 0.531    | 0.57     | -0.002 | 0.004 | 0.673  |
| rs11001963  | T | 0.55 | 0.34 | 0.01   | 0.005 | 0.0389   | 0.35     | -0.013 | 0.004 | <5E-08 |
| rs11047132  | G | 0.92 | 0.78 | -0.002 | 0.005 | 0.656    | 0.71     | 0.007  | 0.004 | 0.078  |
| rs1106761   | A | 0.37 | 0.16 | 0      | 0.006 | 0.98     | 0.14     | -0.017 | 0.005 | 0.001  |
| rs1106908   | G | 0.45 | 0.33 | -0.016 | 0.004 | 0.000402 | 0.41     | 0.014  | 0.004 | <5E-08 |
| rs11074446  | T | 0.85 | 0.73 | 0.035  | 0.005 | 1.10E-13 | 0.72     | -0.030 | 0.005 | <5E-08 |
| rs11075489  | C | 0.47 | 0.55 | -0.009 | 0.004 | 0.0437   | 0.58     | 0.003  | 0.004 | 0.42   |
| rs11105839  | T | 0.37 | 0.5  | -0.019 | 0.004 | 2.24E-05 | 0.48     | 0.013  | 0.004 | <5E-08 |
| rs11115176  | T | 0.78 | 0.79 | 0.001  | 0.005 | 0.824    | 0.84     | -0.001 | 0.005 | 0.888  |
| rs11121210  | C | 0.34 | 0.17 | -0.003 | 0.006 | 0.57     | 0.16     | 0.010  | 0.005 | 0.039  |
| rs11126822  | A | 0.31 | 0.16 | 0.012  | 0.006 | 0.0359   | 0.2      | -0.002 | 0.004 | 0.685  |
| rs11138313  | A | 0.9  | 0.99 | -0.009 | 0.053 | 0.865    | Low MAF* |        |       |        |
| rs11158434  | A | 0.2  | 0.42 | 0.003  | 0.004 | 0.485    | 0.55     | -0.003 | 0.004 | 0.331  |
| rs11170468  | A | 0.78 | 0.99 | 0.026  | 0.021 | 0.204    | Low MAF* |        |       |        |
| rs11181001  | A | 0.48 | 0.41 | 0.002  | 0.004 | 0.629    | 0.4      | -0.008 | 0.004 | 0.029  |
| rs11185111  | G | 0.29 | 0.47 | -0.004 | 0.004 | 0.406    | 0.5      | 0.008  | 0.004 | 0.018  |
| rs1119950   | G | 0.57 | 0.3  | -0.015 | 0.005 | 0.00121  | 0.45     | 0.006  | 0.004 | 0.12   |
| rs11218510  | G | 0.39 | 0.28 | -0.006 | 0.005 | 0.233    | 0.26     | 0.008  | 0.004 | 0.049  |
| rs112566467 | T | 0.21 | 0.19 | 0.012  | 0.005 | 0.0207   | 0.17     | -0.008 | 0.005 | 0.12   |
| rs113397893 | G | 0.92 | 0.99 | -0.144 | 0.096 | 0.131    | Low MAF* |        |       |        |
| rs11525873  | T | 0.9  | 0.75 | 0.02   | 0.005 | 6.56E-05 | 0.64     | -0.013 | 0.004 | 0.001  |
| rs11577094  | T | 0.08 | 0.01 | 0.009  | 0.024 | 0.697    | Low MAF* |        |       |        |
| rs11608710  | G | 0.94 | 0.99 | -0.329 | 0.141 | 0.0191   | Low MAF* |        |       |        |
| rs11611246  | T | 0.2  | 0.33 | 0.014  | 0.005 | 0.0016   | 0.3      | -0.002 | 0.004 | 0.565  |

|            |   |      |        |        |       |          |          |        |       |        |
|------------|---|------|--------|--------|-------|----------|----------|--------|-------|--------|
| rs11629783 | C | 0.77 | 0.86   | 0.009  | 0.006 | 0.146    | 0.93     | -0.026 | 0.007 | <5E-08 |
| rs11633626 | C | 0.63 | 0.68   | -0.007 | 0.004 | 0.107    | 0.72     | 0.006  | 0.004 | 0.101  |
| rs11636611 | T | 0.5  | 0.8    | 0.007  | 0.005 | 0.193    | 0.82     | -0.003 | 0.005 | 0.482  |
| rs11638950 | A | 0.59 | 0.71   | 0.008  | 0.005 | 0.0818   | 0.71     | -0.006 | 0.004 | 0.137  |
| rs11649864 | A | 0.09 | 0.01   | 0.037  | 0.031 | 0.229    | Low MAF* |        |       |        |
| rs11655587 | C | 0.36 | 0.17   | -0.011 | 0.006 | 0.0537   | 0.17     | 0.014  | 0.005 | 0.005  |
| rs11672660 | C | 0.19 | 0.19   | -0.024 | 0.005 | 6.43E-06 | 0.23     | 0.025  | 0.004 | <5E-08 |
| rs1167821  | T | 0.55 | 0.95   | -0.02  | 0.01  | 0.0408   | Low MAF* |        |       |        |
| rs11692326 | T | 0.23 | 0.11   | 0.022  | 0.007 | 0.00125  | 0.16     | -0.016 | 0.005 | 0.001  |
| rs11702843 | A | 0.25 | 0.03   | 0.008  | 0.012 | 0.52     | 0.03     | -0.004 | 0.011 | 0.753  |
| rs11739877 | T | 0.62 | 0.55   | -0.003 | 0.004 | 0.415    | 0.6      | -0.001 | 0.004 | 0.758  |
| rs11757278 | T | 0.7  | 0.38   | 0.011  | 0.004 | 0.0105   | 0.49     | -0.009 | 0.004 | 0.008  |
| rs11761528 | C | 0.09 | 0.0001 | -0.033 | 0.059 | 0.571    | Low MAF* |        |       |        |
| rs11781222 | T | 0.85 | 0.72   | 0.001  | 0.005 | 0.805    | 0.70     | -0.008 | 0.004 | 0.038  |
| rs11836108 | A | 0.3  | 0.19   | 0.01   | 0.005 | 0.0655   | 0.17     | -0.011 | 0.005 | 0.027  |
| rs11856579 | G | 0.26 | 0.03   | -0.006 | 0.013 | 0.644    | 0.01     | 0.017  | 0.018 | 0.337  |
| rs11866815 | C | 0.26 | 0.21   | -0.011 | 0.005 | 0.0314   | 0.20     | 0.000  | 0.004 | 0.963  |
| rs1187352  | C | 0.34 | 0.18   | -0.013 | 0.005 | 0.0188   | 0.17     | 0.010  | 0.005 | 0.039  |
| rs11874040 | A | 0.71 | 0.49   | 0.006  | 0.004 | 0.136    | 0.57     | -0.008 | 0.004 | 0.025  |
| rs11915371 | C | 0.8  | 0.93   | 0.009  | 0.008 | 0.245    | 0.97     | 0.006  | 0.01  | 0.567  |
| rs11931941 | A | 0.22 | 0.39   | 0.011  | 0.004 | 0.015    | 0.36     | 0.0001 | 0.004 | 0.934  |
| rs11971098 | G | 0.91 | 0.99   | -0.022 | 0.032 | 0.496    | Low MAF* |        |       |        |
| rs1199334  | A | 0.19 | 0.03   | 0.027  | 0.012 | 0.0308   | 0.04     | -0.024 | 0.009 | 0.01   |
| rs11997238 | G | 0.91 | 0.83   | -0.011 | 0.006 | 0.0532   | 0.84     | 0.012  | 0.005 | 0.012  |
| rs12022461 | G | 0.17 | 0.21   | -0.015 | 0.005 | 0.00347  | 0.15     | 0.013  | 0.005 | 0.008  |
| rs12049202 | T | 0.19 | 0.36   | -0.005 | 0.004 | 0.293    | 0.39     | -0.005 | 0.004 | 0.212  |
| rs12072739 | G | 0.78 | 0.92   | 0.009  | 0.007 | 0.241    | 0.97     | 0.013  | 0.01  | 0.205  |
| rs12098284 | T | 0.12 | 0.13   | -0.004 | 0.006 | 0.499    | 0.12     | -0.004 | 0.006 | 0.468  |
| rs12121950 | T | 0.34 | 0.76   | 0.009  | 0.005 | 0.0652   | 0.65     | -0.013 | 0.004 | 0.001  |

|            |   |      |        |        |       |          |          |        |         |          |
|------------|---|------|--------|--------|-------|----------|----------|--------|---------|----------|
| rs12147845 | T | 0.11 | 0.0001 | 0.006  | 0.039 | 0.875    | Low MAF* |        |         |          |
| rs12151152 | G | 0.41 | 0.31   | -0.027 | 0.005 | 9.49E-09 | Low MAF* |        |         |          |
| rs12193797 | A | 0.87 | 0.99   | -0.017 | 0.022 | 0.431    | Low MAF* |        |         |          |
| rs12206094 | C | 0.29 | 0.2    | -0.02  | 0.005 | 0.000148 | 0.17     | 0.015  | 0.005   | 0.002    |
| rs12209887 | A | 0.46 | 0.29   | 0.019  | 0.005 | 4.50E-05 | 0.27     | -0.004 | 0.004   | 0.359    |
| rs12222235 | C | 0.33 | 0.16   | -0.014 | 0.006 | 0.0182   | 0.09     | 0.002  | 0.006   | 0.725    |
| rs12238336 | C | 0.38 | 0.43   | -0.004 | 0.004 | 0.299    | 0.34     | 0.001  | 0.004   | 0.703    |
| rs12282785 | C | 0.22 | 0.17   | 0.003  | 0.006 | 0.615    | 0.15     | 0.004  | 0.005   | 0.427    |
| rs12286929 | G | 0.5  | 0.73   | -0.01  | 0.005 | 0.027    | 0.80     | 0.015  | 0.005   | 0.001    |
| rs12316047 | G | 0.24 | 0.01   | -0.057 | 0.05  | 0.252    | Low MAF* |        |         |          |
| rs12321904 | T | 0.5  | 0.24   | 0      | 0.005 | 0.978    | 0.23     | -0.005 | 0.004   | 0.221    |
| rs12336441 | A | 0.62 | 0.99   | -0.008 | 0.027 | 0.775    | Low MAF* |        |         |          |
| rs12364470 | G | 0.85 | 0.99   | -0.049 | 0.027 | 0.0646   | Low MAF* |        |         |          |
| rs12422552 | G | 0.27 | 0.3    | 0.001  | 0.005 | 0.812    | 0.24     | -0.006 | 0.004   | 0.152    |
| rs12429545 | A | 0.12 | 0.25   | 0.034  | 0.005 | 1.97E-12 | 0.22     | -0.031 | 0.004   | <5E-08   |
| rs12431682 | C | 0.34 | 0.46   | -0.003 | 0.004 | 0.501    | 0.49     | 0.009  | 0.004   | 0.014    |
| rs12438629 | C | 0.97 | 0.87   | 0.024  | 0.006 | 0.000127 | 0.85     | -0.018 | 0.005   | <5E-08   |
| rs12439798 | T | 0.44 | 0.3    | 0.007  | 0.005 | 0.157    | 0.3      | -0.009 | 0.004   | 0.023    |
| rs12446632 | G | 0.14 | 0.0001 | -0.123 | 0.071 | 0.0834   | Low MAF* |        |         |          |
| rs12448257 | A | 0.22 | 0.28   | 0.029  | 0.005 | 1.29E-09 | 0.3      | -0.023 | 0.004   | <5E-08   |
| rs12449219 | G | 0.86 | 0.92   | -0.022 | 0.008 | 0.00469  | 0.88     | 0.007  | 0.006   | 0.21     |
| rs12449442 | A | 0.22 | 0.61   | 0.019  | 0.004 | 9.08E-06 | 0.7      | -0.021 | 0.004   | <5E-08   |
| rs12454712 | C | 0.62 | 0.55   | -0.016 | 0.004 | 0.000168 | 0.52     | 0.019  | 0.004   | <5E-08   |
| rs12462975 | A | 0.32 | 0.19   | 0.004  | 0.006 | 0.437    | 0.23     | -0.009 | 0.004   | 0.037    |
| rs12470698 | A | 0.57 | 0.8    | 0.01   | 0.005 | 0.0636   | 0.77     | -0.011 | 0.004   | 0.016    |
| rs12488237 | C | 0.94 | 0.94   | 0.003  | 0.008 | 0.737    | 0.93     | 0.012  | 0.007   | 0.1      |
| rs12509234 | C | 0.72 | 0.63   | -0.009 | 0.004 | 0.0377   | 0.94     | 0.0001 | 0.00371 | 0.009134 |
| rs12522567 | T | 0.49 | 0.17   | 0.007  | 0.006 | 0.236    | 0.15     | -0.007 | 0.005   | 0.165    |
| rs12546331 | T | 0.51 | 0.6    | 0.005  | 0.004 | 0.267    | 0.63     | -0.014 | 0.004   | <5E-08   |

|            |   |      |      |        |       |          |      |        |       |        |
|------------|---|------|------|--------|-------|----------|------|--------|-------|--------|
| rs12551906 | G | 0.29 | 0.09 | -0.001 | 0.007 | 0.838    | 0.1  | 0.010  | 0.006 | 0.097  |
| rs12628051 | T | 0.64 | 0.6  | 0.018  | 0.004 | 3.23E-05 | 0.53 | -0.024 | 0.004 | <5E-08 |
| rs12628891 | C | 0.32 | 0.46 | -0.003 | 0.004 | 0.514    | 0.41 | 0.002  | 0.004 | 0.613  |
| rs12635553 | A | 0.49 | 0.92 | 0.007  | 0.008 | 0.399    | 0.85 | -0.003 | 0.005 | 0.563  |
| rs1263627  | T | 0.76 | 0.59 | -0.008 | 0.004 | 0.0599   | 0.68 | 0.006  | 0.004 | 0.114  |
| rs12651833 | C | 0.81 | 0.57 | 0.002  | 0.004 | 0.658    | 0.42 | -0.007 | 0.004 | 0.046  |
| rs12680842 | A | 0.68 | 0.51 | 0.013  | 0.004 | 0.00312  | 0.5  | -0.019 | 0.004 | <5E-08 |
| rs12681792 | A | 0.2  | 0.28 | 0.007  | 0.005 | 0.151    | 0.31 | -0.001 | 0.004 | 0.759  |
| rs1269175  | A | 0.51 | 0.86 | 0.011  | 0.006 | 0.0873   | 0.81 | -0.009 | 0.005 | 0.047  |
| rs12692596 | T | 0.36 | 0.26 | -0.003 | 0.005 | 0.519    | 0.34 | 0.003  | 0.004 | 0.374  |
| rs12705916 | C | 0.62 | 0.71 | -0.005 | 0.005 | 0.277    | 0.69 | 0.007  | 0.004 | 0.086  |
| rs12714199 | C | 0.61 | 0.79 | -0.01  | 0.005 | 0.0423   | 0.67 | 0.004  | 0.004 | 0.334  |
| rs12765914 | T | 0.08 | 0.25 | 0.016  | 0.005 | 0.00149  | 0.18 | -0.016 | 0.005 | 0.001  |
| rs1277733  | T | 0.77 | 0.76 | 0.014  | 0.005 | 0.00425  | 0.66 | -0.017 | 0.004 | <5E-08 |
| rs1285245  | G | 0.39 | 0.34 | -0.014 | 0.004 | 0.0015   | 0.33 | 0.018  | 0.004 | <5E-08 |
| rs12868881 | A | 0.41 | 0.41 | 0.013  | 0.004 | 0.00259  | 0.39 | -0.003 | 0.004 | 0.352  |
| rs12885454 | C | 0.36 | 0.56 | -0.013 | 0.004 | 0.0019   | 0.52 | 0.001  | 0.004 | 0.848  |
| rs12889085 | G | 0.58 | 0.81 | -0.009 | 0.005 | 0.0993   | 0.83 | 0.007  | 0.005 | 0.149  |
| rs12890931 | G | 0.63 | 0.36 | -0.002 | 0.004 | 0.572    | 0.38 | 0.002  | 0.004 | 0.646  |
| rs12899905 | C | 0.26 | 0.04 | -0.017 | 0.011 | 0.115    | 0.03 | 0.027  | 0.011 | 0.01   |
| rs12912380 | C | 0.11 | 0.05 | -0.014 | 0.01  | 0.165    | 0.03 | 0.014  | 0.011 | 0.196  |
| rs12914623 | G | 0.27 | 0.14 | -0.002 | 0.006 | 0.767    | 0.14 | 0.012  | 0.006 | 0.035  |
| rs12922346 | C | 0.26 | 0.16 | 0.014  | 0.006 | 0.0153   | 0.2  | 0.014  | 0.005 | 0.003  |
| rs12939549 | A | 0.56 | 0.7  | 0.02   | 0.005 | 1.39E-05 | 0.65 | -0.008 | 0.004 | 0.041  |
| rs13002946 | T | 0.27 | 0.55 | 0      | 0.004 | 0.915    | 0.46 | 0.002  | 0.004 | 0.59   |
| rs13021737 | G | 0.16 | 0.09 | -0.082 | 0.007 | 4.38E-28 | 0.1  | 0.049  | 0.006 | <5E-08 |
| rs13033310 | A | 0.25 | 0.31 | 0.007  | 0.005 | 0.139    | 0.31 | 0.004  | 0.004 | 0.241  |
| rs13062093 | G | 0.63 | 0.85 | 0.005  | 0.006 | 0.442    | 0.85 | -0.003 | 0.005 | 0.573  |
| rs13110266 | G | 0.4  | 0.51 | 0.001  | 0.004 | 0.771    | 0.45 | 0.0001 | 0.004 | 0.975  |

|            |   |      |      |        |       |          |          |        |       |        |
|------------|---|------|------|--------|-------|----------|----------|--------|-------|--------|
| rs13155259 | G | 0.67 | 0.9  | 0.007  | 0.007 | 0.332    | 0.92     | 0.0001 | 0.007 | 0.962  |
| rs13174863 | G | 0.85 | 0.95 | -0.003 | 0.01  | 0.794    | 0.94     | 0.025  | 0.008 | 0.001  |
| rs13191362 | A | 0.86 | 0.99 | 0.017  | 0.056 | 0.768    | Low MAF* |        |       |        |
| rs1320251  | C | 0.46 | 0.58 | -0.012 | 0.004 | 0.00743  | 0.66     | 0.013  | 0.004 | 0.001  |
| rs13209872 | G | 0.35 | 0.45 | 0      | 0.004 | 0.995    | 0.36     | 0.009  | 0.004 | 0.018  |
| rs13264909 | A | 0.57 | 0.34 | 0      | 0.004 | 0.955    | 0.28     | -0.001 | 0.004 | 0.89   |
| rs13298062 | A | 0.81 | 0.99 | 0.031  | 0.02  | 0.12     | 0.94     | -0.008 | 0.007 | 0.288  |
| rs13299788 | C | 0.85 | 0.83 | 0.002  | 0.006 | 0.774    | 0.80     | -0.015 | 0.004 | <5E-08 |
| rs13303252 | T | 0.18 | 0.4  | 0.004  | 0.004 | 0.316    | 0.36     | 0.003  | 0.004 | 0.403  |
| rs13417156 | C | 0.42 | 0.34 | -0.007 | 0.004 | 0.139    | 0.29     | 0.005  | 0.004 | 0.172  |
| rs13432055 | C | 0.71 | 0.95 | -0.009 | 0.01  | 0.352    | 0.95     | 0.017  | 0.009 | 0.053  |
| rs1346841  | G | 0.41 | 0.55 | -0.012 | 0.004 | 0.008    | 0.6      | 0.007  | 0.004 | 0.07   |
| rs1355459  | A | 0.32 | 0.09 | -0.002 | 0.008 | 0.783    | 0.04     | -0.010 | 0.009 | 0.23   |
| rs1356506  | T | 0.63 | 0.5  | 0.019  | 0.004 | 9.61E-06 | 0.61     | -0.017 | 0.004 | <5E-08 |
| rs1363695  | C | 0.24 | 0.21 | -0.006 | 0.005 | 0.241    | 0.16     | 0.0001 | 0.005 | 0.993  |
| rs1383592  | A | 0.21 | 0.22 | 0.005  | 0.005 | 0.377    | 0.14     | -0.004 | 0.005 | 0.426  |
| rs1394879  | C | 0.4  | 0.12 | 0.006  | 0.006 | 0.385    | 0.05     | -0.016 | 0.008 | 0.042  |
| rs1409818  | T | 0.11 | 0.15 | 0.011  | 0.006 | 0.0735   | 0.13     | -0.011 | 0.005 | 0.036  |
| rs1411431  | A | 0.16 | 0.27 | 0.011  | 0.005 | 0.0211   | 0.35     | -0.016 | 0.004 | <5E-08 |
| rs1417665  | T | 0.8  | 0.9  | 0.005  | 0.007 | 0.506    | 0.95     | 0.002  | 0.008 | 0.839  |
| rs1426652  | A | 0.17 | 0.31 | 0.021  | 0.005 | 6.92E-06 | 0.32     | -0.004 | 0.004 | 0.277  |
| rs1431659  | A | 0.27 | 0.31 | 0.001  | 0.005 | 0.893    | 0.29     | -0.009 | 0.004 | 0.026  |
| rs1436344  | C | 0.57 | 0.36 | 0.004  | 0.004 | 0.337    | 0.35     | -0.011 | 0.004 | 0.004  |
| rs1437842  | G | 0.49 | 0.31 | -0.002 | 0.005 | 0.6      | 0.33     | 0.011  | 0.004 | 0.003  |
| rs1451077  | G | 0.42 | 0.41 | -0.007 | 0.004 | 0.118    | 0.32     | 0.006  | 0.004 | 0.122  |
| rs1451109  | G | 0.68 | 0.54 | -0.002 | 0.004 | 0.641    | 0.47     | 0.002  | 0.004 | 0.592  |
| rs1452075  | T | 0.73 | 0.71 | 0.007  | 0.005 | 0.119    | 0.8      | 0.001  | 0.004 | 0.289  |
| rs1460676  | C | 0.82 | 0.62 | -0.005 | 0.004 | 0.23     | 0.6      | 0.009  | 0.004 | 0.015  |
| rs1470545  | T | 0.04 | 0.01 | 0.037  | 0.038 | 0.327    | Low MAF* |        |       |        |

|            |   |      |      |        |       |          |          |        |       |        |
|------------|---|------|------|--------|-------|----------|----------|--------|-------|--------|
| rs1471212  | A | 0.47 | 0.91 | -0.003 | 0.007 | 0.652    | 0.96     | -0.007 | 0.009 | 0.44   |
| rs1477890  | G | 0.49 | 0.5  | -0.004 | 0.004 | 0.318    | 0.47     | 0.007  | 0.004 | 0.044  |
| rs1481012  | A | 0.89 | 0.71 | 0.012  | 0.005 | 0.0109   | 0.7      | -0.012 | 0.004 | 0.002  |
| rs1491905  | T | 0.53 | 0.74 | 0.011  | 0.005 | 0.0212   | 0.7      | -0.011 | 0.004 | 0.005  |
| rs1501673  | A | 0.14 | 0.49 | 0.023  | 0.004 | 4.18E-08 | 0.44     | -0.020 | 0.004 | <5E-08 |
| rs1506662  | A | 0.53 | 0.62 | 0.005  | 0.004 | 0.26     | 0.66     | -0.002 | 0.004 | 0.658  |
| rs1514177  | C | 0.43 | 0.77 | 0.032  | 0.005 | 1.01E-10 | 0.83     | -0.017 | 0.005 | <5E-08 |
| rs1522569  | T | 0.82 | 0.99 | 0.037  | 0.032 | 0.256    | Low MAF* |        |       |        |
| rs1523768  | G | 0.67 | 0.83 | -0.011 | 0.006 | 0.0556   | 0.82     | -0.002 | 0.005 | 0.675  |
| rs1536053  | C | 0.31 | 0.05 | 0.016  | 0.01  | 0.106    | 0.02     | 0.018  | 0.011 | 0.108  |
| rs1541777  | G | 0.54 | 0.85 | -0.004 | 0.006 | 0.485    | 0.88     | 0.008  | 0.005 | 0.145  |
| rs1546924  | T | 0.5  | 0.34 | 0.002  | 0.005 | 0.695    | 0.38     | -0.007 | 0.004 | 0.079  |
| rs1554194  | C | 0.5  | 0.53 | 0.023  | 0.004 | 6.27E-08 | 0.5      | 0.009  | 0.004 | 0.019  |
| rs1561554  | G | 0.61 | 0.92 | -0.006 | 0.007 | 0.416    | 0.94     | 0.004  | 0.008 | 0.593  |
| rs1580099  | C | 0.58 | 0.68 | -0.013 | 0.005 | 0.00305  | 0.74     | 0.014  | 0.004 | 0.001  |
| rs1582931  | G | 0.47 | 0.6  | -0.022 | 0.004 | 4.66E-07 | 0.53     | 0.017  | 0.004 | 0.511  |
| rs159032   | T | 0.23 | 0.13 | 0.004  | 0.006 | 0.542    | 0.18     | 0.005  | 0.005 | 0.303  |
| rs1601817  | C | 0.31 | 0.16 | -0.003 | 0.006 | 0.563    | 0.13     | 0.011  | 0.005 | 0.034  |
| rs1634350  | A | 0.44 | 0.7  | 0.016  | 0.005 | 0.000756 | 0.64     | -0.008 | 0.004 | 0.039  |
| rs1635853  | G | 0.41 | 0.33 | -0.01  | 0.004 | 0.0227   | 0.3      | -0.003 | 0.004 | 0.502  |
| rs1658820  | T | 0.24 | 0.38 | 0.014  | 0.004 | 0.00226  | 0.29     | -0.013 | 0.004 | 0.001  |
| rs16834431 | T | 0.21 | 0.01 | -0.019 | 0.03  | 0.518    | Low MAF* |        |       |        |
| rs16851483 | T | 0.07 | 0.24 | 0.025  | 0.005 | 4.90E-07 | 0.29     | -0.016 | 0.004 | <5E-08 |
| rs16882001 | G | 0.95 | 0.96 | -0.021 | 0.01  | 0.0317   | 0.98     | 0.006  | 0.011 | 0.606  |
| rs16906845 | G | 0.06 | 0.12 | -0.018 | 0.006 | 0.0043   | 0.15     | 0.016  | 0.005 | 0.002  |
| rs16907751 | C | 0.09 | 0.19 | -0.016 | 0.005 | 0.00238  | 0.14     | 0.028  | 0.005 | <5E-08 |
| rs16940823 | C | 0.17 | 0.09 | 0.001  | 0.007 | 0.845    | 0.09     | -0.001 | 0.006 | 0.836  |
| rs16978350 | G | 0.28 | 0.11 | 0.008  | 0.007 | 0.221    | 0.12     | 0.010  | 0.005 | 0.066  |
| rs16989232 | A | 0.39 | 0.52 | -0.001 | 0.004 | 0.823    | 0.42     | -0.002 | 0.004 | 0.509  |

|            |   |      |       |        |       |          |          |        |       |        |
|------------|---|------|-------|--------|-------|----------|----------|--------|-------|--------|
| rs17001561 | A | 0.15 | 0.02  | 0.003  | 0.014 | 0.82     | 0.01     | 0.008  | 0.018 | 0.644  |
| rs17014375 | G | 0.87 | 0.87  | -0.006 | 0.006 | 0.295    | 0.88     | 0.008  | 0.006 | 0.158  |
| rs17019336 | T | 0.23 | 0.35  | -0.01  | 0.004 | 0.0215   | 0.27     | 0.011  | 0.004 | 0.006  |
| rs1707322  | G | 0.32 | 0.3   | -0.014 | 0.005 | 0.0019   | 0.32     | 0.004  | 0.004 | 0.354  |
| rs17105272 | T | 0.32 | 0.47  | 0.011  | 0.004 | 0.0109   | 0.43     | -0.011 | 0.004 | 0.003  |
| rs17193211 | C | 0.07 | 0.07  | -0.018 | 0.008 | 0.0326   | 0.07     | 0.013  | 0.008 | 0.092  |
| rs17201143 | C | 0.31 | 0.48  | -0.004 | 0.004 | 0.411    | 0.44     | 0.013  | 0.004 | <5E-08 |
| rs1721447  | G | 0.51 | 0.22  | -0.001 | 0.005 | 0.848    | 0.32     | 0.002  | 0.004 | 0.553  |
| rs17276464 | T | 0.41 | 0.02  | -0.005 | 0.016 | 0.751    | Low MAF* |        |       |        |
| rs1730859  | G | 0.65 | 0.74  | -0.004 | 0.005 | 0.451    | 0.72     | 0.006  | 0.004 | 0.158  |
| rs17405819 | T | 0.68 | 0.55  | 0.023  | 0.004 | 6.40E-08 | 0.39     | -0.021 | 0.004 | <5E-08 |
| rs17425707 | C | 0.9  | 0.99  | -0.03  | 0.043 | 0.489    | Low MAF* |        |       |        |
| rs17448885 | C | 0.65 | 0.57  | 0.012  | 0.004 | 0.00672  | 0.62     | -0.006 | 0.004 | 0.096  |
| rs17522122 | T | 0.47 | 0.36  | 0.012  | 0.004 | 0.00555  | 0.35     | -0.010 | 0.004 | 0.014  |
| rs17535749 | A | 0.11 | 0.001 | 0.075  | 0.068 | 0.27     | Low MAF* |        |       |        |
| rs17551974 | C | 0.19 | 0.19  | -0.013 | 0.005 | 0.0141   | 0.19     | 0.008  | 0.005 | 0.069  |
| rs17574378 | T | 0.73 | 0.85  | 0.009  | 0.006 | 0.138    | 0.84     | -0.007 | 0.005 | 0.122  |
| rs17609108 | C | 0.85 | 0.85  | -0.011 | 0.006 | 0.0552   | 0.81     | -0.011 | 0.005 | 0.019  |
| rs17636031 | C | 0.72 | 0.98  | -0.018 | 0.019 | 0.35     | Low MAF* |        |       |        |
| rs17681451 | G | 0.08 | 0.01  | 0.032  | 0.029 | 0.262    | Low MAF* |        |       |        |
| rs17720922 | T | 0.19 | 0.08  | 0.001  | 0.008 | 0.857    | 0.11     | 0.002  | 0.006 | 0.773  |
| rs17757975 | T | 0.85 | 0.99  | 0.006  | 0.028 | 0.836    | Low MAF* |        |       |        |
| rs17806224 | G | 0.18 | 0.15  | -0.012 | 0.006 | 0.0479   | 0.14     | 0.011  | 0.005 | 0.033  |
| rs1819844  | A | 0.17 | 0.28  | 0.019  | 0.005 | 8.24E-05 | 0.19     | -0.013 | 0.005 | 0.006  |
| rs1852006  | G | 0.38 | 0.44  | -0.028 | 0.004 | 6.50E-11 | 0.43     | 0.014  | 0.004 | <5E-08 |
| rs1871329  | G | 0.76 | 0.71  | -0.008 | 0.005 | 0.106    | 0.68     | -0.006 | 0.004 | 0.136  |
| rs1876359  | T | 0.37 | 0.35  | 0      | 0.004 | 0.951    | 0.42     | -0.007 | 0.004 | 0.044  |
| rs1877875  | C | 0.43 | 0.3   | -0.009 | 0.005 | 0.0534   | 0.34     | 0.002  | 0.004 | 0.64   |
| rs1884389  | C | 0.44 | 0.8   | 0.015  | 0.005 | 0.00413  | 0.67     | 0.010  | 0.004 | 0.008  |

|           |   |      |        |        |       |          |          |        |       |        |
|-----------|---|------|--------|--------|-------|----------|----------|--------|-------|--------|
| rs1884429 | T | 0.23 | 0.07   | 0.019  | 0.008 | 0.0258   | 0.06     | -0.011 | 0.008 | 0.163  |
| rs1884897 | G | 0.37 | 0.14   | -0.021 | 0.006 | 0.000737 | 0.09     | 0.014  | 0.006 | 0.024  |
| rs1891215 | C | 0.54 | 0.66   | 0.004  | 0.004 | 0.426    | 0.53     | 0.003  | 0.004 | 0.491  |
| rs1899689 | T | 0.39 | 0.5    | 0.01   | 0.004 | 0.0141   | 0.41     | -0.010 | 0.004 | 0.005  |
| rs1911746 | T | 0.21 | 0.26   | -0.006 | 0.005 | 0.246    | 0.34     | -0.008 | 0.004 | 0.045  |
| rs1916801 | A | 0.62 | 0.43   | 0.003  | 0.004 | 0.491    | 0.31     | -0.011 | 0.004 | 0.009  |
| rs1927790 | C | 0.61 | 0.66   | -0.016 | 0.004 | 0.000294 | 0.58     | 0.010  | 0.004 | 0.005  |
| rs1928295 | T | 0.57 | 0.63   | 0.012  | 0.004 | 0.00771  | 0.56     | -0.015 | 0.004 | <5E-08 |
| rs1941697 | A | 0.45 | 0.8    | 0.002  | 0.005 | 0.765    | 0.76     | -0.013 | 0.004 | 0.001  |
| rs194809  | A | 0.19 | 0.27   | 0.004  | 0.005 | 0.406    | 0.19     | -0.012 | 0.005 | 0.009  |
| rs1951455 | C | 0.28 | 0.11   | -0.01  | 0.007 | 0.167    | 0.12     | 0.004  | 0.007 | 0.56   |
| rs1954494 | T | 0.56 | 0.48   | 0.007  | 0.004 | 0.129    | 0.49     | -0.003 | 0.004 | 0.343  |
| rs1967772 | G | 0.27 | 0.06   | -0.002 | 0.009 | 0.837    | 0.03     | 0.031  | 0.01  | 0.002  |
| rs1982350 | G | 0.64 | 0.62   | 0.004  | 0.005 | 0.354    | 0.67     | 0.007  | 0.004 | 0.065  |
| rs1982441 | T | 0.13 | 0.0001 | 0.069  | 0.042 | 0.0993   | Low MAF* |        |       |        |
| rs1987960 | C | 0.05 | 0.0001 | -0.304 | 0.155 | 0.0499   | Low MAF* |        |       |        |
| rs1990573 | G | 0.31 | 0.34   | 0.005  | 0.005 | 0.255    | 0.46     | 0.005  | 0.004 | 0.203  |
| rs1996120 | G | 0.59 | 0.65   | -0.03  | 0.004 | 2.38E-11 | 0.65     | 0.007  | 0.004 | 0.066  |
| rs2012502 | A | 0.38 | 0.18   | 0.013  | 0.006 | 0.0171   | 0.19     | -0.013 | 0.005 | 0.006  |
| rs2033529 | G | 0.73 | 0.81   | -0.006 | 0.005 | 0.266    | 0.7      | 0.011  | 0.004 | 0.006  |
| rs2044469 | G | 0.66 | 0.77   | -0.006 | 0.005 | 0.218    | 0.73     | 0.004  | 0.004 | 0.281  |
| rs2051559 | C | 0.86 | 0.85   | -0.003 | 0.006 | 0.554    | 0.8      | -0.001 | 0.004 | 0.831  |
| rs2053682 | A | 0.68 | 0.83   | 0.008  | 0.006 | 0.132    | 0.91     | -0.011 | 0.006 | 0.07   |
| rs2058527 | G | 0.27 | 0.28   | -0.014 | 0.005 | 0.00316  | 0.33     | 0.003  | 0.004 | 0.49   |
| rs2063177 | A | 0.35 | 0.11   | -0.003 | 0.007 | 0.64     | 0.12     | -0.001 | 0.005 | 0.873  |
| rs2065418 | T | 0.65 | 0.63   | 0.016  | 0.004 | 0.000425 | 0.64     | -0.012 | 0.004 | 0.001  |
| rs2070929 | C | 0.29 | 0.51   | 0.007  | 0.004 | 0.0876   | 0.55     | -0.002 | 0.004 | 0.607  |
| rs2072518 | A | 0.57 | 0.46   | 0.004  | 0.004 | 0.398    | 0.51     | 0.0001 | 0.004 | 0.911  |
| rs2072597 | G | 0.31 | 0.39   | -0.01  | 0.004 | 0.016    | 0.29     | 0.004  | 0.004 | 0.344  |



|           |   |      |        |        |       |          |          |        |       |        |
|-----------|---|------|--------|--------|-------|----------|----------|--------|-------|--------|
| rs2074881 | C | 0.19 | 0.28   | -0.014 | 0.005 | 0.00408  | 0.29     | 0.007  | 0.005 | 0.104  |
| rs2081493 | C | 0.3  | 0.19   | -0.003 | 0.005 | 0.531    | 0.26     | 0.003  | 0.004 | 0.438  |
| rs2105808 | C | 0.67 | 0.97   | -0.029 | 0.012 | 0.0147   | 0.95     | 0.006  | 0.008 | 0.434  |
| rs2107118 | A | 0.5  | 0.48   | 0.012  | 0.004 | 0.00443  | 0.57     | -0.011 | 0.004 | 0.004  |
| rs2112347 | T | 0.63 | 0.43   | 0.02   | 0.004 | 2.73E-06 | 0.44     | -0.024 | 0.004 | <5E-08 |
| rs2134858 | C | 0.51 | 0.42   | -0.005 | 0.004 | 0.26     | 0.47     | 0.010  | 0.004 | 0.004  |
| rs2155645 | C | 0.26 | 0.38   | -0.01  | 0.004 | 0.028    | 0.35     | 0.007  | 0.004 | 0.054  |
| rs215614  | G | 0.38 | 0.39   | 0.002  | 0.004 | 0.573    | 0.34     | 0.011  | 0.004 | 0.002  |
| rs2170382 | T | 0.11 | 0.0001 | 0.053  | 0.029 | 0.0674   | Low MAF* |        |       |        |
| rs217669  | C | 0.72 | 0.57   | -0.005 | 0.004 | 0.236    | 0.61     | 0.001  | 0.004 | 0.775  |
| rs2178899 | A | 0.88 | 0.98   | -0.012 | 0.014 | 0.402    | 0.99     | 0.009  | 0.017 | 0.587  |
| rs2183824 | T | 0.31 | 0.3    | 0.002  | 0.005 | 0.71     | 0.27     | 0.001  | 0.004 | 0.843  |
| rs2187449 | A | 0.77 | 0.93   | 0.001  | 0.008 | 0.862    | 0.93     | -0.008 | 0.007 | 0.266  |
| rs2192158 | A | 0.55 | 0.6    | -0.003 | 0.004 | 0.549    | 0.63     | -0.004 | 0.004 | 0.325  |
| rs2196618 | G | 0.26 | 0.38   | -0.007 | 0.004 | 0.0972   | 0.29     | 0.011  | 0.004 | 0.017  |
| rs2206277 | T | 0.16 | 0.23   | 0.037  | 0.005 | 1.60E-13 | 0.02     | -0.029 | 0.015 | 0.873  |
| rs2228213 | G | 0.34 | 0.23   | -0.017 | 0.005 | 0.000684 | 0.27     | 0.017  | 0.004 | <5E-08 |
| rs223058  | G | 0.33 | 0.04   | -0.009 | 0.011 | 0.424    | 0.02     | 0.002  | 0.014 | 0.916  |
| rs2237403 | C | 0.64 | 0.55   | -0.001 | 0.004 | 0.755    | 0.52     | 0.009  | 0.004 | 0.014  |
| rs2241743 | G | 0.43 | 0.36   | -0.003 | 0.004 | 0.532    | 0.35     | 0.005  | 0.004 | 0.188  |
| rs2246012 | C | 0.85 | 0.65   | -0.003 | 0.004 | 0.549    | 0.65     | 0.006  | 0.004 | 0.099  |
| rs2299383 | T | 0.4  | 0.45   | 0.016  | 0.004 | 0.000154 | 0.38     | -0.010 | 0.004 | 0.009  |
| rs2307022 | A | 0.33 | 0.14   | 0.013  | 0.006 | 0.0385   | 0.12     | -0.015 | 0.006 | 0.008  |
| rs2322622 | C | 0.35 | 0.14   | 0.007  | 0.006 | 0.228    | 0.08     | 0.008  | 0.005 | 0.09   |
| rs2342892 | T | 0.49 | 0.58   | 0.021  | 0.004 | 1.04E-06 | 0.63     | -0.015 | 0.004 | <5E-08 |
| rs2357760 | A | 0.67 | 0.76   | 0.014  | 0.005 | 0.00632  | 0.69     | -0.012 | 0.004 | 0.002  |
| rs2391540 | T | 0.67 | 0.79   | 0.008  | 0.005 | 0.148    | 0.83     | 0.006  | 0.005 | 0.22   |
| rs2396625 | T | 0.58 | 0.63   | -0.01  | 0.004 | 0.028    | 0.63     | -0.002 | 0.004 | 0.646  |
| rs2400414 | C | 0.35 | 0.25   | -0.018 | 0.005 | 0.000217 | 0.22     | 0.013  | 0.004 | 0.002  |

|           |   |      |      |        |       |          |          |        |       |        |
|-----------|---|------|------|--------|-------|----------|----------|--------|-------|--------|
| rs2425857 | A | 0.43 | 0.38 | 0.014  | 0.004 | 0.00138  | 0.36     | -0.005 | 0.004 | 0.174  |
| rs2434467 | T | 0.34 | 0.27 | 0.014  | 0.005 | 0.0047   | 0.35     | -0.013 | 0.004 | <5E-08 |
| rs2439823 | G | 0.45 | 0.74 | -0.004 | 0.005 | 0.46     | 0.71     | 0.003  | 0.004 | 0.438  |
| rs2447832 | T | 0.44 | 0.33 | 0.007  | 0.005 | 0.12     | 0.37     | -0.004 | 0.004 | 0.276  |
| rs2450448 | A | 0.69 | 0.93 | 0.003  | 0.008 | 0.668    | 0.92     | 0.0001 | 0.007 | 0.954  |
| rs2455793 | A | 0.42 | 0.63 | -0.005 | 0.004 | 0.291    | 0.61     | -0.005 | 0.004 | 0.199  |
| rs2470397 | C | 0.81 | 0.99 | -0.002 | 0.022 | 0.937    | Low MAF* |        |       |        |
| rs249293  | C | 0.7  | 0.43 | 0.003  | 0.004 | 0.525    | 0.5      | -0.003 | 0.004 | 0.42   |
| rs249612  | T | 0.71 | 0.46 | 0.009  | 0.004 | 0.0426   | 0.42     | -0.005 | 0.004 | 0.151  |
| rs2577947 | C | 0.82 | 0.88 | -0.006 | 0.006 | 0.357    | 0.89     | 0.013  | 0.006 | 0.027  |
| rs2596902 | G | 0.35 | 0.39 | -0.014 | 0.004 | 0.00146  | 0.41     | 0.005  | 0.004 | 0.15   |
| rs2601777 | G | 0.39 | 0.44 | -0.019 | 0.004 | 9.37E-06 | 0.47     | 0.009  | 0.004 | 0.011  |
| rs2605603 | G | 0.48 | 0.87 | -0.009 | 0.006 | 0.158    | 0.85     | 0.007  | 0.005 | 0.178  |
| rs2619976 | T | 0.4  | 0.27 | 0.004  | 0.005 | 0.412    | 0.23     | -0.004 | 0.004 | 0.341  |
| rs2622274 | G | 0.46 | 0.43 | -0.016 | 0.004 | 0.000269 | 0.41     | 0.012  | 0.004 | 0.001  |
| rs264962  | C | 0.54 | 0.35 | -0.01  | 0.004 | 0.0288   | 0.28     | -0.001 | 0.004 | 0.795  |
| rs2670854 | A | 0.72 | 0.83 | 0.012  | 0.006 | 0.0388   | 0.86     | -0.003 | 0.005 | 0.5    |
| rs2682406 | T | 0.59 | 0.64 | -0.013 | 0.004 | 0.00265  | 0.61     | 0.010  | 0.004 | 0.006  |
| rs2693686 | G | 0.61 | 0.74 | 0      | 0.005 | 0.999    | 0.8      | -0.005 | 0.004 | 0.275  |
| rs2715423 | G | 0.28 | 0.06 | 0      | 0.009 | 0.991    | 0.04     | -0.007 | 0.009 | 0.45   |
| rs273505  | C | 0.58 | 0.66 | -0.004 | 0.004 | 0.431    | 0.7      | 0.012  | 0.004 | 0.004  |
| rs2777768 | A | 0.72 | 0.96 | 0.004  | 0.01  | 0.677    | 0.98     | -0.019 | 0.012 | 0.12   |
| rs2803316 | G | 0.46 | 0.39 | -0.003 | 0.004 | 0.455    | 0.41     | 0.007  | 0.004 | 0.057  |
| rs2820295 | A | 0.33 | 0.12 | 0.006  | 0.007 | 0.394    | 0.1      | -0.021 | 0.006 | <5E-08 |
| rs2832283 | A | 0.23 | 0.05 | 0.003  | 0.01  | 0.772    | 0.04     | -0.012 | 0.01  | 0.07   |
| rs28350   | A | 0.17 | 0.08 | 0.017  | 0.008 | 0.0343   | 0.08     | -0.015 | 0.007 | 0.022  |
| rs2837398 | C | 0.61 | 0.47 | -0.011 | 0.004 | 0.00753  | 0.47     | -0.001 | 0.004 | 0.849  |
| rs284227  | C | 0.73 | 0.95 | -0.021 | 0.009 | 0.0274   | 0.95     | 0.005  | 0.008 | 0.548  |
| rs2861089 | A | 0.38 | 0.1  | 0.007  | 0.007 | 0.324    | 0.1      | -0.006 | 0.006 | 0.287  |

|            |   |      |      |        |       |          |      |        |       |        |
|------------|---|------|------|--------|-------|----------|------|--------|-------|--------|
| rs2861685  | T | 0.59 | 0.41 | 0.006  | 0.004 | 0.166    | 0.37 | -0.010 | 0.004 | 0.006  |
| rs2862996  | G | 0.7  | 0.84 | -0.003 | 0.006 | 0.6      | 0.86 | 0.003  | 0.005 | 0.597  |
| rs2870710  | C | 0.81 | 0.74 | 0.02   | 0.005 | 2.99E-05 | 0.68 | -0.013 | 0.004 | 0.001  |
| rs288230   | T | 0.84 | 0.84 | 0.006  | 0.006 | 0.304    | 0.85 | -0.003 | 0.005 | 0.597  |
| rs2899663  | G | 0.49 | 0.57 | 0.002  | 0.004 | 0.712    | 0.43 | 0.004  | 0.004 | 0.264  |
| rs2907948  | G | 0.24 | 0.05 | -0.006 | 0.01  | 0.571    | 0.04 | 0.009  | 0.009 | 0.336  |
| rs2933451  | C | 0.67 | 0.75 | -0.005 | 0.005 | 0.32     | 0.74 | 0.008  | 0.004 | 0.062  |
| rs2954021  | G | 0.51 | 0.43 | 0.005  | 0.004 | 0.238    | 0.45 | 0.002  | 0.004 | 0.564  |
| rs2968487  | T | 0.28 | 0.41 | 0.01   | 0.004 | 0.024    | 0.43 | -0.006 | 0.004 | 0.085  |
| rs29938    | C | 0.66 | 0.76 | -0.027 | 0.005 | 7.52E-08 | 0.79 | 0.014  | 0.004 | 0.001  |
| rs3101336  | C | 0.38 | 0.08 | -0.022 | 0.008 | 0.00379  | 0.07 | 0.025  | 0.007 | <5E-08 |
| rs3134358  | T | 0.62 | 0.64 | 0.006  | 0.004 | 0.202    | 0.56 | -0.003 | 0.004 | 0.366  |
| rs325220   | G | 0.3  | 0.06 | -0.007 | 0.009 | 0.476    | 0.11 | 0.014  | 0.006 | 0.016  |
| rs326845   | G | 0.38 | 0.48 | -0.001 | 0.004 | 0.872    | 0.5  | -0.003 | 0.004 | 0.38   |
| rs329124   | A | 0.59 | 0.6  | 0.018  | 0.004 | 3.21E-05 | 0.63 | -0.019 | 0.004 | <5E-08 |
| rs340025   | C | 0.41 | 0.27 | -0.01  | 0.005 | 0.0466   | 0.17 | 0.004  | 0.005 | 0.38   |
| rs34277166 | A | 0.44 | 0.11 | 0.011  | 0.007 | 0.117    | 0.08 | -0.015 | 0.006 | 0.017  |
| rs34720381 | T | 0.09 | 0.08 | 0.006  | 0.008 | 0.433    | 0.07 | -0.008 | 0.007 | 0.265  |
| rs34801745 | C | 0.36 | 0.84 | 0.002  | 0.006 | 0.776    | 0.84 | 0.001  | 0.005 | 0.836  |
| rs349088   | C | 0.48 | 0.34 | -0.001 | 0.005 | 0.767    | 0.44 | 0.004  | 0.004 | 0.257  |
| rs354508   | C | 0.16 | 0.21 | -0.008 | 0.005 | 0.113    | 0.2  | 0.003  | 0.004 | 0.488  |
| rs355777   | C | 0.4  | 0.43 | 0.007  | 0.004 | 0.11     | 0.53 | -0.009 | 0.004 | 0.008  |
| rs355914   | C | 0.63 | 0.52 | 0.001  | 0.004 | 0.868    | 0.47 | -0.007 | 0.004 | 0.05   |
| rs35809007 | G | 0.36 | 0.48 | -0.001 | 0.004 | 0.877    | 0.55 | -0.002 | 0.004 | 0.566  |
| rs35851183 | G | 0.64 | 0.57 | -0.005 | 0.004 | 0.203    | 0.52 | 0.013  | 0.004 | <5E-08 |
| rs36061954 | T | 0.4  | 0.33 | 0.019  | 0.005 | 2.45E-05 | 0.3  | 0.0001 | 0.004 | 0.989  |
| rs3738476  | C | 0.88 | 0.63 | -0.004 | 0.005 | 0.38     | 0.91 | 0.004  | 0.006 | 0.519  |
| rs3739514  | A | 0.34 | 0.55 | 0.009  | 0.004 | 0.0353   | 0.55 | -0.004 | 0.004 | 0.315  |
| rs3744017  | A | 0.19 | 0.14 | 0.003  | 0.006 | 0.646    | 0.15 | -0.001 | 0.005 | 0.864  |

|            |   |      |        |        |       |          |          |        |       |        |
|------------|---|------|--------|--------|-------|----------|----------|--------|-------|--------|
| rs3746038  | C | 0.22 | 0.41   | -0.007 | 0.004 | 0.0997   | 0.5      | 0.008  | 0.004 | 0.043  |
| rs3750944  | G | 0.56 | 0.5    | -0.009 | 0.004 | 0.0287   | 0.63     | 0.004  | 0.004 | 0.291  |
| rs3752904  | C | 0.51 | 0.46   | -0.003 | 0.004 | 0.464    | 0.48     | 0.0001 | 0.004 | 0.995  |
| rs3766160  | G | 0.77 | 0.53   | -0.011 | 0.004 | 0.00805  | 0.52     | 0.003  | 0.004 | 0.438  |
| rs3770799  | G | 0.64 | 0.78   | -0.008 | 0.005 | 0.111    | 0.81     | 0.008  | 0.004 | 0.068  |
| rs3774573  | T | 0.74 | 0.84   | 0.012  | 0.006 | 0.0413   | 0.81     | -0.011 | 0.005 | 0.014  |
| rs3806114  | G | 0.69 | 0.8    | -0.004 | 0.006 | 0.493    | 0.76     | 0.003  | 0.004 | 0.45   |
| rs3808477  | C | 0.27 | 0.3    | -0.019 | 0.005 | 4.32E-05 | 0.27     | 0.015  | 0.004 | <5E-08 |
| rs3811125  | C | 0.28 | 0.24   | -0.008 | 0.005 | 0.127    | 0.27     | 0.010  | 0.004 | 0.024  |
| rs3822683  | A | 0.79 | 0.58   | 0      | 0.004 | 0.984    | 0.76     | 0.002  | 0.004 | 0.254  |
| rs3825061  | T | 0.39 | 0.17   | 0.009  | 0.006 | 0.127    | 0.12     | -0.010 | 0.006 | 0.07   |
| rs3914628  | T | 0.86 | 0.9    | 0.003  | 0.007 | 0.696    | 0.1      | -0.007 | 0.005 | 0.218  |
| rs3922980  | G | 0.5  | 0.84   | 0.001  | 0.006 | 0.875    | Low MAF* |        |       |        |
| rs3923783  | C | 0.18 | 0.13   | -0.005 | 0.006 | 0.405    | 0.11     | 0.008  | 0.006 | 0.172  |
| rs3930349  | C | 0.21 | 0.29   | -0.011 | 0.005 | 0.0235   | 0.36     | 0.006  | 0.004 | 0.113  |
| rs3935190  | G | 0.54 | 0.69   | -0.016 | 0.005 | 0.000684 | 0.6      | 0.015  | 0.004 | <5E-08 |
| rs39654    | G | 0.45 | 0.4    | -0.009 | 0.004 | 0.0363   | 0.41     | 0.009  | 0.004 | 0.015  |
| rs4097319  | T | 0.56 | 0.42   | 0.001  | 0.004 | 0.798    | 0.41     | -0.002 | 0.004 | 0.652  |
| rs4123853  | T | 0.37 | 0.25   | 0.003  | 0.005 | 0.55     | 0.18     | -0.011 | 0.005 | 0.018  |
| rs41290587 | T | 0.01 | 0.0001 | 0.085  | 0.192 | 0.659    | Low MAF* |        |       |        |
| rs4239020  | T | 0.68 | 0.93   | -0.005 | 0.008 | 0.588    | 0.95     | 0.010  | 0.008 | 0.251  |
| rs4242244  | T | 0.58 | 0.37   | 0.014  | 0.004 | 0.00218  | 0.28     | -0.007 | 0.004 | 0.092  |
| rs4256980  | G | 0.67 | 0.62   | -0.022 | 0.004 | 2.91E-07 | 0.62     | 0.019  | 0.004 | <5E-08 |
| rs4270551  | A | 0.13 | 0.003  | 0.086  | 0.05  | 0.0864   | Low MAF* |        |       |        |
| rs4273371  | C | 0.51 | 0.82   | -0.01  | 0.005 | 0.0573   | 0.79     | 0.001  | 0.004 | 0.787  |
| rs427943   | C | 0.43 | 0.49   | -0.014 | 0.004 | 0.00113  | 0.56     | 0.010  | 0.004 | 0.008  |
| rs4290163  | T | 0.4  | 0.58   | 0.015  | 0.004 | 0.000442 | 0.46     | -0.017 | 0.004 | <5E-08 |
| rs4307239  | G | 0.46 | 0.3    | -0.003 | 0.005 | 0.544    | 0.19     | 0.005  | 0.005 | 0.231  |
| rs4372836  | T | 0.33 | 0.27   | 0.013  | 0.005 | 0.0085   | 0.32     | -0.007 | 0.004 | 0.065  |

|           |   |      |      |        |       |          |      |        |         |        |
|-----------|---|------|------|--------|-------|----------|------|--------|---------|--------|
| rs4382152 | T | 0.62 | 0.2  | 0.01   | 0.005 | 0.068    | 0.19 | -0.010 | 0.004   | 0.011  |
| rs4414033 | A | 0.6  | 0.69 | 0.006  | 0.005 | 0.19     | 0.69 | -0.014 | 0.004   | <5E-08 |
| rs4421883 | C | 0.49 | 0.67 | 0.002  | 0.005 | 0.733    | 0.74 | 0.002  | 0.004   | 0.683  |
| rs4581940 | T | 0.59 | 0.75 | 0.02   | 0.005 | 3.22E-05 | 0.75 | -0.002 | 0.004   | 0.632  |
| rs459552  | T | 0.77 | 0.91 | -0.001 | 0.007 | 0.895    | 0.9  | 0.0001 | 0.006   | 0.969  |
| rs4609871 | T | 0.54 | 0.4  | 0.014  | 0.004 | 0.00112  | 0.31 | -0.012 | 0.004   | 0.001  |
| rs4671328 | T | 0.45 | 0.38 | 0.02   | 0.004 | 4.96E-06 | 0.41 | -0.020 | 0.004   | <5E-08 |
| rs4700608 | C | 0.48 | 0.15 | -0.015 | 0.006 | 0.0147   | 0.15 | 0.004  | 0.005   | 0.41   |
| rs4703019 | A | 0.39 | 0.4  | -0.001 | 0.004 | 0.738    | 0.35 | -0.007 | 0.004   | 0.044  |
| rs4721089 | T | 0.78 | 0.89 | 0.008  | 0.007 | 0.231    | 0.88 | 0.005  | 0.006   | 0.399  |
| rs4721823 | G | 0.14 | 0.44 | -0.012 | 0.004 | 0.00404  | 0.51 | 0.004  | 0.004   | 0.241  |
| rs4722398 | T | 0.15 | 0.02 | 0.012  | 0.014 | 0.418    | 0.06 | -0.006 | 0.007   | 0.408  |
| rs4739570 | A | 0.62 | 0.59 | 0.01   | 0.004 | 0.021    | 0.54 | -0.013 | 0.004   | <5E-08 |
| rs4740619 | T | 0.54 | 0.24 | 0.015  | 0.005 | 0.00199  | 0.23 | -0.012 | 0.004   | 0.005  |
| rs4746339 | T | 0.26 | 0.03 | 0.01   | 0.012 | 0.417    | 0.04 | -0.026 | 0.009   | 0.004  |
| rs4794977 | C | 0.57 | 0.76 | -0.002 | 0.005 | 0.709    | 0.74 | -0.002 | 0.004   | 0.682  |
| rs4795195 | A | 0.29 | 0.41 | 0      | 0.004 | 0.983    | 0.37 | -0.004 | 0.004   | 0.259  |
| rs4802570 | C | 0.4  | 0.75 | -0.001 | 0.005 | 0.88     | 0.75 | -0.009 | 0.004   | 0.029  |
| rs4814512 | A | 0.81 | 0.8  | 0.012  | 0.005 | 0.0278   | 0.71 | -0.006 | 0.004   | 0.117  |
| rs4818226 | G | 0.31 | 0.09 | 0.011  | 0.008 | 0.144    | 0.08 | -0.004 | 0.007   | 0.522  |
| rs4834272 | C | 0.69 | 0.46 | -0.01  | 0.004 | 0.0236   | 0.53 | 0.014  | 0.004   | <5E-08 |
| rs4841504 | C | 0.5  | 0.04 | -0.014 | 0.011 | 0.221    | 0.03 | -0.014 | 0.011   | 0.223  |
| rs4851057 | T | 0.13 | 0.03 | 0.011  | 0.013 | 0.389    | 0.02 | 0.002  | 0.014   | 0.877  |
| rs4857968 | G | 0.29 | 0.04 | -0.018 | 0.012 | 0.118    | 0.03 | 0.008  | 0.011   | 0.473  |
| rs487152  | A | 0.5  | 0.33 | 0.012  | 0.005 | 0.0072   | 0.29 | -0.020 | 0.004   | <5E-08 |
| rs4880341 | C | 0.57 | 0.94 | -0.01  | 0.008 | 0.234    | 0.92 | 0.0001 | 0.01    | 0.39   |
| rs4895231 | C | 0.47 | 0.2  | -0.005 | 0.006 | 0.398    | 0.13 | 0.0001 | 0.00555 | 0.4097 |
| rs4906263 | G | 0.66 | 0.58 | -0.028 | 0.004 | 4.90E-11 | 0.54 | 0.011  | 0.004   | 0.003  |
| rs4973618 | G | 0.66 | 0.5  | -0.004 | 0.004 | 0.404    | 0.49 | 0.009  | 0.004   | 0.014  |

|            |   |      |       |        |       |          |          |        |       |        |
|------------|---|------|-------|--------|-------|----------|----------|--------|-------|--------|
| rs4985155  | A | 0.67 | 0.55  | 0.01   | 0.004 | 0.0151   | 0.55     | -0.016 | 0.004 | <5E-08 |
| rs5017416  | T | 0.05 | 0.01  | 0.028  | 0.029 | 0.324    | Low MAF* |        |       |        |
| rs507856   | T | 0.56 | 0.44  | 0.01   | 0.004 | 0.0235   | 0.36     | -0.008 | 0.004 | 0.041  |
| rs5215     | T | 0.63 | 0.62  | 0.013  | 0.004 | 0.00301  | 0.63     | -0.018 | 0.004 | <5E-08 |
| rs539100   | A | 0.22 | 0.02  | 0.013  | 0.015 | 0.379    | 0.04     | -0.001 | 0.01  | 0.893  |
| rs543874   | G | 0.78 | 0.82  | -0.056 | 0.005 | 3.01E-25 | 0.78     | 0.047  | 0.004 | <5E-08 |
| rs544722   | T | 0.45 | 0.76  | 0.004  | 0.005 | 0.395    | 0.79     | -0.002 | 0.004 | 0.604  |
| rs55676934 | G | 0.67 | 0.81  | -0.005 | 0.005 | 0.349    | 0.81     | 0.004  | 0.005 | 0.416  |
| rs559267   | G | 0.67 | 0.58  | -0.015 | 0.004 | 0.000416 | 0.56     | 0.018  | 0.004 | <5E-08 |
| rs55966114 | T | 0.19 | 0.16  | 0.01   | 0.006 | 0.0938   | 0.14     | -0.013 | 0.005 | 0.014  |
| rs561136   | C | 0.87 | 0.92  | -0.021 | 0.008 | 0.00826  | 0.81     | 0.009  | 0.004 | 0.041  |
| rs56356382 | T | 0.81 | 0.99  | 0.033  | 0.037 | 0.372    | Low MAF* |        |       |        |
| rs57800857 | A | 0.63 | 0.73  | -0.014 | 0.005 | 0.0036   | 0.76     | -0.011 | 0.004 | 0.009  |
| rs58139454 | G | 0.22 | 0.19  | -0.007 | 0.005 | 0.18     | 0.22     | 0.010  | 0.004 | 0.026  |
| rs592483   | C | 0.41 | 0.21  | -0.02  | 0.005 | 0.000221 | 0.19     | 0.004  | 0.005 | 0.386  |
| rs59302296 | A | 0.1  | 0.002 | 0.06   | 0.054 | 0.271    | Low MAF* |        |       |        |
| rs594821   | C | 0.09 | 0.06  | -0.031 | 0.009 | 0.000535 | 0.12     | 0.010  | 0.006 | 0.075  |
| rs6019483  | T | 0.17 | 0.08  | -0.015 | 0.008 | 0.0632   | 0.12     | 0.004  | 0.006 | 0.44   |
| rs6023633  | G | 0.78 | 0.99  | 0.002  | 0.04  | 0.956    | Low MAF* |        |       |        |
| rs6092179  | C | 0.2  | 0.15  | -0.027 | 0.006 | 5.23E-06 | 0.12     | 0.020  | 0.005 | <5E-08 |
| rs61051952 | A | 0.75 | 0.62  | 0      | 0.004 | 0.939    | 0.67     | -0.003 | 0.004 | 0.383  |
| rs6130360  | A | 0.85 | 0.75  | 0.014  | 0.005 | 0.00417  | 0.8      | -0.017 | 0.005 | <5E-08 |
| rs6142067  | T | 0.6  | 0.75  | 0.014  | 0.005 | 0.00411  | 0.65     | -0.009 | 0.004 | 0.019  |
| rs615568   | G | 0.52 | 0.9   | 0.012  | 0.007 | 0.0765   | 0.9      | 0.005  | 0.006 | 0.385  |
| rs61740466 | G | 0.77 | 0.51  | -0.02  | 0.004 | 3.26E-06 | 0.65     | 0.007  | 0.004 | 0.079  |
| rs61813324 | T | 0.13 | 0.003 | 0.021  | 0.051 | 0.68     | Low MAF* |        |       |        |
| rs61828641 | A | 0.11 | 0.26  | 0.023  | 0.005 | 1.44E-06 | 0.21     | -0.021 | 0.004 | <5E-08 |
| rs61903695 | G | 0.75 | 0.9   | -0.008 | 0.007 | 0.247    | 0.89     | 0.013  | 0.006 | 0.017  |
| rs62118504 | G | 0.61 | 0.98  | -0.005 | 0.015 | 0.723    | 0.99     | -0.010 | 0.028 | 0.731  |

|           |   |      |      |        |       |          |          |        |       |        |
|-----------|---|------|------|--------|-------|----------|----------|--------|-------|--------|
| rs6265    | C | 0.18 | 0.49 | -0.036 | 0.004 | 1.75E-17 | 0.41     | 0.038  | 0.004 | <5E-08 |
| rs630602  | C | 0.61 | 0.33 | 0.002  | 0.005 | 0.628    | 0.38     | 0.001  | 0.004 | 0.804  |
| rs6419734 | T | 0.14 | 0.01 | -0.008 | 0.023 | 0.745    | Low MAF* |        |       |        |
| rs6435622 | C | 0.32 | 0.33 | 0.015  | 0.005 | 0.00138  | 0.48     | -0.013 | 0.004 | <5E-08 |
| rs6443750 | C | 0.2  | 0.01 | -0.039 | 0.048 | 0.416    | Low MAF* |        |       |        |
| rs6451675 | G | 0.32 | 0.18 | -0.019 | 0.006 | 0.000672 | 0.19     | 0.004  | 0.004 | 0.312  |
| rs6463489 | T | 0.1  | 0.08 | 0.004  | 0.008 | 0.619    | 0.04     | -0.003 | 0.009 | 0.74   |
| rs6476617 | G | 0.38 | 0.2  | -0.01  | 0.005 | 0.0642   | 0.26     | 0.011  | 0.004 | 0.006  |
| rs6477694 | C | 0.36 | 0.43 | -0.014 | 0.004 | 0.00148  | 0.39     | 0.016  | 0.004 | <5E-08 |
| rs6493498 | T | 0.45 | 0.48 | 0.007  | 0.004 | 0.0947   | 0.59     | 0.002  | 0.004 | 0.586  |
| rs6500208 | A | 0.2  | 0.42 | 0.002  | 0.004 | 0.689    | 0.39     | -0.010 | 0.004 | 0.005  |
| rs650198  | C | 0.73 | 0.76 | 0.008  | 0.005 | 0.107    | 0.72     | 0.003  | 0.004 | 0.464  |
| rs6511027 | C | 0.17 | 0.02 | -0.027 | 0.015 | 0.0708   | 0.01     | -0.004 | 0.016 | 0.813  |
| rs6512302 | C | 0.74 | 0.72 | 0.005  | 0.005 | 0.304    | 0.73     | -0.003 | 0.004 | 0.438  |
| rs651548  | A | 0.36 | 0.38 | 0.008  | 0.004 | 0.0651   | 0.41     | 0.006  | 0.004 | 0.121  |
| rs6539064 | C | 0.75 | 0.66 | 0.005  | 0.005 | 0.3      | 0.64     | -0.009 | 0.004 | 0.02   |
| rs6540498 | T | 0.62 | 0.55 | -0.002 | 0.004 | 0.61     | 0.42     | 0.003  | 0.004 | 0.473  |
| rs6545714 | G | 0.61 | 0.64 | 0.008  | 0.004 | 0.0603   | 0.7      | 0.009  | 0.004 | 0.018  |
| rs6556301 | G | 0.63 | 0.55 | -0.011 | 0.004 | 0.00766  | 0.57     | 0.007  | 0.004 | 0.066  |
| rs6561766 | A | 0.13 | 0.11 | 0      | 0.007 | 0.949    | 0.12     | -0.012 | 0.005 | 0.028  |
| rs6567160 | C | 0.75 | 0.8  | -0.06  | 0.005 | 3.45E-30 | 0.78     | 0.051  | 0.004 | <5E-08 |
| rs6574100 | A | 0.59 | 0.9  | 0.011  | 0.007 | 0.123    | 0.9      | -0.006 | 0.006 | 0.314  |
| rs6577584 | G | 0.66 | 0.82 | -0.009 | 0.005 | 0.11     | 0.82     | 0.014  | 0.005 | 0.002  |
| rs6591407 | C | 0.2  | 0.1  | -0.006 | 0.007 | 0.421    | 0.15     | 0.008  | 0.005 | 0.09   |
| rs6602411 | T | 0.18 | 0.02 | 0.014  | 0.014 | 0.334    | 0.01     | 0.008  | 0.016 | 0.634  |
| rs6604015 | C | 0.91 | 0.97 | -0.016 | 0.011 | 0.155    | 0.98     | 0.019  | 0.014 | 0.163  |
| rs6606686 | G | 0.7  | 0.99 | -0.031 | 0.025 | 0.204    | 0.98     | 0.009  | 0.013 | 0.691  |
| rs6607337 | C | 0.3  | 0.25 | -0.01  | 0.005 | 0.0521   | 0.75     | 0.004  | 0.004 | 0.359  |
| rs6661316 | T | 0.59 | 0.44 | 0.013  | 0.004 | 0.00322  | 0.42     | -0.013 | 0.004 | <5E-08 |

|           |   |      |      |        |       |          |          |        |       |        |
|-----------|---|------|------|--------|-------|----------|----------|--------|-------|--------|
| rs6690398 | A | 0.55 | 0.51 | 0.012  | 0.004 | 0.00364  | 0.44     | -0.009 | 0.004 | 0.017  |
| rs6696828 | C | 0.3  | 0.28 | 0.008  | 0.005 | 0.079    | 0.25     | -0.004 | 0.004 | 0.341  |
| rs6710871 | A | 0.14 | 0.1  | 0.025  | 0.007 | 0.000328 | 0.14     | -0.011 | 0.005 | 0.034  |
| rs6720868 | T | 0.31 | 0.23 | 0      | 0.005 | 0.925    | 0.23     | -0.007 | 0.004 | 0.1    |
| rs6733834 | C | 0.81 | 0.71 | 0.019  | 0.005 | 5.98E-05 | 0.78     | -0.018 | 0.004 | <5E-08 |
| rs6781254 | T | 0.3  | 0.34 | 0.006  | 0.004 | 0.201    | 0.32     | -0.006 | 0.004 | 0.15   |
| rs6804181 | A | 0.82 | 0.84 | 0.02   | 0.006 | 0.000617 | 0.76     | -0.016 | 0.004 | <5E-08 |
| rs6804842 | G | 0.43 | 0.37 | -0.008 | 0.005 | 0.0782   | 0.38     | 0.013  | 0.004 | 0.001  |
| rs6804915 | A | 0.29 | 0.25 | 0.02   | 0.005 | 4.50E-05 | 0.23     | -0.011 | 0.004 | 0.012  |
| rs6809307 | T | 0.26 | 0.36 | 0.011  | 0.004 | 0.0124   | 0.39     | -0.013 | 0.004 | <5E-08 |
| rs6818414 | C | 0.52 | 0.69 | -0.003 | 0.005 | 0.469    | 0.72     | 0.011  | 0.004 | 0.007  |
| rs6832762 | G | 0.51 | 0.08 | 0.003  | 0.008 | 0.689    | 0.05     | 0.002  | 0.008 | 0.82   |
| rs6850421 | A | 0.46 | 0.54 | 0.003  | 0.004 | 0.442    | 0.44     | 0.0001 | 0.004 | 0.99   |
| rs6857    | C | 0.17 | 0.1  | -0.004 | 0.007 | 0.616    | 0.17     | 0.014  | 0.005 | 0.004  |
| rs6864049 | G | 0.49 | 0.3  | -0.005 | 0.005 | 0.25     | 0.31     | 0.015  | 0.004 | <5E-08 |
| rs6890310 | G | 0.29 | 0.09 | -0.01  | 0.008 | 0.211    | 0.08     | 0.0001 | 0.006 | 0.993  |
| rs6905288 | G | 0.57 | 0.73 | -0.012 | 0.005 | 0.0144   | 0.79     | -0.005 | 0.005 | 0.244  |
| rs6916553 | G | 0.24 | 0.02 | -0.015 | 0.016 | 0.341    | 0.03     | 0.028  | 0.011 | 0.013  |
| rs6922607 | G | 0.81 | 0.92 | 0.001  | 0.007 | 0.886    | 0.89     | 0.0001 | 0.006 | 0.979  |
| rs6931385 | A | 0.48 | 0.4  | -0.001 | 0.004 | 0.904    | 0.48     | -0.008 | 0.004 | 0.028  |
| rs6932930 | G | 0.79 | 0.65 | -0.006 | 0.004 | 0.171    | 0.25     | 0.004  | 0.004 | 0.33   |
| rs6934973 | G | 0.7  | 0.58 | -0.006 | 0.004 | 0.138    | 0.68     | 0.003  | 0.004 | 0.356  |
| rs6954694 | G | 0.84 | 0.63 | -0.007 | 0.005 | 0.108    | Low MAF* |        |       |        |
| rs6962280 | G | 0.44 | 0.19 | -0.009 | 0.005 | 0.0996   | 0.19     | 0.013  | 0.005 | 0.011  |
| rs6968554 | G | 0.61 | 0.58 | -0.005 | 0.004 | 0.248    | 0.66     | 0.004  | 0.004 | 0.236  |
| rs6970595 | C | 0.58 | 0.8  | 0.002  | 0.005 | 0.638    | 0.77     | 0.005  | 0.004 | 0.279  |
| rs698147  | A | 0.45 | 0.45 | 0.005  | 0.004 | 0.244    | 0.51     | -0.002 | 0.004 | 0.551  |
| rs7024334 | T | 0.23 | 0.57 | 0.009  | 0.004 | 0.0362   | 0.58     | -0.014 | 0.004 | <5E-08 |
| rs7031064 | A | 0.53 | 0.59 | 0.004  | 0.004 | 0.3      | 0.42     | 0.0001 | 0.004 | 0.927  |



|            |   |      |       |        |       |          |          |        |       |        |
|------------|---|------|-------|--------|-------|----------|----------|--------|-------|--------|
| rs7037266  | C | 0.36 | 0.69  | -0.003 | 0.005 | 0.483    | 0.63     | 0.008  | 0.004 | 0.035  |
| rs704061   | C | 0.55 | 0.62  | -0.006 | 0.004 | 0.159    | 0.95     | 0.005  | 0.009 | 0.059  |
| rs7070670  | C | 0.32 | 0.18  | -0.001 | 0.006 | 0.878    | 0.13     | 0.0001 | 0.006 | 0.97   |
| rs7084454  | A | 0.31 | 0.01  | 0.018  | 0.018 | 0.322    | Low MAF* |        |       |        |
| rs709400   | A | 0.62 | 0.93  | -0.006 | 0.008 | 0.486    | 0.87     | -0.010 | 0.005 | 0.054  |
| rs7123876  | C | 0.75 | 0.84  | -0.007 | 0.006 | 0.24     | 0.76     | 0.015  | 0.004 | <5E-08 |
| rs7124681  | A | 0.42 | 0.31  | 0.021  | 0.005 | 4.48E-06 | 0.31     | -0.022 | 0.004 | <5E-08 |
| rs7133378  | A | 0.33 | 0.13  | 0.011  | 0.006 | 0.0826   | 0.16     | -0.008 | 0.005 | 0.117  |
| rs7134628  | A | 0.1  | 0.01  | -0.008 | 0.032 | 0.814    | Low MAF* |        |       |        |
| rs713763   | A | 0.42 | 0.19  | -0.001 | 0.005 | 0.91     | 0.19     | -0.004 | 0.005 | 0.459  |
| rs7138803  | A | 0.39 | 0.28  | 0.023  | 0.005 | 1.63E-06 | 0.35     | -0.010 | 0.004 | 0.007  |
| rs7141307  | C | 0.74 | 0.86  | -0.016 | 0.006 | 0.00996  | 0.79     | 0.008  | 0.005 | 0.083  |
| rs7144011  | T | 0.23 | 0.002 | -0.028 | 0.044 | 0.525    | Low MAF* |        |       |        |
| rs715      | C | 0.7  | 0.82  | -0.011 | 0.005 | 0.0504   | 0.84     | 0.014  | 0.005 | 0.005  |
| rs7181610  | A | 0.86 | 0.99  | -0.028 | 0.062 | 0.656    | 0.84     | -0.002 | 0.005 | 0.607  |
| rs7186893  | G | 0.26 | 0.1   | 0      | 0.007 | 0.997    | 0.08     | 0.014  | 0.006 | 0.03   |
| rs7189122  | C | 0.83 | 0.66  | -0.005 | 0.004 | 0.258    | 0.66     | 0.009  | 0.004 | 0.012  |
| rs719802   | T | 0.4  | 0.48  | 0.001  | 0.004 | 0.82     | 0.56     | -0.007 | 0.004 | 0.052  |
| rs7206608  | G | 0.68 | 0.94  | -0.015 | 0.009 | 0.0776   | 0.94     | 0.001  | 0.008 | 0.88   |
| rs7217226  | G | 0.66 | 0.74  | -0.016 | 0.005 | 0.000727 | 0.77     | 0.020  | 0.004 | <5E-08 |
| rs7219230  | T | 0.34 | 0.74  | 0.015  | 0.005 | 0.00134  | 0.85     | -0.005 | 0.005 | 0.56   |
| rs7238896  | G | 0.86 | 0.99  | -0.036 | 0.044 | 0.418    | Low MAF* |        |       |        |
| rs7239114  | A | 0.54 | 0.12  | 0.017  | 0.007 | 0.0104   | 0.11     | -0.014 | 0.006 | 0.01   |
| rs7243357  | T | 0.83 | 0.8   | 0.029  | 0.005 | 4.75E-08 | 0.77     | -0.015 | 0.005 | 0.005  |
| rs7259325  | G | 0.48 | 0.7   | -0.004 | 0.005 | 0.402    | 0.7      | -0.003 | 0.004 | 0.515  |
| rs72673947 | G | 0.89 | 0.92  | -0.006 | 0.008 | 0.437    | 0.9      | 0.004  | 0.006 | 0.486  |
| rs730180   | A | 0.79 | 0.46  | 0.006  | 0.004 | 0.163    | 0.49     | -0.005 | 0.004 | 0.145  |
| rs7318817  | C | 0.63 | 0.83  | -0.018 | 0.006 | 0.00129  | 0.86     | 0.012  | 0.005 | 0.014  |
| rs73213501 | A | 0.83 | 0.83  | -0.002 | 0.006 | 0.659    | 0.9      | -0.004 | 0.006 | 0.541  |

|            |   |      |  |      |        |       |          |          |        |         |         |
|------------|---|------|--|------|--------|-------|----------|----------|--------|---------|---------|
| rs73249175 | G | 0.88 |  | 0.99 | 0.006  | 0.066 | 0.93     | Low MAF* |        |         |         |
| rs7357754  | G | 0.5  |  | 0.72 | 0.001  | 0.005 | 0.864    | 0.65     | 0.005  | 0.004   | 0.175   |
| rs740157   | A | 0.45 |  | 0.37 | 0.01   | 0.004 | 0.0185   | 0.37     | -0.010 | 0.004   | 0.005   |
| rs7498044  | G | 0.21 |  | 0.01 | -0.016 | 0.025 | 0.513    | Low MAF* |        |         |         |
| rs7498665  | G | 0.62 |  | 0.88 | -0.017 | 0.006 | 0.00793  | 0.86     | 0.030  | 0.005   | <5E-08  |
| rs7523668  | G | 0.44 |  | 0.72 | 0      | 0.005 | 0.981    | 0.65     | 0.005  | 0.004   | 0.17    |
| rs7534091  | G | 0.72 |  | 0.66 | -0.017 | 0.004 | 0.000104 | 0.51     | 0.015  | 0.004   | <5E-08  |
| rs7537581  | A | 0.53 |  | 0.53 | 0.013  | 0.004 | 0.00324  | 0.48     | 0.0001 | 0.00411 | 0.03179 |
| rs7561278  | T | 0.77 |  | 0.67 | 0.016  | 0.005 | 0.000322 | 0.56     | -0.016 | 0.004   | <5E-08  |
| rs7570446  | A | 0.54 |  | 0.59 | 0      | 0.004 | 0.962    | 0.43     | 0.000  | 0.004   | 0.988   |
| rs7575118  | T | 0.16 |  | 0.02 | 0.002  | 0.021 | 0.916    | 0.02     | -0.024 | 0.012   | 0.051   |
| rs7588437  | G | 0.37 |  | 0.25 | -0.016 | 0.005 | 0.000979 | 0.22     | 0.018  | 0.004   | <5E-08  |
| rs7589023  | T | 0.84 |  | 0.96 | 0.017  | 0.011 | 0.106    | 0.96     | 0.003  | 0.009   | 0.753   |
| rs7599312  | G | 0.27 |  | 0.03 | -0.018 | 0.012 | 0.134    | 0.04     | 0.015  | 0.01    | 0.111   |
| rs7601895  | C | 0.69 |  | 0.94 | 0.014  | 0.009 | 0.11     | 0.91     | 0.003  | 0.006   | 0.675   |
| rs761423   | T | 0.54 |  | 0.73 | 0.006  | 0.005 | 0.221    | 0.71     | -0.011 | 0.004   | 0.005   |
| rs7616009  | G | 0.16 |  | 0.42 | 0.004  | 0.004 | 0.336    | 0.5      | 0.012  | 0.004   | 0.001   |
| rs7621025  | C | 0.26 |  | 0.13 | -0.005 | 0.006 | 0.427    | 0.18     | 0.015  | 0.005   | 0.002   |
| rs7631156  | A | 0.31 |  | 0.13 | 0.025  | 0.006 | 7.41E-05 | 0.08     | -0.021 | 0.006   | 0.001   |
| rs765875   | C | 0.47 |  | 0.55 | -0.009 | 0.004 | 0.04     | 0.55     | 0.0001 | 0.004   | 0.918   |
| rs7678054  | G | 0.48 |  | 0.7  | -0.007 | 0.005 | 0.124    | 0.79     | 0.013  | 0.004   | 0.003   |
| rs76942203 | A | 0.06 |  | 0.1  | 0.019  | 0.007 | 0.00628  | 0.1      | -0.019 | 0.006   | 0.002   |
| rs7713317  | G | 0.72 |  | 0.67 | -0.019 | 0.004 | 3.21E-05 | 0.78     | 0.021  | 0.004   | <5E-08  |
| rs7714712  | C | 0.37 |  | 0.19 | -0.021 | 0.005 | 0.000116 | 0.14     | 0.012  | 0.005   | 0.023   |
| rs7734385  | G | 0.44 |  | 0.23 | 0.005  | 0.005 | 0.303    | 0.26     | 0.005  | 0.004   | 0.199   |
| rs7740107  | T | 0.74 |  | 0.97 | -0.035 | 0.011 | 0.00171  | 0.98     | 0.030  | 0.012   | 0.013   |
| rs77432547 | G | 0.72 |  | 0.95 | 0.011  | 0.009 | 0.232    | 0.95     | 0.020  | 0.008   | 0.013   |
| rs7769594  | T | 0.16 |  | 0.14 | -0.005 | 0.006 | 0.41     | 0.07     | -0.004 | 0.007   | 0.541   |
| rs7777084  | A | 0.46 |  | 0.41 | 0.003  | 0.004 | 0.417    | 0.37     | -0.012 | 0.004   | 0.002   |

|            |   |      |       |        |       |          |          |        |       |        |
|------------|---|------|-------|--------|-------|----------|----------|--------|-------|--------|
| rs7784465  | C | 0.86 | 0.99  | -0.006 | 0.016 | 0.724    | 0.99     | 0.009  | 0.018 | 0.624  |
| rs779206   | G | 0.72 | 0.67  | 0.006  | 0.004 | 0.16     | 0.64     | 0.004  | 0.004 | 0.249  |
| rs7802342  | G | 0.7  | 0.78  | -0.013 | 0.005 | 0.0106   | 0.74     | 0.010  | 0.004 | 0.016  |
| rs7826312  | C | 0.43 | 0.83  | 0      | 0.006 | 0.969    | 0.84     | -0.003 | 0.005 | 0.514  |
| rs786420   | T | 0.77 | 0.36  | 0.006  | 0.004 | 0.179    | 0.42     | 0.001  | 0.004 | 0.842  |
| rs7871866  | C | 0.16 | 0.19  | 0.014  | 0.006 | 0.0102   | 0.22     | -0.016 | 0.005 | <5E-08 |
| rs7893571  | T | 0.67 | 0.89  | -0.005 | 0.007 | 0.485    | 0.9      | -0.017 | 0.006 | 0.003  |
| rs7899106  | G | 0.95 | 0.99  | -0.061 | 0.035 | 0.0791   | Low MAF* |        |       |        |
| rs7903146  | C | 0.28 | 0.04  | -0.012 | 0.011 | 0.291    | 0.04     | -0.057 | 0.009 | <5E-08 |
| rs79113395 | G | 0.27 | 0.15  | -0.008 | 0.006 | 0.221    | Low MAF* |        |       |        |
| rs7944782  | G | 0.5  | 0.45  | -0.013 | 0.004 | 0.00231  | 0.55     | 0.005  | 0.004 | 0.15   |
| rs7947143  | G | 0.15 | 0.13  | 0.003  | 0.006 | 0.583    | 0.09     | 0.001  | 0.006 | 0.85   |
| rs7961979  | A | 0.13 | 0.002 | -0.042 | 0.051 | 0.411    | Low MAF* |        |       |        |
| rs7968390  | A | 0.68 | 0.57  | 0.008  | 0.004 | 0.076    | 0.41     | -0.010 | 0.004 | 0.004  |
| rs7975187  | G | 0.77 | 0.69  | 0.001  | 0.005 | 0.877    | 0.62     | 0.013  | 0.004 | 0.001  |
| rs7976757  | C | 0.18 | 0.28  | 0.001  | 0.005 | 0.816    | 0.23     | 0.007  | 0.004 | 0.091  |
| rs8016859  | C | 0.04 | 0.001 | 0.063  | 0.084 | 0.453    | Low MAF* |        |       |        |
| rs8024806  | T | 0.94 | 0.98  | -0.006 | 0.015 | 0.667    | 0.99     | 0.007  | 0.017 | 0.696  |
| rs8033510  | T | 0.36 | 0.39  | 0.008  | 0.004 | 0.0703   | 0.4      | -0.009 | 0.004 | 0.017  |
| rs8038464  | T | 0.4  | 0.5   | -0.013 | 0.004 | 0.00318  | 0.47     | 0.008  | 0.004 | 0.033  |
| rs8075273  | C | 0.29 | 0.07  | -0.007 | 0.008 | 0.392    | 0.05     | -0.004 | 0.008 | 0.633  |
| rs8081039  | T | 0.06 | 0.005 | 0.034  | 0.033 | 0.298    | 0.03     | 0.016  | 0.011 | 0.149  |
| rs8092503  | G | 0.77 | 0.57  | -0.007 | 0.004 | 0.0858   | 0.7      | 0.018  | 0.004 | <5E-08 |
| rs8122855  | A | 0.34 | 0.62  | 0.01   | 0.004 | 0.0185   | 0.62     | 0.001  | 0.004 | 0.756  |
| rs8134638  | C | 0.63 | 0.75  | 0.003  | 0.005 | 0.59     | 0.77     | 0.005  | 0.005 | 0.286  |
| rs816367   | G | 0.65 | 0.67  | -0.008 | 0.005 | 0.0766   | 0.64     | 0.008  | 0.004 | 0.023  |
| rs8181823  | C | 0.23 | 0.08  | -0.011 | 0.008 | 0.136    | 0.09     | 0.005  | 0.006 | 0.423  |
| rs845084   | A | 0.27 | 0.43  | 0.022  | 0.004 | 2.20E-07 | 0.35     | -0.013 | 0.004 | 0.001  |
| rs857601   | T | 0.71 | 0.96  | 0.001  | 0.01  | 0.906    | 0.97     | 0.030  | 0.01  | 0.003  |

|           |   |      |      |        |       |          |          |        |       |        |
|-----------|---|------|------|--------|-------|----------|----------|--------|-------|--------|
| rs867560  | G | 0.57 | 0.15 | -0.018 | 0.006 | 0.0027   | 0.1      | 0.014  | 0.006 | 0.019  |
| rs872281  | C | 0.18 | 0.32 | -0.004 | 0.005 | 0.324    | 0.25     | 0.006  | 0.004 | 0.143  |
| rs889398  | C | 0.42 | 0.12 | -0.004 | 0.007 | 0.5      | 0.14     | 0.006  | 0.005 | 0.258  |
| rs891387  | T | 0.5  | 0.08 | 0.014  | 0.008 | 0.0662   | 0.06     | -0.018 | 0.007 | 0.015  |
| rs9077    | G | 0.27 | 0.06 | -0.014 | 0.009 | 0.117    | 0.05     | -0.002 | 0.008 | 0.771  |
| rs930295  | A | 0.15 | 0.19 | 0.008  | 0.005 | 0.142    | 0.17     | -0.011 | 0.005 | 0.029  |
| rs9317002 | A | 0.51 | 0.32 | 0.008  | 0.005 | 0.0718   | 0.3      | -0.010 | 0.004 | 0.014  |
| rs9320823 | C | 0.41 | 0.42 | 0.005  | 0.004 | 0.216    | 0.37     | 0.007  | 0.004 | 0.048  |
| rs934515  | A | 0.12 | 0.2  | 0.014  | 0.005 | 0.0109   | 0.18     | 0.005  | 0.005 | 0.265  |
| rs9376609 | A | 0.38 | 0.28 | 0.006  | 0.005 | 0.224    | 0.21     | 0.007  | 0.004 | 0.091  |
| rs942066  | G | 0.63 | 0.8  | -0.007 | 0.005 | 0.202    | 0.82     | 0.018  | 0.005 | <5E-08 |
| rs944340  | T | 0.42 | 0.64 | 0.003  | 0.004 | 0.47     | 0.6      | 0.0001 | 0.004 | 0.992  |
| rs945211  | C | 0.63 | 0.32 | 0.007  | 0.005 | 0.12     | 0.3      | -0.011 | 0.004 | 0.004  |
| rs946824  | T | 0.14 | 0.11 | 0.008  | 0.007 | 0.236    | 0.09     | -0.007 | 0.006 | 0.257  |
| rs947088  | T | 0.74 | 0.99 | 0.029  | 0.029 | 0.319    | Low MAF* |        |       |        |
| rs9479509 | A | 0.29 | 0.62 | 0.008  | 0.004 | 0.0583   | 0.5      | -0.015 | 0.004 | <5E-08 |
| rs9514131 | G | 0.13 | 0.1  | -0.009 | 0.007 | 0.219    | 0.1      | 0.006  | 0.006 | 0.31   |
| rs9527455 | C | 0.23 | 0.08 | -0.019 | 0.008 | 0.0156   | Low MAF* |        |       |        |
| rs9540493 | A | 0.46 | 0.75 | 0.01   | 0.005 | 0.0615   | 0.67     | -0.016 | 0.005 | 0.001  |
| rs9571687 | C | 0.34 | 0.38 | -0.016 | 0.004 | 0.000326 | 0.37     | 0.003  | 0.004 | 0.424  |
| rs9595908 | T | 0.64 | 0.83 | 0.009  | 0.006 | 0.0989   | 0.84     | -0.014 | 0.005 | 0.006  |
| rs9603697 | T | 0.32 | 0.48 | 0.01   | 0.004 | 0.0176   | 0.49     | -0.007 | 0.004 | 0.061  |
| rs972540  | G | 0.72 | 0.8  | -0.005 | 0.005 | 0.327    | 0.83     | 0.013  | 0.005 | 0.008  |
| rs9808302 | G | 0.53 | 0.52 | 0.004  | 0.004 | 0.315    | 0.47     | -0.007 | 0.004 | 0.038  |
| rs9816029 | C | 0.34 | 0.08 | 0.015  | 0.008 | 0.047    | 0.09     | -0.005 | 0.006 | 0.403  |
| rs9816226 | T | 0.18 | 0.05 | -0.061 | 0.01  | 1.27E-09 | 0.02     | 0.040  | 0.015 | 0.008  |
| rs9818122 | C | 0.79 | 0.99 | -0.013 | 0.031 | 0.673    | Low MAF* |        |       |        |
| rs9826775 | A | 0.85 | 0.86 | -0.007 | 0.006 | 0.24     | 0.87     | -0.005 | 0.005 | 0.338  |
| rs9839267 | T | 0.89 | 0.85 | 0.028  | 0.006 | 2.60E-06 | 0.83     | -0.011 | 0.005 | 0.018  |

|           |   |      |  |      |        |       |          |          |        |       |        |
|-----------|---|------|--|------|--------|-------|----------|----------|--------|-------|--------|
| rs9839653 | G | 0.83 |  | 0.99 | -0.071 | 0.046 | 0.122    | Low MAF* |        |       |        |
| rs985060  | G | 0.27 |  | 0.43 | -0.002 | 0.004 | 0.601    | 0.39     | 0.001  | 0.004 | 0.846  |
| rs9862795 | T | 0.52 |  | 0.85 | 0.005  | 0.006 | 0.388    | 0.84     | 0.015  | 0.005 | 0.002  |
| rs987071  | C | 0.77 |  | 0.99 | 0.012  | 0.026 | 0.648    | Low MAF* |        |       |        |
| rs9929792 | A | 0.5  |  | 0.86 | 0.013  | 0.006 | 0.0269   | 0.91     | 0.013  | 0.006 | 0.042  |
| rs9937053 | A | 0.44 |  | 0.17 | 0.072  | 0.006 | 2.09E-38 | 0.23     | -0.069 | 0.004 | <5E-08 |
| rs9965170 | G | 0.43 |  | 0.14 | -0.009 | 0.006 | 0.152    | 0.15     | 0.012  | 0.005 | 0.016  |

Abbreviation: EAF, effect allele frequency.

\*Low minor allele frequency (MAF, <1%) in the BBJ population.

**eTable 5. Associations of potential confounders with BMI GRS**

| <b>Confounder</b>        | <b>OR (95% CI) per 1-SD higher genetically-instrumented BMI</b> |
|--------------------------|-----------------------------------------------------------------|
| <b>Current smoking</b>   | 1.03 (0.94, 1.13)                                               |
| <b>Weekly drinking</b>   | 1.09 (0.98, 1.21)                                               |
| <b>Physical activity</b> | 0.93 (0.82, 1.04)                                               |
| <b>Education</b>         | 0.99 (0.89, 1.10)                                               |
| <b>Income</b>            | 1.02 (0.95, 1.09)                                               |

The model was adjusted for age at baseline, age squared, sex, 10 regions, and 12 PCs, education, smoking, and alcohol.

Potential confounders were dichotomised: current smoking (yes vs no), weekly drinking (yes vs no), total PA ( $\geq 30$  vs  $< 30$  MET-h/day), education ( $\geq 9$  vs  $< 9$  years), and household income ( $\geq 10,000$  vs  $< 10,000$  RMB/year).

The analyses of smoking and alcohol were conducted in men due to the small number of women who smoked (3%) or drank (2%).

**eTable 6. Baseline characteristics of study participants by BMI in all CKB participants**

| Variable*                                            | BMI categories (kg/m <sup>2</sup> ) |              |              |              |              |                     |
|------------------------------------------------------|-------------------------------------|--------------|--------------|--------------|--------------|---------------------|
|                                                      | <20                                 | 20 to <22.5  | 22.5 to <25  | 25 to <27.5  | ≥27.5        | All                 |
|                                                      | (n=65,986)                          | (n=131,198)  | (n=144,703)  | (n=85,427)   | (n=82,578)   | (n=512,715)         |
| Age (SD), year                                       | 52.4 (13.0)                         | 50.7 (10.9)  | 51.0 (10.3)  | 51.5 (10.2)  | 51.6 (10.9)  | <b>51.5 (10.7)</b>  |
| Female, %                                            | 55.8                                | 57.0         | 59.5         | 59.5         | 64.1         | <b>59.2</b>         |
| <b>Socioeconomic and lifestyle factors</b>           |                                     |              |              |              |              |                     |
| Urban resident, %                                    | 31.5                                | 37.2         | 45.4         | 51.1         | 55.7         | <b>44.1</b>         |
| ≥9 years of education, %                             | 20                                  | 21.1         | 21.8         | 21.5         | 20.4         | <b>20.9</b>         |
| Household income ≥35 000 RMB/year, %                 | 14.8                                | 16.7         | 18.6         | 19.7         | 20.1         | <b>17.9</b>         |
| Ever regular smoking, %                              |                                     |              |              |              |              |                     |
| Male                                                 | 76                                  | 71.4         | 65.7         | 62.8         | 61.4         | <b>67.7</b>         |
| Female                                               | 4.2                                 | 3            | 2.7          | 2.4          | 2.6          | <b>2.8</b>          |
| Weekly drinking %                                    |                                     |              |              |              |              |                     |
| Male                                                 | 31.5                                | 34.1         | 33.8         | 32.7         | 32.4         | <b>33.5</b>         |
| Female                                               | 2.1                                 | 2.1          | 2.1          | 2.1          | 1.9          | <b>2.1</b>          |
| Total physical activity (SD), MET h/day              | 21.4 (13.9)                         | 21.8 (14.3)  | 21.3 (14.0)  | 20.6 (13.6)  | 19.8 (13.0)  | <b>21.1 (13.9)</b>  |
| <b>Blood pressure, blood sugar and anthropometry</b> |                                     |              |              |              |              |                     |
| SBP (SD), mmHg                                       | 123.0 (20.9)                        | 127.2 (20.4) | 131.2 (20.6) | 134.9 (20.8) | 139.4 (21.3) | <b>131.1 (21.3)</b> |
| RPG (SD), mmol/L                                     | 5.9 (2.1)                           | 5.9 (2.1)    | 6.0 (2.3)    | 6.2 (2.5)    | 6.4 (2.7)    | <b>6.1 (2.3)</b>    |
| BMI (SD), kg/m <sup>2</sup>                          | 18.7 (1.1)                          | 21.3 (0.7)   | 23.7 (0.7)   | 25.9 (0.6)   | 29.0 (2.0)   | <b>23.7 (3.4)</b>   |
| Waist circumference (SD), cm                         | 68.3 (5.2)                          | 74.5 (5.3)   | 80.6 (5.8)   | 86.0 (5.9)   | 93.0 (7.4)   | <b>80.3 (9.8)</b>   |
| Hip circumference (SD), cm                           | 83.6 (4.3)                          | 87.4 (4.2)   | 90.9 (4.4)   | 94.2 (4.5)   | 99.0 (5.9)   | <b>90.9 (6.9)</b>   |
| Waist-to-hip ratio (SD)                              | 0.82 (0.06)                         | 0.85 (0.06)  | 0.89 (0.06)  | 0.91 (0.06)  | 0.94 (0.07)  | <b>0.90 (0.07)</b>  |
| <b>Prior disease history, %</b>                      |                                     |              |              |              |              |                     |
| Diabetes                                             | 3.4                                 | 4.3          | 5.8          | 7.2          | 9.1          | <b>5.9</b>          |
| CHD                                                  | 1.9                                 | 2.2          | 2.9          | 3.5          | 4.3          | <b>5.9</b>          |
| Stroke or TIA                                        | 1.0                                 | 1.4          | 1.8          | 2.0          | 2.3          | <b>1.7</b>          |
| Hypertension                                         | 4.6                                 | 7.3          | 11.2         | 15.5         | 21.5         | <b>11.6</b>         |
| Family history of diabetes                           | 3.7                                 | 4.2          | 5.0          | 5.4          | 6.0          | <b>4.9</b>          |
| Family history of cancer                             | 13.0                                | 13.5         | 14.2         | 14.4         | 14.6         | <b>13.9</b>         |

\* Results were adjusted for age, region, and sex (where appropriate). Values are means unless otherwise stated.

Abbreviations: MET=metabolic equivalent of task; SBP=systolic blood pressure; RPG=random plasma glucose; BMI=body mass index; HBsAg=hepatitis B surface antigen;

CHD=coronary heart disease; TIA=transient ischaemic attack.



**eTable 7. Associations of BMI with proteomics and of proteomics with CVD**

| Protein                       | Observational                       |                 |                 | MR-IPD                              | MR-Egger                            |                        | Weighted median                     | Observational: proteins and CVD |                 |                 |
|-------------------------------|-------------------------------------|-----------------|-----------------|-------------------------------------|-------------------------------------|------------------------|-------------------------------------|---------------------------------|-----------------|-----------------|
|                               | SD difference (95% CI) <sup>1</sup> | Uncorrected     | FDR-adjusted    | SD difference (95% CI) <sup>2</sup> | SD difference (95% CI) <sup>2</sup> | <i>p</i> for intercept | SD difference (95% CI) <sup>2</sup> | HR (95% CI) <sup>3</sup>        | Uncorrected     | FDR-adjusted    |
|                               |                                     | <i>p</i> -value | <i>p</i> -value |                                     |                                     |                        |                                     |                                 | <i>p</i> -value | <i>p</i> -value |
| <b>Chemokines</b>             |                                     |                 |                 |                                     |                                     |                        |                                     |                                 |                 |                 |
| CCL3                          | <b>0.11 (0.03,0.19)</b>             | 8.97E-03        | 2.88E-02        | 0.33 (0.20,0.47)                    | 0.21 (-0.11,0.53)                   | 0.06                   | 0.24 (0.08,0.39)                    | 1.10 (0.90,1.33)                | 0.349           | 0.777           |
| CCL4                          | 0.05 (-0.04,0.13)                   | 2.91E-01        | 5.15E-01        | 0.27 (0.14,0.41)                    | 0.17 (-0.10,0.45)                   | 0.07                   | 0.19 (0.04,0.35)                    | 0.96 (0.79,1.16)                | 0.679           | 0.902           |
| CCL17                         | -0.03 (-0.11,0.04)                  | 3.94E-01        | 5.96E-01        | -0.10 (-0.25,0.04)                  | -0.07 (-0.28,0.15)                  | 0.48                   | -0.07 (-0.24,0.10)                  | 0.84 (0.69,1.03)                | 0.099           | 0.547           |
| CCL19                         | <b>0.18 (0.10,0.27)</b>             | 1.85E-05        | 2.01E-04        | 0.12 (-0.00,0.25)                   | 0.08 (-0.12,0.28)                   | 0.34                   | 0.09 (-0.06,0.23)                   | 1.02 (0.85,1.21)                | 0.869           | 0.978           |
| CCL20                         | <b>0.12 (0.03,0.20)</b>             | 8.67E-03        | 2.88E-02        | 0.06 (-0.06,0.18)                   | 0.04 (-0.14,0.22)                   | 0.62                   | 0.04 (-0.10,0.19)                   | <b>1.19 (1.01,1.41)</b>         | 0.041           | 0.372           |
| CCL23                         | -0.06 (-0.15,0.02)                  | 1.53E-01        | 3.29E-01        | 0.01 (-0.12,0.14)                   | 0.01 (-0.18,0.20)                   | 0.91                   | 0.01 (-0.15,0.16)                   | 0.99 (0.82,1.19)                | 0.903           | 0.984           |
| MCP1                          | <b>0.12 (0.04,0.20)</b>             | 4.78E-03        | 1.96E-02        | 0.37 (0.23,0.52)                    | 0.24 (-0.12,0.59)                   | 0.08                   | 0.27 (0.10,0.43)                    | 1.12 (0.93,1.36)                | 0.236           | 0.733           |
| MCP2                          | -0.05 (-0.14,0.03)                  | 2.20E-01        | 4.22E-01        | 0.18 (0.06,0.30)                    | 0.11 (-0.10,0.33)                   | 0.12                   | 0.13 (-0.01,0.27)                   | 1.03 (0.85,1.27)                | 0.738           | 0.921           |
| MCP3                          | <b>0.11 (0.02,0.19)</b>             | 1.15E-02        | 3.46E-02        | 0.09 (-0.02,0.20)                   | 0.05 (-0.11,0.22)                   | 0.44                   | 0.06 (-0.07,0.19)                   | <b>1.28 (1.09,1.50)</b>         | 0.002           | 0.068           |
| MCP4                          | 0.03 (-0.04,0.11)                   | 3.97E-01        | 5.96E-01        | 0.10 (-0.03,0.23)                   | 0.06 (-0.14,0.26)                   | 0.46                   | 0.07 (-0.08,0.22)                   | 1.13 (0.92,1.39)                | 0.258           | 0.748           |
| CXCL1                         | -0.01 (-0.09,0.07)                  | 8.68E-01        | 9.77E-01        | -0.21 (-0.36,-0.06)                 | -0.13 (-0.40,0.13)                  | 0.13                   | -0.15 (-0.32,0.02)                  | 0.97 (0.79,1.20)                | 0.804           | 0.952           |
| CXCL5                         | -0.00 (-0.08,0.08)                  | 9.65E-01        | 9.91E-01        | -0.07 (-0.18,0.04)                  | -0.04 (-0.21,0.12)                  | 0.55                   | -0.05 (-0.18,0.08)                  | 0.92 (0.75,1.14)                | 0.457           | 0.893           |
| CXCL9                         | 0.02 (-0.06,0.11)                   | 6.09E-01        | 8.18E-01        | -0.09 (-0.20,0.03)                  | -0.05 (-0.23,0.12)                  | 0.48                   | -0.06 (-0.20,0.08)                  | 1.13 (0.93,1.38)                | 0.219           | 0.733           |
| CXCL10                        | <b>0.14 (0.06,0.23)</b>             | 7.35E-04        | 4.72E-03        | 0.22 (0.09,0.35)                    | 0.14 (-0.10,0.38)                   | 0.06                   | 0.16 (0.01,0.30)                    | 1.13 (0.93,1.37)                | 0.219           | 0.733           |
| CXCL11                        | 0.01 (-0.08,0.10)                   | 8.32E-01        | 9.48E-01        | 0.12 (0.04,0.20)                    | 0.08 (-0.07,0.22)                   | 0.12                   | 0.09 (-0.01,0.18)                   | 0.89 (0.72,1.08)                | 0.231           | 0.733           |
| CXCL12                        | -0.09 (-0.18,-0.00)                 | 4.60E-02        | 1.25E-01        | -0.25 (-0.37,-0.13)                 | -0.16 (-0.42,0.11)                  | 0.08                   | -0.18 (-0.32,-0.03)                 | 0.92 (0.75,1.12)                | 0.396           | 0.848           |
| CXCL13                        | 0.01 (-0.08,0.10)                   | 8.19E-01        | 9.45E-01        | -0.48 (-0.68,-0.29)                 | -0.31 (-0.78,0.17)                  | 0.07                   | -0.35 (-0.57,-0.12)                 | <b>1.23 (1.01,1.50)</b>         | 0.037           | 0.365           |
| CX3CL1                        | -0.04 (-0.12,0.04)                  | 3.21E-01        | 5.45E-01        | -0.29 (-0.40,-0.17)                 | -0.18 (-0.47,0.10)                  | 0.08                   | -0.20 (-0.34,-0.07)                 | 1.06 (0.87,1.29)                | 0.566           | 0.893           |
| <b>Inflammatory cytokines</b> |                                     |                 |                 |                                     |                                     |                        |                                     |                                 |                 |                 |
| <i>Interleukins</i>           |                                     |                 |                 |                                     |                                     |                        |                                     |                                 |                 |                 |
| IL1-alpha                     | 0.02 (-0.07,0.11)                   | 7.17E-01        | 9.05E-01        | 0.06 (0.26,-0.15)                   | 0.03 (0.32,-0.25)                   | 0.77                   | 0.04 (0.28,-0.20)                   | 1.12 (0.92,1.37)                | 0.995           | 0.997           |
| IL2                           | -0.00 (-0.09,0.09)                  | 9.36E-01        | 9.91E-01        | -0.33 (-0.48,-0.18)                 | -0.21 (-0.54,0.12)                  | 0.06                   | -0.23 (-0.41,-0.06)                 | 0.63 (0.00, 1.01)               | 0.996           | 0.997           |
| IL4                           | -0.00 (-0.09,0.08)                  | 9.27E-01        | 9.91E-01        | -0.15 (-0.23,-0.06)                 | -0.09 (-0.26,0.07)                  | 0.06                   | -0.11 (-0.20,-0.01)                 | 0.93 (0.82,1.06)                | 0.306           | 0.761           |
| IL5                           | 0.07 (-0.02,0.16)                   | 1.37E-01        | 3.01E-01        | 0.25 (0.05,0.44)                    | 0.16 (-0.17,0.49)                   | 0.20                   | 0.18 (-0.06,0.41)                   | 1.04 (0.86,1.24)                | 0.706           | 0.904           |
| IL6                           | <b>0.21 (0.12,0.29)</b>             | 2.12E-06        | 3.18E-05        | 0.35 (0.22,0.49)                    | 0.22 (-0.11,0.56)                   | 0.07                   | 0.25 (0.09,0.41)                    | <b>1.21 (1.02,1.48)</b>         | 0.040           | 0.785           |
| IL7                           | 0.00 (-0.09,0.09)                   | 9.61E-01        | 9.91E-01        | -0.01 (-0.01,0.00)                  | -0.00 (-0.01,0.01)                  | 0.36                   | -0.00 (-0.01,0.00)                  | 1.08 (0.90,1.29)                | 0.415           | 0.868           |
| IL8                           | 0.02 (-0.07,0.10)                   | 6.71E-01        | 8.75E-01        | 0.11 (-0.69,0.91)                   | 0.07 (-1.07,1.21)                   | 0.88                   | 0.08 (-0.87,1.02)                   | 1.06 (0.87,1.28)                | 0.584           | 0.893           |
| IL10                          | 0.07 (-0.02,0.16)                   | 1.24E-01        | 2.86E-01        | 0.05 (-0.06,0.16)                   | 0.03 (-0.13,0.19)                   | 0.62                   | 0.03 (-0.09,0.16)                   | 1.07 (0.87,1.31)                | 0.542           | 0.893           |

| Protein                           | Observational                       |             |              | MR-IPD                              | MR-Egger                            |                 | Weighted median                     | Observational: proteins and CVD |             |              |
|-----------------------------------|-------------------------------------|-------------|--------------|-------------------------------------|-------------------------------------|-----------------|-------------------------------------|---------------------------------|-------------|--------------|
|                                   | SD difference (95% CI) <sup>1</sup> | Uncorrected | FDR-adjusted | SD difference (95% CI) <sup>2</sup> | SD difference (95% CI) <sup>2</sup> | p for intercept | SD difference (95% CI) <sup>2</sup> | HR (95% CI) <sup>3</sup>        | Uncorrected | FDR-adjusted |
|                                   |                                     | p-value     | p-value      |                                     |                                     |                 |                                     |                                 | p-value     | p-value      |
| IL12                              | <b>0.13 (0.05,0.21)</b>             | 1.32E-03    | 6.27E-03     | -0.22 (-0.35,-0.09)                 | -0.14 (-0.38,0.11)                  | 0.07            | -0.16 (-0.31,-0.01)                 | 0.91 (0.75,1.10)                | 0.333       | 0.768        |
| IL12-RB1                          | 0.03 (-0.06,0.12)                   | 4.94E-01    | 6.94E-01     | -0.03 (-0.11,0.04)                  | -0.02 (-0.13,0.09)                  | 0.62            | -0.02 (-0.11,0.06)                  | 1.03 (0.86,1.23)                | 0.757       | 0.921        |
| IL13                              | -0.05 (-0.14,0.04)                  | 2.53E-01    | 4.65E-01     | -0.08 (-0.21,0.05)                  | -0.05 (-0.24,0.13)                  | 0.53            | -0.06 (-0.20,0.09)                  | 0.98 (0.81,1.20)                | 0.863       | 0.978        |
| IL18                              | <b>0.13 (0.05,0.21)</b>             | 1.96E-03    | 8.40E-03     | 0.28 (0.15,0.40)                    | 0.17 (-0.10,0.45)                   | 0.06            | 0.20 (0.05,0.35)                    | <b>1.25 (1.02,1.54)</b>         | 0.034       | 0.365        |
| IL33                              | -0.06 (-0.15,0.02)                  | 1.59E-01    | 3.33E-01     | 0.21 (0.07,0.34)                    | 0.13 (-0.11,0.37)                   | 0.10            | 0.15 (-0.01,0.30)                   | 0.36 (0.07,1.94)                | 0.235       | 0.733        |
| <b>Interferon</b>                 |                                     |             |              |                                     |                                     |                 |                                     |                                 |             |              |
| IFN-beta                          | -0.00 (-0.09,0.09)                  | 9.93E-01    | 9.93E-01     | 0.03 (0.06,0.00)                    | 0.02 (0.07,-0.03)                   | 0.25            | 0.02 (0.06,-0.01)                   | 0.85 (0.68,1.08)                | 0.184       | 0.733        |
| IFN-gamma                         | -0.03 (-0.12,0.06)                  | 5.77E-01    | 7.87E-01     | -0.11 (-0.24,0.01)                  | -0.07 (-0.26,0.12)                  | 0.36            | -0.08 (-0.22,0.06)                  | 0.92 (0.63,1.34)                | 0.665       | 0.902        |
| <b>TNF(R) superfamily</b>         |                                     |             |              |                                     |                                     |                 |                                     |                                 |             |              |
| TNF                               | -0.01 (-0.10,0.07)                  | 7.48E-01    | 9.09E-01     | -0.21 (-0.28,-0.14)                 | -0.14 (-0.34,0.07)                  | 0.06            | -0.15 (-0.23,-0.07)                 | 0.75 (0.43,1.32)                | 0.321       | 0.761        |
| TNFSF14                           | <b>0.27 (0.18,0.35)</b>             | 4.78E-10    | 1.43E-08     | 0.13 (-0.01,0.27)                   | 0.08 (-0.14,0.30)                   | 0.36            | 0.09 (-0.07,0.25)                   | 1.04 (0.87,1.26)                | 0.646       | 0.902        |
| TRAIL                             | <b>0.19 (0.10,0.28)</b>             | 1.80E-05    | 2.01E-04     | 0.61 (0.43,0.79)                    | 0.39 (-0.17,0.95)                   | 0.06            | 0.44 (0.23,0.64)                    | 0.90 (0.74,1.10)                | 0.300       | 0.761        |
| TWEAK                             | <b>-0.14 (-0.23,-0.06)</b>          | 1.26E-03    | 6.27E-03     | -0.06 (-0.19,0.07)                  | -0.04 (-0.23,0.15)                  | 0.62            | -0.04 (-0.20,0.11)                  | <b>0.76 (0.64,0.91)</b>         | 0.002       | 0.068        |
| TNFRSF4                           | 0.04 (-0.05,0.12)                   | 3.69E-01    | 5.72E-01     | 0.03 (-0.09,0.14)                   | 0.02 (-0.15,0.19)                   | 0.82            | 0.02 (-0.12,0.16)                   | 1.05 (0.87,1.28)                | 0.611       | 0.893        |
| TNFRSF9                           | 0.05 (-0.03,0.13)                   | 2.14E-01    | 4.19E-01     | -0.04 (-0.17,0.09)                  | -0.02 (-0.21,0.17)                  | 0.77            | -0.03 (-0.18,0.13)                  | 1.05 (0.87,1.27)                | 0.625       | 0.893        |
| TNFRSF12A                         | <b>0.11 (0.03,0.18)</b>             | 6.57E-03    | 2.37E-02     | 0.13 (0.01,0.25)                    | 0.08 (-0.11,0.28)                   | 0.29            | 0.09 (-0.05,0.23)                   | 1.20 (0.99,1.46)                | 0.065       | 0.456        |
| TNFRSF21                          | 0.00 (-0.08,0.09)                   | 9.56E-01    | 9.91E-01     | -0.13 (-0.21,-0.05)                 | -0.08 (-0.23,0.06)                  | 0.07            | -0.09 (-0.18,-0.00)                 | 0.95 (0.78,1.15)                | 0.609       | 0.893        |
| CD27                              | -0.04 (-0.12,0.04)                  | 3.15E-01    | 5.45E-01     | -0.28 (-0.41,-0.15)                 | -0.18 (-0.46,0.11)                  | 0.07            | -0.20 (-0.35,-0.05)                 | 1.06 (0.87,1.29)                | 0.588       | 0.893        |
| CD40                              | 0.08 (-0.01,0.16)                   | 7.94E-02    | 1.88E-01     | 0.07 (-0.06,0.20)                   | 0.05 (-0.15,0.24)                   | 0.59            | 0.05 (-0.10,0.21)                   | 0.91 (0.75,1.10)                | 0.319       | 0.761        |
| CD40L                             | 0.00 (-0.08,0.09)                   | 9.12E-01    | 9.91E-01     | 0.04 (0.09,-0.01)                   | 0.03 (0.10,-0.05)                   | 0.46            | 0.03 (0.09,-0.03)                   | 0.94 (0.77,1.14)                | 0.530       | 0.893        |
| CD70                              | <b>0.14 (0.06,0.22)</b>             | 9.61E-04    | 5.41E-03     | 0.11 (-0.02,0.24)                   | 0.07 (-0.13,0.27)                   | 0.42            | 0.08 (-0.07,0.23)                   | 1.12 (0.92,1.36)                | 0.267       | 0.750        |
| FasLG                             | <b>-0.11 (-0.19,-0.03)</b>          | 6.86E-03    | 2.37E-02     | -0.11 (-0.24,0.01)                  | -0.07 (-0.27,0.13)                  | 0.38            | -0.08 (-0.23,0.07)                  | <b>0.77 (0.62,0.95)</b>         | 0.016       | 0.283        |
| <b>Growth factors (receptors)</b> |                                     |             |              |                                     |                                     |                 |                                     |                                 |             |              |
| ANG1                              | -0.01 (-0.09,0.07)                  | 8.07E-01    | 9.45E-01     | -0.16 (-0.30,-0.01)                 | -0.10 (-0.33,0.14)                  | 0.28            | -0.11 (-0.28,0.06)                  | 0.94 (0.76,1.15)                | 0.539       | 0.893        |
| ANGPT2                            | 0.01 (-0.07,0.10)                   | 7.40E-01    | 9.09E-01     | 0.16 (-0.03,0.36)                   | 0.10 (-0.20,0.41)                   | 0.42            | 0.12 (-0.12,0.35)                   | 0.96 (0.78,1.17)                | 0.681       | 0.902        |
| CSF1                              | <b>0.17 (0.09,0.25)</b>             | 7.74E-05    | 6.33E-04     | -0.18 (-0.31,-0.04)                 | -0.11 (-0.34,0.12)                  | 0.16            | -0.13 (-0.28,0.03)                  | 1.12 (0.92,1.35)                | 0.255       | 0.748        |
| EGF                               | 0.05 (-0.03,0.13)                   | 2.36E-01    | 4.43E-01     | -0.34 (-0.53,-0.15)                 | -0.22 (-0.59,0.16)                  | 0.06            | -0.24 (-0.46,-0.03)                 | 0.91 (0.74,1.11)                | 0.354       | 0.777        |
| FGF2                              | 0.07 (-0.02,0.16)                   | 1.35E-01    | 3.01E-01     | -0.14 (-0.29,0.02)                  | -0.09 (-0.33,0.15)                  | 0.38            | -0.10 (-0.28,0.08)                  | 1.08 (0.89,1.30)                | 0.425       | 0.869        |
| HGF                               | <b>0.31 (0.24,0.39)</b>             | 2.22E-15    | 1.99E-13     | 0.06 (-0.07,0.19)                   | 0.04 (-0.15,0.23)                   | 0.62            | 0.04 (-0.11,0.19)                   | <b>1.22 (1.02,1.44)</b>         | 0.045       | 0.863        |
| LAP-TGF-beta1                     | 0.03 (-0.05,0.11)                   | 4.86E-01    | 6.94E-01     | -0.15 (-0.22,-0.08)                 | -0.09 (-0.25,0.06)                  | 0.09            | -0.11 (-0.19,-0.03)                 | 0.84 (0.67,1.05)                | 0.132       | 0.625        |
| PDGF_subunit_b                    | -0.00 (-0.08,0.08)                  | 9.51E-01    | 9.91E-01     | -0.94 (-1.46,-0.43)                 | -0.60 (-1.62,0.42)                  | 0.06            | -0.67 (-1.26,-0.08)                 | 0.99 (0.81,1.22)                | 0.948       | 0.997        |

| Protein                  | Observational                       | MR-IPD              |                      | MR-Egger                            | Weighted median                     | Observational: proteins and CVD |                                     |                          |                     |                      |
|--------------------------|-------------------------------------|---------------------|----------------------|-------------------------------------|-------------------------------------|---------------------------------|-------------------------------------|--------------------------|---------------------|----------------------|
|                          | SD difference (95% CI) <sup>1</sup> | Uncorrected p-value | FDR-adjusted p-value | SD difference (95% CI) <sup>2</sup> | SD difference (95% CI) <sup>2</sup> | p for intercept                 | SD difference (95% CI) <sup>2</sup> | HR (95% CI) <sup>3</sup> | Uncorrected p-value | FDR-adjusted p-value |
| PGF                      | <b>0.15 (0.07,0.23)</b>             | 2.38E-04            | 1.79E-03             | -0.19 (-0.32,-0.06)                 | -0.12 (-0.36,0.11)                  | 0.12                            | -0.14 (-0.29,0.01)                  | 1.06 (0.88,1.28)         | 0.531               | 0.893                |
| PTN                      | 0.07 (0.01,0.13)                    | 2.53E-02            | 7.36E-02             | 0.12 (-0.05,0.29)                   | 0.08 (-0.18,0.33)                   | 0.48                            | 0.09 (-0.11,0.29)                   | 1.08 (0.81,1.45)         | 0.595               | 0.893                |
| VEGFA                    | <b>0.20 (0.12,0.27)</b>             | 1.13E-06            | 2.04E-05             | -0.01 (-0.14,0.12)                  | -0.01 (-0.19,0.18)                  | 0.93                            | -0.01 (-0.16,0.14)                  | 1.02 (0.84,1.24)         | 0.851               | 0.978                |
| VEGFC                    | -0.03 (-0.11,0.06)                  | 5.23E-01            | 7.24E-01             | 0.42 (0.76,0.08)                    | 0.27 (0.84,-0.31)                   | 0.20                            | 0.30 (0.70,-0.10)                   | 0.86 (0.70,1.04)         | 0.125               | 0.625                |
| VEGFR2                   | <b>0.12 (0.04,0.20)</b>             | 5.13E-03            | 2.01E-02             | 0.18 (0.05,0.31)                    | 0.11 (-0.11,0.34)                   | 0.15                            | 0.13 (-0.03,0.28)                   | <b>0.83 (0.69,1.00)</b>  | 0.045               | 0.372                |
| <b>Other proteins</b>    |                                     |                     |                      |                                     |                                     |                                 |                                     |                          |                     |                      |
| <b>Enzymes</b>           |                                     |                     |                      |                                     |                                     |                                 |                                     |                          |                     |                      |
| ADA                      | <b>0.17 (0.09,0.26)</b>             | 6.08E-05            | 5.48E-04             | 0.21 (0.08,0.35)                    | 0.13 (-0.11,0.38)                   | 0.10                            | 0.15 (-0.01,0.31)                   | 1.06 (0.87,1.30)         | 0.549               | 0.893                |
| ARG1                     | <b>0.13 (0.05,0.21)</b>             | 1.50E-03            | 6.75E-03             | -0.06 (-0.18,0.07)                  | -0.04 (-0.22,0.15)                  | 0.62                            | -0.04 (-0.19,0.11)                  | <b>1.25 (1.02,1.51)</b>  | 0.029               | 0.365                |
| CAIX                     | <b>-0.14 (-0.22,-0.05)</b>          | 1.29E-03            | 6.27E-03             | -0.06 (-0.19,0.06)                  | -0.04 (-0.22,0.14)                  | 0.62                            | -0.05 (-0.19,0.10)                  | 1.00 (0.81,1.24)         | 0.974               | 0.997                |
| CASP8                    | <b>0.18 (0.10,0.26)</b>             | 2.01E-05            | 2.01E-04             | -0.19 (-0.31,-0.06)                 | -0.12 (-0.35,0.11)                  | 0.13                            | -0.13 (-0.28,0.02)                  | <b>1.40 (1.16,1.70)</b>  | 0.001               | 0.052                |
| GZMA                     | <b>0.14 (0.06,0.23)</b>             | 8.30E-04            | 4.98E-03             | -0.08 (-0.22,0.07)                  | -0.05 (-0.26,0.17)                  | 0.62                            | -0.05 (-0.22,0.12)                  | 0.96 (0.79,1.16)         | 0.672               | 0.902                |
| GZMB                     | <b>0.12 (0.03,0.21)</b>             | 6.76E-03            | 2.37E-02             | 0.30 (0.14,0.45)                    | 0.19 (-0.13,0.50)                   | 0.07                            | 0.21 (0.03,0.39)                    | 0.94 (0.77,1.14)         | 0.503               | 0.893                |
| GZMH                     | 0.05 (-0.04,0.13)                   | 2.92E-01            | 5.15E-01             | 0.12 (-0.03,0.27)                   | 0.08 (-0.15,0.30)                   | 0.42                            | 0.09 (-0.09,0.26)                   | 0.98 (0.81,1.19)         | 0.860               | 0.978                |
| HO1                      | 0.08 (-0.00,0.17)                   | 5.99E-02            | 1.54E-01             | 0.32 (0.18,0.45)                    | 0.20 (-0.11,0.51)                   | 0.08                            | 0.23 (0.06,0.39)                    | 1.06 (0.87,1.29)         | 0.565               | 0.893                |
| MMP7                     | 0.02 (-0.07,0.10)                   | 7.24E-01            | 9.05E-01             | -0.45 (-0.22,-0.69)                 | -0.29 (0.19,-0.76)                  | 0.06                            | -0.32 (-0.04,-0.60)                 | 1.00 (0.81,1.24)         | 0.979               | 0.997                |
| MMP12                    | -0.00 (-0.08,0.07)                  | 9.69E-01            | 9.91E-01             | -0.08 (-0.28,0.11)                  | -0.05 (-0.34,0.23)                  | 0.63                            | -0.06 (-0.29,0.17)                  | 1.15 (0.91,1.45)         | 0.234               | 0.733                |
| NOS3                     | 0.08 (-0.01,0.16)                   | 7.80E-02            | 1.88E-01             | -0.26 (-0.38,-0.14)                 | -0.17 (-0.44,0.11)                  | 0.07                            | -0.19 (-0.33,-0.04)                 | 1.13 (0.94,1.35)         | 0.185               | 0.733                |
| <b>Membrane proteins</b> |                                     |                     |                      |                                     |                                     |                                 |                                     |                          |                     |                      |
| CD4                      | 0.06 (-0.03,0.15)                   | 1.67E-01            | 3.41E-01             | -4.42 (-2.49,-6.35)                 | -2.80 (1.57,-7.18)                  | 0.08                            | -3.15 (-0.90,-5.40)                 | 0.99 (0.82,1.20)         | 0.951               | 0.997                |
| CD5                      | 0.08 (-0.00,0.17)                   | 5.32E-02            | 1.41E-01             | -0.32 (-0.45,-0.19)                 | -0.20 (-0.52,0.11)                  | 0.06                            | -0.23 (-0.38,-0.07)                 | 0.93 (0.77,1.14)         | 0.494               | 0.893                |
| CD8A                     | -0.02 (-0.10,0.07)                  | 7.17E-01            | 9.05E-01             | -0.06 (-0.16,0.03)                  | -0.04 (-0.18,0.10)                  | 0.53                            | -0.04 (-0.16,0.07)                  | 0.93 (0.76,1.14)         | 0.474               | 0.893                |
| CD28                     | 0.04 (-0.05,0.13)                   | 3.48E-01            | 5.59E-01             | -0.20 (-0.29,-0.10)                 | -0.13 (-0.33,0.08)                  | 0.06                            | -0.14 (-0.25,-0.03)                 | <b>0.75 (0.59,0.96)</b>  | 0.021               | 0.308                |
| CD83                     | 0.09 (0.00,0.17)                    | 4.26E-02            | 1.20E-01             | -0.06 (-0.19,0.07)                  | -0.04 (-0.22,0.15)                  | 0.62                            | -0.04 (-0.19,0.11)                  | 1.06 (0.88,1.27)         | 0.551               | 0.893                |
| CD244                    | 0.04 (-0.04,0.12)                   | 3.64E-01            | 5.72E-01             | 0.02 (-0.11,0.15)                   | 0.01 (-0.17,0.20)                   | 0.88                            | 0.01 (-0.14,0.17)                   | <b>0.76 (0.62,0.92)</b>  | 0.005               | 0.121                |
| CRTAM                    | -0.03 (-0.11,0.05)                  | 4.35E-01            | 6.42E-01             | -0.50 (-0.68,-0.31)                 | -0.31 (-0.79,0.16)                  | 0.06                            | -0.35 (-0.57,-0.14)                 | 0.97 (0.78,1.20)         | 0.775               | 0.929                |
| ICOSLG                   | -0.08 (-0.16,0.01)                  | 6.97E-02            | 1.74E-01             | -0.25 (-0.37,-0.12)                 | -0.16 (-0.41,0.10)                  | 0.07                            | -0.18 (-0.32,-0.03)                 | 0.81 (0.62,1.05)         | 0.103               | 0.547                |
| KLRD1                    | 0.04 (-0.04,0.12)                   | 3.42E-01            | 5.59E-01             | 0.22 (0.10,0.34)                    | 0.14 (-0.10,0.37)                   | 0.05                            | 0.15 (0.01,0.29)                    | 1.01 (0.83,1.23)         | 0.895               | 0.984                |
| LAMP3                    | -0.01 (-0.08,0.06)                  | 7.90E-01            | 9.45E-01             | 0.07 (0.22,-0.08)                   | 0.05 (0.27,-0.18)                   | 0.62                            | 0.05 (0.23,-0.13)                   | 1.24 (0.99,1.55)         | 0.066               | 0.456                |
| NCR1                     | 0.06 (-0.03,0.14)                   | 1.94E-01            | 3.87E-01             | -0.42 (-0.60,-0.24)                 | -0.27 (-0.69,0.15)                  | 0.07                            | -0.30 (-0.51,-0.09)                 | 0.96 (0.80,1.17)         | 0.713               | 0.904                |
| MIC-A/B                  | 0.04 (-0.05,0.13)                   | 3.47E-01            | 5.59E-01             | -0.19 (-0.36,-0.03)                 | -0.12 (-0.40,0.15)                  | 0.23                            | -0.14 (-0.33,0.05)                  | 1.00 (0.82,1.21)         | 0.975               | 0.997                |

| Protein                              | Observational                       |                 |                 | MR-IPD                              | MR-Egger                            |                        | Weighted median                     |                          | Observational: proteins and CVD |                 |  |
|--------------------------------------|-------------------------------------|-----------------|-----------------|-------------------------------------|-------------------------------------|------------------------|-------------------------------------|--------------------------|---------------------------------|-----------------|--|
|                                      | SD difference (95% CI) <sup>1</sup> | Uncorrected     | FDR-adjusted    | SD difference (95% CI) <sup>2</sup> | SD difference (95% CI) <sup>2</sup> | <i>p</i> for intercept | SD difference (95% CI) <sup>2</sup> | HR (95% CI) <sup>3</sup> | Uncorrected                     | FDR-adjusted    |  |
|                                      |                                     | <i>p</i> -value | <i>p</i> -value |                                     |                                     |                        |                                     |                          | <i>p</i> -value                 | <i>p</i> -value |  |
| ADGRG1                               | <b>0.11 (0.03,0.20)</b>             | 9.81E-03        | 3.04E-02        | 0.02 (-0.12,0.16)                   | 0.01 (-0.18,0.21)                   | 0.88                   | 0.01 (-0.15,0.17)                   | 1.09 (0.92,1.29)         | 0.304                           | 0.761           |  |
| TIE2                                 | 0.01 (-0.07,0.09)                   | 8.18E-01        | 9.45E-01        | -0.28 (-0.45,-0.11)                 | -0.18 (-0.49,0.14)                  | 0.08                   | -0.20 (-0.39,0.00)                  | 0.88 (0.72,1.07)         | 0.203                           | 0.733           |  |
| PD-L1                                | 0.03 (-0.05,0.12)                   | 4.66E-01        | 6.76E-01        | -0.34 (-0.49,-0.18)                 | -0.21 (-0.55,0.13)                  | 0.07                   | -0.24 (-0.42,-0.06)                 | 1.16 (0.98,1.36)         | 0.082                           | 0.526           |  |
| PD-L2                                | 0.00 (-0.08,0.08)                   | 9.84E-01        | 9.93E-01        | -0.18 (-0.27,-0.09)                 | -0.11 (-0.30,0.07)                  | 0.08                   | -0.13 (-0.23,-0.03)                 | 0.95 (0.78,1.15)         | 0.615                           | 0.893           |  |
| PDCD1                                | 0.02 (-0.07,0.11)                   | 6.69E-01        | 8.75E-01        | -0.31 (-0.45,-0.17)                 | -0.20 (-0.51,0.12)                  | 0.09                   | -0.22 (-0.38,-0.06)                 | 0.97 (0.82,1.15)         | 0.708                           | 0.904           |  |
| <b><i>Extracellular proteins</i></b> |                                     |                 |                 |                                     |                                     |                        |                                     |                          |                                 |                 |  |
| Gal1                                 | <b>0.29 (0.21,0.37)</b>             | 7.51E-13        | 3.38E-11        | 0.06 (-0.07,0.19)                   | 0.04 (-0.15,0.23)                   | 0.62                   | 0.04 (-0.11,0.20)                   | 1.04 (0.83,1.29)         | 0.750                           | 0.921           |  |
| Gal9                                 | <b>0.20 (0.12,0.27)</b>             | 8.01E-07        | 1.80E-05        | 0.42 (0.28,0.56)                    | 0.27 (-0.12,0.66)                   | 0.06                   | 0.30 (0.13,0.47)                    | 1.19 (0.97,1.46)         | 0.101                           | 0.547           |  |
| DCN                                  | <b>0.14 (0.06,0.23)</b>             | 5.92E-04        | 4.10E-03        | -0.18 (-0.32,-0.05)                 | -0.12 (-0.35,0.12)                  | 0.14                   | -0.13 (-0.29,0.02)                  | 1.01 (0.84,1.22)         | 0.907                           | 0.984           |  |

<sup>1</sup> SD difference of protein biomarkers per 1-SD higher baseline BMI.

<sup>2</sup> SD difference of protein biomarkers per 1-SD higher genetically-instrumented BMI.

<sup>3</sup> HR of CVD per 1-SD higher protein biomarkers.

**eTable 8. Genetic associations of MCP1, HGF, IL18, and TRAIL with risk of CVD**

|                                   | Ischaemic stroke         | CHD                      |
|-----------------------------------|--------------------------|--------------------------|
|                                   | OR (95% CI)              | OR (95% CI)              |
| <b>MCP1</b>                       |                          |                          |
| <b>All 38 (<i>trans</i>) SNPs</b> | <b>1.08 (1.03, 1.13)</b> | <b>1.04 (0.99, 1.09)</b> |
| <b>Leave-one-out analysis</b>     |                          |                          |
| rs10145849                        | 1.08 (1.03, 1.13)        | 1.04 (0.99, 1.10)        |
| rs10744620                        | 1.08 (1.03, 1.13)        | 1.04 (0.99, 1.10)        |
| rs10888395                        | 1.08 (1.03, 1.13)        | 1.03 (0.98, 1.08)        |
| rs111995966                       | 1.08 (1.03, 1.13)        | 1.04 (0.99, 1.09)        |
| rs112313229                       | 1.08 (1.03, 1.13)        | 1.03 (0.98, 1.09)        |
| rs115936758                       | 1.08 (1.03, 1.13)        | 1.04 (0.98, 1.09)        |
| rs116425179                       | 1.08 (1.03, 1.13)        | 1.04 (0.98, 1.09)        |
| rs11710798                        | 1.08 (1.03, 1.13)        | 1.03 (0.98, 1.07)        |
| rs11720094                        | 1.08 (1.03, 1.13)        | 1.03 (0.98, 1.07)        |
| rs11926788                        | 1.08 (1.03, 1.13)        | 1.03 (0.98, 1.07)        |
| rs12047264                        | 1.08 (1.03, 1.13)        | 1.03 (0.98, 1.09)        |
| rs12073356                        | 1.09 (1.04, 1.14)        | 1.04 (0.99, 1.10)        |
| rs12727764                        | 1.08 (1.03, 1.13)        | 1.03 (0.98, 1.09)        |
| rs138591544                       | 1.09 (1.04, 1.14)        | 1.04 (0.99, 1.10)        |
| rs1386930                         | 1.07 (1.02, 1.12)        | 1.04 (0.99, 1.10)        |
| rs141676607                       | 1.08 (1.03, 1.13)        | 1.04 (0.99, 1.10)        |
| rs142043796                       | 1.07 (1.02, 1.12)        | 1.03 (0.98, 1.09)        |
| rs145155829                       | 1.07 (1.02, 1.13)        | 1.04 (0.98, 1.09)        |
| rs146522229                       | 1.07 (1.02, 1.13)        | 1.04 (0.98, 1.09)        |
| rs191688264                       | 1.08 (1.03, 1.13)        | 1.04 (0.99, 1.10)        |
| rs2036297                         | 1.07 (1.02, 1.12)        | 1.04 (0.99, 1.10)        |
| rs2281300                         | 1.08 (1.03, 1.13)        | 1.04 (0.99, 1.10)        |
| rs2712431                         | 1.07 (1.02, 1.12)        | 1.03 (0.98, 1.09)        |
| rs34190208                        | 1.07 (1.02, 1.13)        | 1.04 (0.99, 1.10)        |
| rs35060576                        | 1.07 (1.02, 1.12)        | 1.04 (0.99, 1.10)        |
| rs35333710                        | 1.07 (1.02, 1.13)        | 1.04 (0.98, 1.09)        |
| rs3774641                         | 1.07 (1.02, 1.13)        | 1.03 (0.98, 1.09)        |
| rs41338844                        | 1.07 (1.02, 1.13)        | 1.04 (0.98, 1.09)        |
| rs4682860                         | 1.08 (1.03, 1.13)        | 1.05 (0.99, 1.10)        |
| rs56212190                        | 1.08 (1.03, 1.13)        | 1.04 (0.98, 1.09)        |
| rs56300632                        | 1.07 (1.02, 1.12)        | 1.04 (0.99, 1.10)        |
| rs62242985                        | 1.08 (1.03, 1.13)        | 1.03 (0.98, 1.09)        |
| rs7019112                         | 1.08 (1.02, 1.13)        | 1.04 (0.98, 1.09)        |
| rs7197349                         | 1.07 (1.02, 1.13)        | 1.04 (0.99, 1.10)        |
| rs7519506                         | 1.09 (1.04, 1.14)        | 1.05 (1.00, 1.10)        |
| rs75265958                        | 1.08 (1.03, 1.13)        | 1.04 (0.99, 1.09)        |
| rs7527322                         | 1.08 (1.03, 1.13)        | 1.04 (0.99, 1.10)        |
| rs78629618                        | 1.08 (1.03, 1.13)        | 1.04 (0.99, 1.10)        |
| <b>HGF</b>                        |                          |                          |
| <b>2 <i>cis</i> SNPs</b>          | <b>1.02 (0.93, 1.12)</b> | <b>0.97 (0.85, 1.11)</b> |
| <b>2 <i>trans</i> SNPs*</b>       | <b>1.12 (0.99, 1.26)</b> | <b>1.07 (0.93, 1.22)</b> |
| <b>4 SNPs</b>                     | <b>1.06 (0.98, 1.14)</b> | <b>1.02 (0.93, 1.12)</b> |
| <b>Leave-one-out analysis</b>     |                          |                          |
| rs5745687                         | 1.12 (0.99, 1.26)        | 1.07 (0.91, 1.26)        |
| rs5745695                         | 1.10 (1.01, 1.20)        | 1.06 (0.96, 1.17)        |
| rs3748034                         | 1.11 (1.00, 1.23)        | 1.09 (0.96, 1.23)        |
| rs762861                          | 1.09 (0.98, 1.20)        | 1.04 (0.93, 1.17)        |

\**P*-values for heterogeneity comparing SNPs in *cis* and *trans* loci: 0.73 for ischaemic stroke, 0.88 for CHD. SNPs in *cis* loci are highlighted.

Abbreviation: CHD, coronary heart disease.

eTable 8. continued

|                               | Ischaemic stroke  | CHD               |
|-------------------------------|-------------------|-------------------|
|                               | OR (95% CI)       | OR (95% CI)       |
| <b>IL18</b>                   |                   |                   |
| <b>1 cis SNP</b>              | 1.03 (0.95, 1.12) | 1.02 (0.94, 1.12) |
| <b>5 trans SNPs*</b>          | 1.01 (0.95, 1.07) | 0.99 (0.93, 1.05) |
| <b>6 SNPs</b>                 | 1.02 (0.97, 1.07) | 1.00 (0.95, 1.05) |
| <b>Leave-one-out analysis</b> |                   |                   |
| rs71478720                    | 1.01 (0.95, 1.07) | 0.99 (0.93, 1.05) |
| rs12470143                    | 1.01 (0.96, 1.07) | 1.01 (0.95, 1.06) |
| rs141091241                   | 1.03 (0.98, 1.08) | 1.00 (0.95, 1.05) |
| rs149612950                   | 1.02 (0.97, 1.07) | 1.00 (0.95, 1.05) |
| rs449348                      | 1.02 (0.97, 1.08) | 1.01 (0.96, 1.07) |
| rs55772679                    | 1.01 (0.96, 1.07) | 0.99 (0.94, 1.05) |
| <b>TRAIL</b>                  |                   |                   |
| <b>1 cis SNP</b>              | 1.06 (0.74, 1.52) | 1.18 (0.78, 1.77) |
| <b>22 trans SNPs*</b>         | 1.00 (0.97, 1.03) | 1.03 (1.01, 1.06) |
| <b>23 SNPs</b>                | 1.00 (0.97, 1.03) | 1.03 (1.01, 1.06) |
| <b>Leave-one-out analysis</b> |                   |                   |
| rs76769120                    | 1.00 (0.97, 1.03) | 1.03 (1.00, 1.06) |
| rs11081739                    | 1.00 (0.98, 1.03) | 1.03 (1.00, 1.06) |
| rs112324482                   | 1.00 (0.97, 1.03) | 1.04 (1.01, 1.07) |
| rs112821861                   | 1.00 (0.98, 1.03) | 1.02 (0.99, 1.05) |
| rs112827182                   | 1.00 (0.97, 1.03) | 1.04 (1.01, 1.07) |
| rs117153803                   | 1.00 (0.97, 1.02) | 1.03 (1.00, 1.06) |
| rs12457501                    | 1.00 (0.97, 1.03) | 1.04 (1.01, 1.07) |
| rs12607805                    | 1.00 (0.97, 1.02) | 1.03 (1.00, 1.06) |
| rs142552223                   | 1.00 (0.97, 1.03) | 1.03 (1.00, 1.06) |
| rs2912332                     | 1.00 (0.97, 1.02) | 1.04 (1.01, 1.07) |
| rs3136596                     | 1.00 (0.97, 1.03) | 1.03 (1.00, 1.07) |
| rs60035989                    | 1.00 (0.97, 1.02) | 1.03 (1.00, 1.06) |
| rs62093482                    | 1.01 (0.98, 1.04) | 1.04 (1.01, 1.07) |
| rs62093540                    | 1.00 (0.97, 1.03) | 1.03 (1.00, 1.07) |
| rs62093947                    | 1.00 (0.97, 1.02) | 1.04 (1.01, 1.07) |
| rs6506939                     | 1.00 (0.97, 1.03) | 1.03 (1.00, 1.06) |
| rs7233927                     | 1.00 (0.97, 1.02) | 1.03 (1.00, 1.06) |
| rs72917600                    | 1.00 (0.97, 1.03) | 1.04 (1.01, 1.07) |
| rs73408359                    | 1.00 (0.97, 1.02) | 1.03 (1.00, 1.07) |
| rs74778900                    | 1.00 (0.97, 1.02) | 1.03 (1.00, 1.07) |
| rs75489499                    | 1.00 (0.97, 1.03) | 1.03 (1.00, 1.06) |
| rs79325758                    | 1.00 (0.97, 1.03) | 1.03 (1.00, 1.07) |
| rs9946486                     | 1.00 (0.97, 1.03) | 1.03 (1.00, 1.06) |

\*P-values for heterogeneity comparing SNPs on *cis* and *trans* loci: IL18: 0.70 for ischaemic stroke, 0.58 for CHD; TRAIL: 0.73 for ischaemic stroke, 0.51 for CHD.  
 SNPs on *cis* loci are highlighted.  
 Abbreviation: CHD, coronary heart disease.

**eTable 9. P-values from the MR Steiger test**

| Protein | Uncorrected $p$ -value | FDR-adjusted $p$ -value | Correct causal direction |
|---------|------------------------|-------------------------|--------------------------|
| ADA     | 8.63E-140              | 8.63E-140               | TRUE                     |
| ADGRG1  | 4.34E-162              | 5.16E-161               | TRUE                     |
| ANG1    | 1.25E-157              | 3.66E-157               | TRUE                     |
| ANGPT2  | 3.48E-161              | 3.14E-160               | TRUE                     |
| ARG1    | 1.62E-146              | 1.68E-146               | TRUE                     |
| CAIX    | 5.62E-156              | 1.26E-155               | TRUE                     |
| CASP8   | 2.78E-152              | 3.38E-152               | TRUE                     |
| CCL3    | 4.78E-153              | 6.23E-153               | TRUE                     |
| CCL4    | 2.87E-153              | 3.91E-153               | TRUE                     |
| CCL17   | 7.92E-152              | 9.26E-152               | TRUE                     |
| CCL19   | 6.07E-156              | 1.33E-155               | TRUE                     |
| CCL20   | 7.46E-159              | 2.92E-158               | TRUE                     |
| CCL23   | 3.67E-160              | 1.94E-159               | TRUE                     |
| CD4     | 4.59E-162              | 5.16E-161               | TRUE                     |
| CD5     | 1.71E-152              | 2.14E-152               | TRUE                     |
| CD8A    | 8.84E-148              | 9.25E-148               | TRUE                     |
| CD27    | 3.87E-157              | 1.05E-156               | TRUE                     |
| CD28    | 6.31E-161              | 4.74E-160               | TRUE                     |
| CD40    | 8.71E-161              | 5.60E-160               | TRUE                     |
| CD40L   | 2.68E-158              | 9.55E-158               | TRUE                     |
| CD70    | 3.21E-162              | 4.81E-161               | TRUE                     |
| CD83    | 9.50E-156              | 1.99E-155               | TRUE                     |
| CD244   | 5.59E-160              | 2.79E-159               | TRUE                     |
| CRTAM   | 1.16E-155              | 2.37E-155               | TRUE                     |
| CSF1    | 6.38E-154              | 9.27E-154               | TRUE                     |
| CX3CL1  | 4.00E-161              | 3.27E-160               | TRUE                     |
| CXCL1   | 2.42E-159              | 9.90E-159               | TRUE                     |
| CXCL5   | 1.04E-156              | 2.68E-156               | TRUE                     |
| CXCL9   | 3.26E-154              | 5.06E-154               | TRUE                     |
| CXCL10  | 1.36E-153              | 1.94E-153               | TRUE                     |
| CXCL11  | 3.12E-151              | 3.55E-151               | TRUE                     |
| CXCL12  | 3.31E-153              | 4.44E-153               | TRUE                     |
| CXCL13  | 1.90E-149              | 2.08E-149               | TRUE                     |
| DCN     | 2.93E-155              | 5.53E-155               | TRUE                     |
| EGF     | 6.91E-160              | 3.11E-159               | TRUE                     |
| FasLG   | 2.70E-154              | 4.27E-154               | TRUE                     |
| FGF2    | 4.19E-155              | 7.55E-155               | TRUE                     |
| Gal1    | 1.49E-161              | 1.49E-160               | TRUE                     |
| Gal9    | 8.41E-149              | 8.91E-149               | TRUE                     |
| GZMA    | 1.45E-145              | 1.46E-145               | TRUE                     |
| GZMB    | 2.08E-156              | 4.93E-156               | TRUE                     |
| GZMH    | 8.39E-152              | 9.68E-152               | TRUE                     |
| HGF     | 6.95E-161              | 4.81E-160               | TRUE                     |



| HO1            | 3.11E-152                                   | 3.74E-152                                    | TRUE                                |
|----------------|---------------------------------------------|----------------------------------------------|-------------------------------------|
| <b>Protein</b> | <b>Uncorrected<br/><math>p</math>-value</b> | <b>FDR-adjusted<br/><math>p</math>-value</b> | <b>Correct causal<br/>direction</b> |
| ICOSLG         | 7.01E-149                                   | 7.51E-149                                    | TRUE                                |
| IFN-beta       | 2.25E-156                                   | 5.19E-156                                    | TRUE                                |
| IFN-gamma      | 5.22E-157                                   | 1.38E-156                                    | TRUE                                |
| IL1-alpha      | 7.34E-153                                   | 9.44E-153                                    | TRUE                                |
| IL2            | 9.03E-159                                   | 3.39E-158                                    | TRUE                                |
| IL4            | 7.22E-165                                   | 2.17E-163                                    | TRUE                                |
| IL5            | 4.02E-158                                   | 1.34E-157                                    | TRUE                                |
| IL6            | 4.40E-153                                   | 5.83E-153                                    | TRUE                                |
| IL7            | 3.32E-155                                   | 6.10E-155                                    | TRUE                                |
| IL8            | 6.52E-155                                   | 1.13E-154                                    | TRUE                                |
| IL10           | 1.96E-155                                   | 3.84E-155                                    | TRUE                                |
| IL12           | 1.58E-156                                   | 3.96E-156                                    | TRUE                                |
| IL12-RB1       | 1.23E-154                                   | 2.02E-154                                    | TRUE                                |
| IL13           | 2.18E-152                                   | 2.68E-152                                    | TRUE                                |
| IL18           | 6.03E-155                                   | 1.06E-154                                    | TRUE                                |
| IL33           | 2.28E-149                                   | 2.47E-149                                    | TRUE                                |
| KLRD1          | 1.01E-154                                   | 1.69E-154                                    | TRUE                                |
| LAMP3          | 1.74E-153                                   | 2.45E-153                                    | TRUE                                |
| LAP-TGF-beta1  | 1.25E-155                                   | 2.50E-155                                    | TRUE                                |
| MCP1           | 9.77E-153                                   | 1.24E-152                                    | TRUE                                |
| MCP2           | 2.40E-153                                   | 3.32E-153                                    | TRUE                                |
| MCP3           | 3.50E-160                                   | 1.94E-159                                    | TRUE                                |
| MCP4           | 3.75E-157                                   | 1.05E-156                                    | TRUE                                |
| MIC-A/B        | 1.04E-163                                   | 2.35E-162                                    | TRUE                                |
| MMP7           | 6.32E-146                                   | 6.46E-146                                    | TRUE                                |
| MMP12          | 3.68E-154                                   | 5.52E-154                                    | TRUE                                |
| NCR1           | 6.56E-160                                   | 3.11E-159                                    | TRUE                                |
| NOS3           | 1.22E-167                                   | 9.65E-166                                    | TRUE                                |
| PD-L1          | 6.62E-152                                   | 7.83E-152                                    | TRUE                                |
| PD-L2          | 5.85E-158                                   | 1.88E-157                                    | TRUE                                |
| PDCD1          | 1.26E-157                                   | 3.66E-157                                    | TRUE                                |
| PDGF_subunit_b | 6.14E-158                                   | 1.91E-157                                    | TRUE                                |
| PGF            | 9.74E-160                                   | 4.17E-159                                    | TRUE                                |
| PTN            | 2.81E-150                                   | 3.13E-150                                    | TRUE                                |
| TIE2           | 6.82E-155                                   | 1.16E-154                                    | TRUE                                |
| TNF            | 4.39E-154                                   | 6.47E-154                                    | TRUE                                |
| TNFRSF4        | 1.70E-156                                   | 4.14E-156                                    | TRUE                                |
| TNFRSF9        | 2.76E-158                                   | 9.55E-158                                    | TRUE                                |
| TNFRSF12A      | 8.23E-163                                   | 1.48E-161                                    | TRUE                                |
| TNFRSF21       | 3.45E-154                                   | 5.27E-154                                    | TRUE                                |
| TNFSF14        | 1.74E-150                                   | 1.96E-150                                    | TRUE                                |
| TRAIL          | 2.95E-155                                   | 5.53E-155                                    | TRUE                                |
| TWEAK          | 1.22E-160                                   | 7.30E-160                                    | TRUE                                |

|                |                                       |                                        |                                     |
|----------------|---------------------------------------|----------------------------------------|-------------------------------------|
| VEGFA          | 7.04E-156                             | 1.51E-155                              | TRUE                                |
| VEGFC          | 1.26E-154                             | 2.03E-154                              | TRUE                                |
| <b>Protein</b> | <b>Uncorrected<br/><i>p</i>-value</b> | <b>FDR-adjusted<br/><i>p</i>-value</b> | <b>Correct causal<br/>direction</b> |
| VEGFR2         | 2.15E-167                             | 9.65E-166                              | TRUE                                |

**eTable 10. Randomised controlled trials of anti-inflammatory therapy in CVD**

| Drug         | Target     | Study population                                                    | Indication                                                                                  | Main findings                                                                    | PMID     |
|--------------|------------|---------------------------------------------------------------------|---------------------------------------------------------------------------------------------|----------------------------------------------------------------------------------|----------|
| Canakinumab  | IL $\beta$ | Treatment group: 6717 patients                                      | Prior AMI with CRP >2 mg/l (at least 30 days after AMI)                                     | 1) Reduction in CRP levels at 48 months                                          | 28845751 |
|              |            | Control group: 3344 patients                                        |                                                                                             | 2) Reduction in IL6 levels at 12 months                                          |          |
|              |            |                                                                     |                                                                                             | 3) Reduction in MACE (150-mg group)                                              |          |
| Anakinra     | IL1Ra      | Treatment group: 93 patients                                        | Patients with non-ST elevation acute coronary syndrome                                      | 1) Reduction in CRP levels at 7 days                                             | 25079365 |
|              |            | Control group: 89 patients                                          |                                                                                             | 2) Reduction in CRP and IL6 levels at 14 days                                    |          |
|              |            |                                                                     |                                                                                             | 3) MACE at day 30 and 3 months was similar                                       |          |
|              |            |                                                                     |                                                                                             | 4) A significant excess of MACE at 1 year in the treatment group                 |          |
| Methotrexate | IL6, TNF   | Treatment group: 2391 patients                                      | Prior MI or multi-vessel coronary disease with either type 2 diabetes or metabolic syndrome | 1) No reduction in IL1 $\beta$ , IL6, and CRP at 2.3 years                       | 30415610 |
|              |            | Control group: 2395 patients                                        |                                                                                             | 2) No reduction in MACE at 2.3 years                                             |          |
| Colchicine   | Multiple   | Treatment group: 282 patients                                       | Patients with stable CHD receiving aspirin and/or clopidogrel and statins                   | 1) Reduction in the composite incidence of ACS, out-of-hospital                  | 23265346 |
|              |            | Control group: 250 patients                                         |                                                                                             | 2) Reduction in cardiac arrest, or non-cardioembolic ischaemic stroke at 3 years |          |
| Colchicine   | Multiple   | Treatment group: 77 patients                                        | ST-segment elevation AMI                                                                    | 1) Reduction in peak CRP level                                                   | 26265659 |
|              |            | Control group: 74 patients                                          |                                                                                             | 2) Reduction in infarction size at 6-9 days                                      |          |
| Colchicine   | Multiple   | Treatment group: 2366 patients<br>Control group: 2379 patients      | Patients within 30 days after a MI                                                          | Reduction in ischaemic cardiovascular events                                     | 31733140 |
| Tocilizumab  | IL6R       | Tocilizumab group: 1538 patients<br>Etanercept group: 1542 patients | Moderate to severe rheumatoid arthritis                                                     | No difference in MACE at 4.9 years                                               | 31469238 |

Abbreviations: MACE, major adverse cardiovascular event (a composite of non-fatal myocardial infarction, nonfatal stroke, or cardiovascular death); AMI, acute myocardial infarction.

**eTable 11. Observational associations between BMI and proteins in CKB and the INTERVAL study\***

| Protein | INTERVAL                                                   | CKB                                                        |
|---------|------------------------------------------------------------|------------------------------------------------------------|
|         | Effect size (95% CI)<br>per 1 kg/m <sup>2</sup> higher BMI | Effect size (95% CI)<br>per 1 kg/m <sup>2</sup> higher BMI |
| IL6     | 0.027 (0.020, 0.035)                                       | 0.051 (0.030, 0.072)                                       |
| CCL3    | 0.032 (0.025, 0.040)                                       | 0.019 (0.005, 0.034)                                       |
| CCL19   | 0.026 (0.018, 0.033)                                       | 0.044 (0.024, 0.064)                                       |
| CXCL10  | 0.018 (0.011, 0.026)                                       | 0.035 (0.015, 0.055)                                       |
| MCP1    | -0.012 (-0.0020, 0.0003)                                   | 0.018 (0.005, 0.030)                                       |
| MCP3    | 0.006 (0.0001, 0.014)                                      | 0.015 (0.006, 0.025)                                       |
| TNFSF14 | 0.017 (0.009, 0.024)                                       | 0.040 (0.028, 0.053)                                       |
| TWEAK   | -0.015 (-0.0023, -0.0008)                                  | -0.013 (-0.021, -0.006)                                    |
| HGF     | 0.048 (0.040, 0.055)                                       | 0.038 (0.029, 0.047)                                       |
| PGF     | 0.019 (0.012, 0.027)                                       | 0.015 (0.006, 0.023)                                       |
| VEGFA   | 0.003 (-0.005, 0.010)                                      | 0.024 (0.014, 0.034)                                       |
| VEGFR2  | 0.015 (0.008, 0.022)                                       | 0.009 (0.003, 0.016)                                       |
| DCN     | -0.005 (-0.012, 0.003)                                     | 0.011 (0.005, 0.017)                                       |
| Gal1    | -0.004 (-0.012, 0.003)                                     | 0.021 (0.015, 0.027)                                       |

\* Protein values were rank-inverse normalised before performing linear regression of protein biomarkers on BMI. Estimates in the INTERVAL study adjusted for age and sex. Estimates in CKB adjusted for age, age squared, sex, region, smoking, alcohol, education, household income, self-rated health, systolic blood pressure, diabetes, statin treatment, prior kidney disease, and fasting time. The SomaScan assay was used in the INTERVAL study (Sun BB, Maranville JC, Peters JE, Stacey D, Staley JR, Blackshaw J, et al. Genomic atlas of the human plasma proteome. *Nature*. 2018;558(7708):73-79).

## 1 **eMethods**

### 2 **Assessment of adiposity**

3 All anthropometric measurements were taken by trained technicians while participants  
4 were wearing light clothes and no shoes, usually to the nearest 0.1 cm or 0.1 kg. Standing  
5 height and sitting height were measured using a stadiometer. Sitting height was measured  
6 as the length of the body from buttocks to the crown of the head. Weight was measured  
7 using a body composition analyser (TANITA-TBF-300GS; Tanita Corporation), with  
8 subtraction of weight of clothing according to season (ranging from 0.5 kg in summer to  
9 2.0-2.5 kg in winter). Waist circumference (WC) and hip circumference (HC) were  
10 measured using a soft non-stretchable tape, with HC measured at the maximum  
11 circumference around the buttocks. Body mass index (BMI) was calculated as the  
12 measured weight in kilograms divided by the square of the measured height in metres.  
13 BMI at 25 years (BMI<sub>25</sub>) was calculated using the recalled weight at age 25 years and the  
14 measured height at baseline. Waist-to-hip ratio (WHR) was the ratio of WC to HC. Percent  
15 body fat (%BF) was the fraction of total weight that was estimated to be fat weight by the  
16 Tanita body composition analyser using proprietary algorithms. Other derived measures of  
17 adiposity included fat mass (the product of %BF and body weight), lean mass (the  
18 subtraction of fat mass from body weight), waist-height ratio (WC divided by height), and  
19 leg length (the subtraction of sitting height from standing height).

### 20 **OLINK proteomics**

21 Details of the OLINK assay have been reported elsewhere, including measurements of  
22 assay performance and validation.<sup>1,2</sup> Briefly, a 96-well microplate format is used, including  
23 88 samples and eight external quality control standards (two pooled plasma controls, three  
24 blank samples used to set the LOD and three inter-plate controls used for normalization).  
25 Each sample is mixed with oligonucleotide-labelled antibodies and four internal controls.

26 When both high-specificity antibodies bind the target protein in the sample, the attached  
27 oligonucleotides form a unique DNA reporter sequence that is subsequently amplified and  
28 quantified by quantitative polymerase chain reaction (qPCR). qPCR data are pre-  
29 processed to generate NPX values.

30 In addition, eight external controls were ran on every plate (**eFigure 19**).<sup>3,4</sup> External  
31 controls were added as follows. First, a pooled plasma sample containing the 92 proteins  
32 (inter-plate control, same design as the extension control) was run in triplicate in each  
33 plate to monitor inter-plate variability and for normalization. Second, negative controls (i.e.  
34 negative buffer samples) were run in triplicate in each plate. The background signal was  
35 used to calculate the limit of detection (LOD) for each protein. The LOD was calculated as  
36 the mean of 3 negative controls plus 3SD. Fixed SDs were calculated during validation of  
37 OLINK panels and probe lots and were based on runs of negative controls (at least 36  
38 replicates). For multi-plate studies, the maximum observed LOD for each assay is chosen  
39 and reported as the study LOD. Third, a pooled plasma sample was run in duplicate in  
40 each plate to calculate intra- and inter-assay %CV. The %CV was calculated on linear  
41 NPX values ( $2^{NPX}$ ). Intra- and inter-assay CV were reported for each assay.

42 **eFigure 19. Internal and external controls**

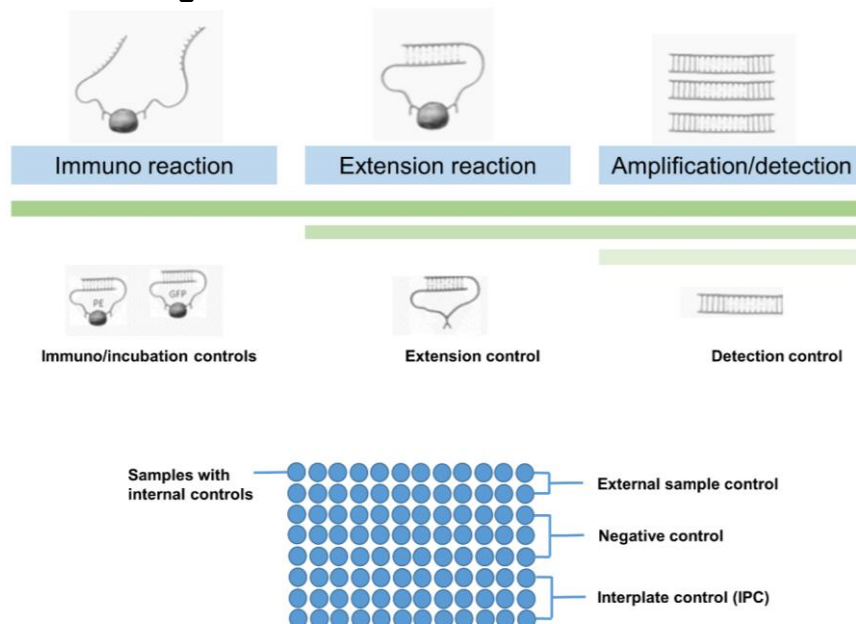

43  
44 \* Adapted from OLINK validation document.<sup>3,4</sup>

45 The specificity of the OLINK assays has been described in the validation document.<sup>3</sup> For  
46 each protein target, two oligonucleotide-coupled antibodies (PEA probes) must bind in  
47 close enough proximity to enable the oligos to hybridize and form a unique DNA template  
48 for detection by qPCR. The 92-antibody pairs selected in the Immuno-Oncology panel  
49 have been evaluated against 92-panel specific proteins as well as an additional 107  
50 proteins. These 107 proteins were selected from a library of protein biomarkers included in  
51 other OLINK panels (e.g. inflammation panel). This was done by creating a pool of  
52 antigens, which was incubated across all 92-antibody protein pairs for the panel. Only if  
53 there was a correct match would a reporter sequence be created and serve as a template  
54 for subsequent real-time qPCR. Ten sub-pools of antigen were evaluated to cover the 92  
55 assays in the OLINK panel as illustrated in the validation document.<sup>3</sup>

56 **eFigure 20. Assay specificity**

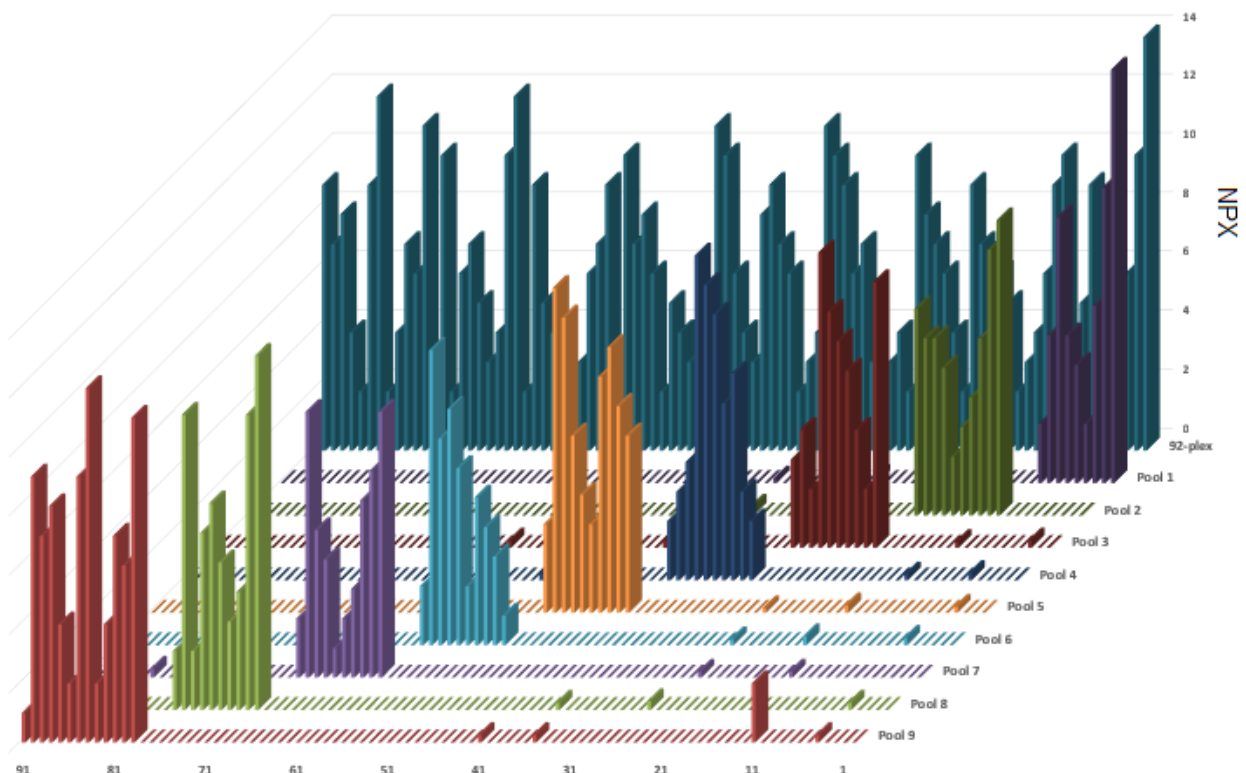

57 \* Values in this figure are for illustration purpose and do not show the actual values reported in the OLINK validation  
58 studies.<sup>3</sup>  
59  
60

61

## 62 **Statistical analysis**

### 63 *Observational analyses*

64 In observational analysis involving 628 participants, linear regression was used to assess  
65 the associations of adiposity with protein markers, adjusted for age at baseline, age  
66 squared, sex, area (10 regions), education (6 groups: no formal school, primary school,  
67 middle school, high school, technical school/college, or university), household income (6  
68 groups: <2500, 2500-4999, 5000-9999, 10,000-19,999, 20,000-34,999, or ≥35,000 RMB),  
69 alcohol (6 groups: abstainers, ex-weekly drinkers, reduced-intake drinkers, occasional  
70 drinkers, and among weekly drinkers, <20 or ≥20 g/day [women], <30 or ≥30 g/day [men]),  
71 self-rated health (3 groups: poor, fair, and good), systolic blood pressure (SBP,  
72 continuous), diabetes, statin treatment (3 groups: no CVD, CVD on statin treatment, and  
73 CVD not on statin treatment), prior kidney disease (yes or no), and fasting time  
74 (continuous). Statin treatment was assessed among patients with prior CVD at baseline.  
75 Prior kidney disease was assessed by the question “Has a doctor ever told you that you  
76 had had kidney disease?”. In prospective analyses of associations of protein levels with  
77 risk of CVD, Cox proportional hazards models were used to estimate hazard ratios (HRs)  
78 of vascular disease per 1-SD higher protein markers, adjusted for the same variables as in  
79 the analysis of adiposity and protein markers.

80 In prospective analyses of associations of protein levels with risk of CVD, Cox proportional  
81 hazards models were used to estimate hazard ratios (HRs) of vascular disease per 1-SD  
82 higher protein markers, adjusted for the same variables as in the analysis of adiposity and  
83 protein markers. To estimate the extent to which additional adjustment for protein  
84 biomarkers might influence the observational association of BMI with CVD (as an  
85 approximation to the quantification of potential mediation), we extended the base model to  
86 include proteins associated with both BMI and CVD risk and examined the percent change



87 in the log HRs per 1-SD higher BMI. The proportional change in CVD logHR associated  
88 with high BMI due to additional adjustment for protein biomarkers was calculated as  
89 follows:  $((\log\text{HR}_{\text{basic model}} - \log\text{HR}_{\text{adjusted model}}) / (\log\text{HR}_{\text{basic model}})) \times 100\%$ .

90 We used the following approach to account for multiple comparisons. Significance was  
91 assessed at 5% false discovery rate (FDR)<sup>5</sup> in the observational analysis of BMI with  
92 protein biomarkers. Unadjusted *p*-values are reported for the genetic associations of BMI  
93 with protein biomarkers and for the observational associations of protein biomarkers with  
94 vascular events to avoid over-correction. The Mendelian randomization-derived effects of  
95 BMI on protein biomarkers were compared with the corresponding observational  
96 associations using Cochran's Q test (with significance assessed at 5% FDR). In addition,  
97 we used a method based on the Rényi decomposition as an alternative approach to  
98 visualise multiple comparisons for the observational associations of BMI with proteins and  
99 of proteins with vascular events. The isolation of protein biomarkers in the Rényi plot  
100 above the line of unit slope suggests presence of significant associations taking into  
101 account multiple testing.<sup>6</sup>

102 Subgroup analyses of the observational associations were conducted by sex, region  
103 (urban vs rural), smoking (ever vs never), physical activity (<21 vs ≥21 MET-h/day  
104 [median]), RPG (<5.6 vs ≥5.6 mmol/L [median]), and hypertension status (yes vs no).  
105 Hypertension was defined as: (i) previous diagnosis of hypertension; (ii) SBP ≥140 mmHg  
106 and DBP ≥90 mmHg; or, (iii) currently on anti-hypertensive medication.

### 107 *Mendelian randomisation*

108 Several sensitivity analyses were conducted for Mendelian randomisation analysis. First,  
109 we used MR-Egger and weighted median methods to explore whether our finding depends  
110 on the assumption that all the variants have no horizontal pleiotropic effects (i.e. the  
111 effects of BMI variants on multiple biological pathways). The MR-Egger method is a

112 statistical approach that allows one or more genetic variants to have pleiotropic effects,  
113 while the weighted median estimator can give valid estimates even in the presence of  
114 horizontal pleiotropy as long as at least half the genetic variants have no pleiotropic  
115 effects. The weighted median estimator retains greater precision in the estimates than MR-  
116 Egger (owing to a power penalty). Second, the genetic associations of BMI with  
117 proteomics were compared across different BMI scores (i.e. unweighted score and  
118 externally weighted scores using (a) weights from Biobank Japan and (b) meta-analysis of  
119 UKB and GIANT. Third, the associations of genetically-predicted BMI with protein  
120 biomarkers was also assessed by two-sample Mendelian randomisation using GWAS  
121 summary statistics from the GWAS of BMI in BBJ (i.e. SNP-BMI) together with summary-  
122 specific estimates in CKB (i.e. SNP-proteins). The derivation of the summary estimates in  
123 CKB used the same adjustment as the individual participant-level data (IPD) analysis.  
124 Inverse-variance weighted (IVW) analysis was performed by linear regression of the SNP-  
125 protein associations on the SNP-BMI associations. Fourth, the MR Steiger test was used  
126 to elucidate whether the assumption that the exposure causes the outcome is valid by  
127 testing whether the correlation of BMI SNPs in each protein biomarker was less than the  
128 correlation with BMI (**eTable 9**).<sup>7</sup> Fifth, we excluded from the unweighted score SNPs  
129 within 1M bp of the gene or genes encoding protein biomarkers.

### 130 *Meta-analysis and two-sample Mendelian randomisation*

131 In order to maximise sample size, we meta-analysed using fixed effect models (1) causal  
132 estimates between BMI and protein biomarkers with those reported by or calculated from  
133 previous studies (Analysis 1) and (2) our observational estimates between protein  
134 biomarkers and incident CVD with previous prospective studies (Analysis 2). Protein  
135 biomarkers were selected for exploration of causal effects if there were causal  
136 associations of BMI with proteins in CKB and available GWAS for these proteins (seven  
137 proteins: IL6, IL18, MCP1, MCP3, TRAIL, TWEAK, and HGF). We conducted two-sample

138 Mendelian randomisation analysis to estimate the causal associations of protein with CVD  
139 (Analysis 3). IL6, MCP1, and MCP3 were excluded from this analysis because no  
140 instruments were available. Instruments for protein biomarkers were extracted from four  
141 proteomics GWAS and a literature search in GWAS catalogue using the  $p$ -value threshold  
142 in the original studies (**eTable 12** on page 75-78, Supplement).<sup>8-11</sup> SNPs were included if  
143 they were not in linkage disequilibrium ( $r^2 < 0.01$  in CEU) with one another and were in *cis*  
144 to the locus of interest ( $\pm 300$  kbp). *Trans* associated variants were also included as a  
145 sensitivity analysis. Selection criteria, data sources, and calculations are reported in  
146 **eTable 13** (on page 79, Supplement). In addition to CVD, we conducted two-sample  
147 Mendelian randomisation analysis to estimate the genetic association between IL18 and  
148 type 2 diabetes using summary-level statistics reported by DIAGRAM (34,840 cases and  
149 114,981 controls).<sup>12</sup> We selected type 2 diabetes because a previous RCT suggested that  
150 IL18 might be a potential drug target.<sup>13</sup> As only one *cis*-pQTL was identified for IL18  
151 (**eTable 12** on page 75-78, Supplement), the genetic association between IL18 and type 2  
152 diabetes was calculated using the Wald ratio.

### 153 *Colocalisation analysis*

154 Colocalisation analysis was conducted for protein biomarkers for which we found some  
155 evidence of genetic association with CVD (i.e. TWEAK, HGF, and ischaemic stroke), using  
156 SNPs within 2kb of the protein-encoding locus and GWAS summary statistics for  
157 ischaemic stroke from MEGASTROKE in CEU.<sup>14</sup> For TWEAK and HGF, GWAS summary  
158 statistics were obtained from the INTERVAL study (in CEU).<sup>10</sup> We used the R package  
159 “coloc” to perform genetic colocalization analysis of two potentially related phenotypes and  
160 to assess whether they share common genetic causal variant(s) in a given region.<sup>15</sup>  
161 Because summary-level data was used, approximate Bayes factor (ABF) colocalisation  
162 analyses were conducted. Posterior probabilities of the following hypotheses were  
163 calculated: H0: neither trait has a genetic association in the region; H1: only trait 1 has a

164 genetic association in the region; H2: only trait 2 has a genetic association in the region;  
165 H3: both traits are associated, but with different causal variants; H4: both traits are  
166 associated and share a single causal variant.<sup>15</sup> When visualising colocalisation analysis  
167 (using the R package “locuscomparer”), the *cis*-SNP with the smallest *p*-value was  
168 selected as the lead SNP.

## 169 **References:**

- 170 1. Lundberg M, Thorsen SB, Assarsson E, Villablanca A, Tran B, Gee N, et al. Multiplexed  
171 homogeneous proximity ligation assays for high-throughput protein biomarker research in  
172 serological material. *Mol Cell Proteomics*. 2011;10(4):M110004978.  
173 doi:10.1074/mcp.M110.004978.
- 174 2. Assarsson E, Lundberg M, Holmquist G, Bjorkestén J, Thorsen SB, Ekman D, et al.  
175 Homogenous 96-plex PEA immunoassay exhibiting high sensitivity, specificity, and  
176 excellent scalability. *PLoS One*. 2014;9(4):e95192. doi:10.1371/journal.pone.0095192.
- 177 3. OLINK validation document for the Immuno-Oncology panel (article number 95310).  
178 Available at: <https://www.olink.com/resources-support/document-download-center/>  
179 (assessed 2018 December; the original document can only be available by contacting  
180 OLINK directly)
- 181 4. OLINK FAQs: how is quality control of the data performed? Available at:  
182 <https://www.olink.com/question/how-is-quality-control-of-the-data-performed/> (assessed  
183 2020 May)
- 184 5. Benjamini YH. Controlling the false discovery rate: a practical and powerful approach to  
185 multiple testing. *Journal of the Royal Statistical Society Series B (Methodological)*.  
186 1995:289-300
- 187 6. Cox DR, Kartsonaki C. On the analysis of large numbers of *p*-values. *International*  
188 *Statistical Review*. 2019;87(3):505-513
- 189 7. Hemani G, Tilling K, and Davey Smith G. Orienting the causal relationship between  
190 imprecisely measured traits using GWAS summary data. *PLoS Genet*. 2017;13(11):  
191 e1007081. doi:1371/journal.pgen.1007081.
- 192 8. Ahola-Olli AV, Wurtz P, Havulinna AS, Aalto K, Pitkanen N, Lehtimäki T, et al. Genome-  
193 wide association study identifies 27 loci influencing concentrations of circulating cytokines  
194 and growth factors. *Am J Hum Genet*. 2017;100(1):40-50.
- 195 9. Folkersen L, Fauman E, Sabater-Lleal M, Strawbridge RJ, Franberg M, Sennblad B, et  
196 al. Mapping of 79 loci for 83 plasma protein biomarkers in cardiovascular disease. *PLoS*  
197 *Genet*. 2017;13(4):e1006706. doi:10.1371/journal.pgen.1006706.
- 198 10. Sun BB, Maranville JC, Peters JE, Stacey D, Staley JR, Blackshaw J, et al. Genomic  
199 atlas of the human plasma proteome. *Nature*. 2018;558(7708):73-79.
- 200 11. Chong M, Sjaarda J, Pigeyre M, Mohammadi-Shemirani P, Lali R, Shoamanesh A, et  
201 al. Novel drug targets for ischemic stroke identified through Mendelian randomization  
202 analysis of the blood proteome. *Circulation*. 2019;140(10):819-830.

- 203 12. Morris AP, Voight BF, Teslovich TM, Ferreira T, Segre AV, Steinthorsdottir, et al.  
204 Large-scale association analysis provides insights into the genetic architecture and  
205 pathophysiology of type 2 diabetes. *Nat Genet.* 2012;44(9):981-90.
- 206 13. McKie EA, Reid JL, Mistry PC, DeWall SL, Abberley L, Ambery PD, et al. A study to  
207 investigate the efficacy and safety of an anti-interleukin-18 monoclonal antibody in the  
208 treatment of type 2 diabetes mellitus. *PLoS One.* 2016;11:e0150018. doi:  
209 10.1371/journal.pone.0150018.
- 210 14. Malik R, Chauhan G, Traylor M, Sargurupremraj M, Okada Y, Mishra A, et al.  
211 Multiancestry genome-wide association study of 520,000 subjects identifies 32 loci  
212 associated with stroke and stroke subtypes. *Nat Genet.* 2018;50(4):524-537.
- 213 15. Giambartolomei C. et al. Bayesian test for colocalisation between pairs of genetic  
214 association studies using summary statistics. *PLoS Genet.* 2014;10:e1004383.  
215 doi:10.1371/journal.pgen.1004383.
- 216 16. CARDIoGRAMplusC4D Consortium, M Nikpey, A Goel, H Won, LM Hall C. Willenborg,  
217 S Kanoni, D Saleheen et al. A comprehensive 1000 Genomes–based genome-wide  
218 association meta-analysis of coronary artery disease. *Nat Genet.* 2015;47(10):1121-1130.
- 219 17. Yengo L, Sidorenko J, Kemper KE, Zheng Z, Wood AR, Weedon MN, et al. Meta-  
220 analysis of genome-wide association studies for height and body mass index in ~700,000  
221 individuals of European ancestry. *Hum Mol Genet.* 2018;27(20):3641-3649.  
222

**eTable 12. SNPs that were used as instruments for selected protein biomarkers**

| PMID               | Protein | SNP         | Position  | Chr | Locus   | Effect allele | Other allele | Effect size* | SE     | p-value  |
|--------------------|---------|-------------|-----------|-----|---------|---------------|--------------|--------------|--------|----------|
| 27989323           | HGF     | rs5745687   | 81359051  | 7   | HGF     | C             | T            | 0.307        | 0.041  | 2.75E-14 |
| 29875488           | HGF     | rs5745695   | 81358075  | 7   | HGF     | A             | G            | 0.19         | 0.03   | 0.5481   |
| 27989323           | HGF     | rs3748034   | 3446091   | 4   | HGFAC   | T             | G            | -0.15        | 0.023  | 1.81E-10 |
| 27989323           | HGF     | rs762861    | 3442011   | 4   | HGFAC   | C             | G            | -0.108       | 0.019  | 1.56E-08 |
| 27989323           | IL18    | rs711478720 | 112009605 | 11  | IL18    | C             | T            | 0.2669       | 0.0276 | 3.71E-22 |
| 27989323           | IL18    | rs12470143  | 31763558  | 2   | unknown | C             | T            | -0.1496      | 0.0235 | 2.12E-10 |
| 27989323           | IL18    | rs141091241 | 112111460 | 11  | unknown | C             | T            | 0.4122       | 0.0728 | 1.83E-08 |
| 27989323           | IL18    | rs149612950 | 68166499  | 5   | unknown | G             | A            | -0.505       | 0.0906 | 2.54E-08 |
| 27989323           | IL18    | rs449348    | 32499150  | 2   | unknown | G             | A            | -0.1371      | 0.0243 | 1.90E-08 |
| 27989323           | IL18    | rs55772679  | 112235908 | 11  | unknown | C             | T            | 0.1393       | 0.024  | 6.86E-09 |
| 29875488, 31208196 | TWEAK   | rs11078691  | 7424935   | 17  | TWEAK   | T             | C            | 0.13         | 0.033  | 0.016408 |
| 29875488, 31208196 | TWEAK   | rs117646332 | 7656668   | 17  | TWEAK   | A             | G            | 0.316        | 0.05   | 8.03E-05 |
| 29875488, 31208196 | TWEAK   | rs118081933 | 7606211   | 17  | TWEAK   | A             | G            | -0.273       | 0.092  | 0.081268 |
| 29875488, 31208196 | TWEAK   | rs12451505  | 7625888   | 17  | TWEAK   | C             | G            | 0.15         | 0.028  | 0.000785 |
| 29875488, 31208196 | TWEAK   | rs12937133  | 7289042   | 17  | TWEAK   | T             | C            | 0.083        | 0.026  | 0.056135 |
| 29875488, 31208196 | TWEAK   | rs12941509  | 7448288   | 17  | TWEAK   | G             | C            | 0.393        | 0.027  | 7.44E-22 |
| 29875488, 31208196 | TWEAK   | rs150836621 | 7516177   | 17  | TWEAK   | T             | G            | 0.183        | 0.033  | 0.794534 |
| 29875488, 31208196 | TWEAK   | rs1614984   | 7571452   | 17  | TWEAK   | A             | G            | 0.188        | 0.025  | 1.78E-06 |
| 29875488, 31208196 | TWEAK   | rs1641511   | 7559677   | 17  | TWEAK   | A             | G            | 0.26         | 0.029  | 1.16E-08 |
| 29875488, 31208196 | TWEAK   | rs181975550 | 7595379   | 17  | TWEAK   | T             | C            | -0.424       | 0.075  | 0.000418 |
| 29875488, 31208196 | TWEAK   | rs2078486   | 7583083   | 17  | TWEAK   | A             | G            | -0.074       | 0.049  | 0.410656 |
| 29875488, 31208196 | TWEAK   | rs33989543  | 7324788   | 17  | TWEAK   | A             | G            | -0.146       | 0.048  | 0.070651 |
| 29875488, 31208196 | TWEAK   | rs3803802   | 7621464   | 17  | TWEAK   | A             | C            | -0.146       | 0.025  | 0.000277 |
| 29875488, 31208196 | TWEAK   | rs56206519  | 7303143   | 17  | TWEAK   | A             | G            | 0.081        | 0.025  | 0.057269 |
| 29875488, 31208196 | TWEAK   | rs56332843  | 7647537   | 17  | TWEAK   | A             | G            | -0.161       | 0.039  | 0.011796 |
| 29875488, 31208196 | TWEAK   | rs62062613  | 7642035   | 17  | TWEAK   | T             | C            | -0.137       | 0.038  | 0.027598 |
| 29875488, 31208196 | TWEAK   | rs6503016   | 7259073   | 17  | TWEAK   | T             | C            | 0.077        | 0.026  | 0.076536 |

| 29875488, 31208196 | TWEAK   | rs6608      | 7464413   | 17  | TWEAK                 | T             | C            | -0.349       | 0.032  | 1.74E-12 |
|--------------------|---------|-------------|-----------|-----|-----------------------|---------------|--------------|--------------|--------|----------|
| PMID               | Protein | SNP         | Position  | Chr | Locus                 | Effect allele | Other allele | Effect size* | SE     | p-value  |
| 29875488, 31208196 | TWEAK   | rs72842814  | 7314137   | 17  | TWEAK                 | A             | G            | -0.382       | 0.076  | 0.001873 |
| 29875488, 31208196 | TWEAK   | rs9906416   | 7344263   | 17  | TWEAK                 | T             | C            | -0.253       | 0.03   | 4.91E-08 |
| 28369058           | TRAIL   | rs76769120  | 12243825  | 1   | TRAIL                 | G             | C            | 0.42         | 0.001  | 7E-14    |
| 27989323           | TRAIL   | rs11081739  | 29583126  | 18  | unknown               | G             | A            | -0.1411      | 0.0202 | 3.34E-12 |
| 27989323           | TRAIL   | rs112324482 | 29534956  | 18  | unknown               | G             | A            | -0.1039      | 0.0174 | 2.21E-09 |
| 27989323           | TRAIL   | rs112821861 | 29569386  | 18  | unknown               | G             | T            | 0.8518       | 0.0496 | 4.90E-68 |
| 27989323           | TRAIL   | rs112827182 | 171992068 | 3   | unknown               | G             | A            | -0.3025      | 0.041  | 2.88E-13 |
| 27989323           | TRAIL   | rs117153803 | 28735908  | 18  | unknown               | G             | T            | -0.1736      | 0.0295 | 4.90E-09 |
| 27989323           | TRAIL   | rs12457501  | 29836551  | 18  | unknown               | C             | T            | -0.2019      | 0.0273 | 1.44E-13 |
| 27989323           | TRAIL   | rs12607805  | 29117455  | 18  | unknown               | G             | A            | 0.174        | 0.0254 | 8.20E-12 |
| 27989323           | TRAIL   | rs142552223 | 172234017 | 3   | unknown               | G             | A            | 0.3823       | 0.0379 | 5.77E-24 |
| 27989323           | TRAIL   | rs2912332   | 28892506  | 18  | unknown               | G             | A            | 0.2139       | 0.026  | 1.47E-16 |
| 27989323           | TRAIL   | rs3136596   | 172228872 | 3   | unknown               | G             | A            | -0.1147      | 0.0209 | 3.65E-08 |
| 27989323           | TRAIL   | rs60035989  | 29231813  | 18  | unknown               | C             | A            | -0.1062      | 0.0186 | 1.02E-08 |
| 27989323           | TRAIL   | rs62093482  | 29178899  | 18  | unknown               | C             | T            | -0.9987      | 0.0532 | 7.10E-78 |
| 27989323           | TRAIL   | rs62093540  | 29316653  | 18  | unknown               | C             | T            | -0.2919      | 0.0289 | 6.82E-24 |
| 27989323           | TRAIL   | rs62093947  | 29660305  | 18  | unknown               | C             | T            | 0.7596       | 0.046  | 3.31E-61 |
| 27989323           | TRAIL   | rs6506939   | 29312725  | 18  | unknown               | C             | T            | -0.0927      | 0.0169 | 4.17E-08 |
| 27989323           | TRAIL   | rs7233927   | 29778804  | 18  | unknown               | G             | A            | -0.0913      | 0.0165 | 2.86E-08 |
| 27989323           | TRAIL   | rs72917600  | 27859593  | 18  | unknown               | C             | A            | -0.2458      | 0.0378 | 4.79E-11 |
| 27989323           | TRAIL   | rs73408359  | 28927298  | 18  | unknown               | C             | T            | -0.411       | 0.0365 | 2.55E-29 |
| 27989323           | TRAIL   | rs74778900  | 28086266  | 18  | AC115100.1,AC090506.1 | C             | T            | -0.5906      | 0.0532 | 2.59E-28 |
| 27989323           | TRAIL   | rs75489499  | 172503541 | 3   | unknown               | C             | T            | 0.2052       | 0.0348 | 3.39E-09 |
| 27989323           | TRAIL   | rs79325758  | 28029396  | 18  | unknown               | C             | T            | -0.3632      | 0.0483 | 1.30E-13 |
| 27989323           | TRAIL   | rs9946486   | 28795414  | 18  | unknown               | G             | A            | -0.1798      | 0.0246 | 3.02E-13 |
| 27989323           | MCP1    | rs10145849  | 82941991  | 14  | SEL1L                 | G             | A            | 0.076        | 0.016  | 3.41E-06 |
| 27989323           | MCP1    | rs10744620  | 3739094   | 12  | EFCAB4B               | C             | T            | -0.079       | 0.016  | 9.91E-07 |
| 27989323           | MCP1    | rs10888395  | 150762171 | 1   | CTSK                  | C             | T            | 0.081        | 0.016  | 5.98E-07 |

| 27989323 | MCP1    | rs111995966 | 109174969 | 2   | LIMS1        | G             | T            | -0.145       | 0.031 | 2.53E-06 |
|----------|---------|-------------|-----------|-----|--------------|---------------|--------------|--------------|-------|----------|
| 27989323 | MCP1    | rs112313229 | 46364860  | 3   | CCR2         | G             | A            | 0.165        | 0.031 | 1.43E-07 |
| PMID     | Protein | SNP         | Position  | Chr | Locus        | Effect allele | Other allele | Effect size* | SE    | p-value  |
| 27989323 | MCP1    | rs115936758 | 159170343 | 1   | LOC100131825 | C             | T            | 0.178        | 0.035 | 5.74E-07 |
| 27989323 | MCP1    | rs116425179 | 45598703  | 3   | LARS2        | G             | A            | 0.148        | 0.026 | 5.68E-09 |
| 27989323 | MCP1    | rs11710798  | 48570686  | 3   | PFKFB4       | C             | A            | -0.092       | 0.02  | 2.87E-06 |
| 27989323 | MCP1    | rs11720094  | 46559911  | 3   | LRRC2        | G             | C            | 0.106        | 0.016 | 1.54E-11 |
| 27989323 | MCP1    | rs11926788  | 42623498  | 3   | SEC22C       | G             | C            | 0.189        | 0.036 | 2.06E-07 |
| 27989323 | MCP1    | rs12047264  | 159535626 | 1   | APCS         | G             | A            | 0.093        | 0.019 | 1.87E-06 |
| 27989323 | MCP1    | rs12073356  | 208007848 | 1   | LOC148696    | G             | A            | 0.143        | 0.031 | 4.17E-06 |
| 27989323 | MCP1    | rs12727764  | 158982477 | 1   | IFI16        | G             | T            | -0.097       | 0.021 | 5.02E-06 |
| 27989323 | MCP1    | rs138591554 | 46289206  | 3   | CCR3         | T             | A            | 0.317        | 0.033 | 7.94E-22 |
| 27989323 | MCP1    | rs1386930   | 45884003  | 3   | LZTFL1       | C             | T            | -0.09        | 0.016 | 7.86E-09 |
| 27989323 | MCP1    | rs141676607 | 46653244  | 3   | LOC100132146 | C             | T            | -0.313       | 0.064 | 9.48E-07 |
| 27989323 | MCP1    | rs142043796 | 46679831  | 3   | LOC100132146 | G             | C            | 0.241        | 0.049 | 8.30E-07 |
| 27989323 | MCP1    | rs145155829 | 44165646  | 1   | KDM4A        | C             | T            | 0.215        | 0.046 | 3.72E-06 |
| 27989323 | MCP1    | rs146522229 | 47798480  | 19  | C5AR1        | C             | T            | 0.598        | 0.118 | 3.56E-07 |
| 27989323 | MCP1    | rs191688264 | 30745361  | 22  | SF3A1        | C             | A            | 0.483        | 0.099 | 1.10E-06 |
| 27989323 | MCP1    | rs2036297   | 46172903  | 3   | CCR1         | G             | A            | -0.119       | 0.016 | 1.09E-13 |
| 27989323 | MCP1    | rs2281300   | 159156285 | 1   | CADM3        | C             | T            | 0.089        | 0.017 | 1.71E-07 |
| 27989323 | MCP1    | rs2712431   | 128316890 | 3   | RPN1         | C             | A            | 0.079        | 0.017 | 4.76E-06 |
| 27989323 | MCP1    | rs34190208  | 46736217  | 3   | ALS2CL       | C             | T            | -0.108       | 0.022 | 9.91E-07 |
| 27989323 | MCP1    | rs35060576  | 46434525  | 3   | CCRL2        | G             | A            | -0.096       | 0.016 | 3.79E-09 |
| 27989323 | MCP1    | rs35333710  | 159172854 | 1   | CADM3        | G             | A            | -0.148       | 0.027 | 3.71E-08 |
| 27989323 | MCP1    | rs3774641   | 45937833  | 3   | CCR9         | G             | T            | -0.132       | 0.019 | 5.04E-12 |
| 27989323 | MCP1    | rs41338844  | 46272951  | 3   | CCR3         | G             | A            | -0.22        | 0.046 | 3.22E-06 |
| 27989323 | MCP1    | rs4682860   | 42863804  | 3   | CCBP2        | G             | A            | -0.081       | 0.016 | 2.31E-07 |
| 27989323 | MCP1    | rs56212190  | 42168539  | 1   | HIVEP3       | C             | T            | -0.181       | 0.037 | 9.85E-07 |
| 27989323 | MCP1    | rs56300632  | 4.27E+07  | 3   | NKTR         | G             | A            | -0.077       | 0.017 | 3.04E-06 |
| 27989323 | MCP1    | rs62242985  | 46385638  | 3   | CCR2         | G             | A            | 0.101        | 0.016 | 5.54E-10 |



|             |                |            |                 |            |              |                      |                     |                     |           |                |
|-------------|----------------|------------|-----------------|------------|--------------|----------------------|---------------------|---------------------|-----------|----------------|
| 27989323    | MCP1           | rs7019112  | 23028336        | 9          | FLJ35282     | G                    | T                   | 0.213               | 0.047     | 7.12E-06       |
| 27989323    | MCP1           | rs7197349  | 78687219        | 16         | WVOX         | G                    | A                   | -0.097              | 0.021     | 2.62E-06       |
| 27989323    | MCP1           | rs7519506  | 158859138       | 1          | MNDA         | C                    | T                   | 0.099               | 0.019     | 2.44E-07       |
| <b>PMID</b> | <b>Protein</b> | <b>SNP</b> | <b>Position</b> | <b>Chr</b> | <b>Locus</b> | <b>Effect allele</b> | <b>Other allele</b> | <b>Effect size*</b> | <b>SE</b> | <b>p-value</b> |
| 27989323    | MCP1           | rs75265958 | 45758020        | 3          | SACM1L       | G                    | T                   | -0.123              | 0.027     | 5.16E-06       |
| 27989323    | MCP1           | rs7527322  | 159579533       | 1          | APCS         | G                    | A                   | 0.081               | 0.017     | 1.54E-06       |
| 27989323    | MCP1           | rs75826707 | 45908859        | 3          | CCR9         | G                    | A                   | -0.168              | 0.037     | 5.51E-06       |
| 27989323    | MCP1           | rs78629618 | 46880130        | 3          | PRSS42       | C                    | T                   | -0.119              | 0.026     | 4.23E-06       |

\*Mean difference in the standardised concentration of protein biomarker per allele.

For PMID 31208196, protein SNPs were selected from a meta-analysis of proteomics GWAS in CEU. For each biomarker, common SNPs (MAF>0.01) with a combined  $p$ -value below 0.01 were retained. Beta coefficients (i.e. effect size) for these SNPs were not reported in this paper so the coefficients were extracted from the INTERVAL study (the largest GWAS for TWEAK: Sun BB, Maranville JC, Peters JE, Stacey D, Staley JR, Blackshaw J, et al. Genomic atlas of the human plasma proteome. *Nature*. 2018(7708);558:73-79).

**eTable 13. Selected proteins, data sources, and calculation in meta-analysis and two-sample Mendelian randomisation**

| Selected proteins                                                                                                                                               | Data sources                                                                                                                                                                                                                                                                                                                                                                                        | Calculation                                                                                                                                                                                                                                                                                                              |
|-----------------------------------------------------------------------------------------------------------------------------------------------------------------|-----------------------------------------------------------------------------------------------------------------------------------------------------------------------------------------------------------------------------------------------------------------------------------------------------------------------------------------------------------------------------------------------------|--------------------------------------------------------------------------------------------------------------------------------------------------------------------------------------------------------------------------------------------------------------------------------------------------------------------------|
| <b>Analysis 1. MR: BMI and proteins</b>                                                                                                                         |                                                                                                                                                                                                                                                                                                                                                                                                     |                                                                                                                                                                                                                                                                                                                          |
| 7 proteins causally associated with BMI or observationally associated with CVD in CKB and have available GWAS (IL6, IL18, MCP1, MCP3, TRAIL, TWEAK, and HGF)    | 1) BMI GWAS: GIANT consortium + UKB (0.32 million European individuals), 670 SNPs <sup>17</sup><br>2) 3 proteomics GWAS <sup>8-11</sup> : Ahola-Olli (48 proteins, 8293 European individuals), Folkersen (83 proteins, 3394 European individuals), Sun (1104 proteins, 3301 European individuals)                                                                                                   | For each protein, a conventional inverse-variance weighted (IVW) MR analysis was done by linear regression of the SNP-protein associations on the SNP-BMI associations, with the y-axis intercept forced through the origin. Instruments for BMI are shown in <b>eFigure 1</b> and <b>eTable 4</b> .                     |
| <b>Analysis 2. OB: proteins and CVD</b>                                                                                                                         |                                                                                                                                                                                                                                                                                                                                                                                                     |                                                                                                                                                                                                                                                                                                                          |
| 7 proteins as in <i>Analysis 1</i>                                                                                                                              | Pubmed search: “cardiovascular disease”, “coronary heart disease”, “myocardial infarction”, “stroke”, “risk”, “IL6”, “IL18”, “MCP1”, “MCP3”, “TRAIL”, “TWEAK”, and “HGF” (restricting to studies in English published in the past 10 years up until March 1, 2019)                                                                                                                                  | A pooled RR of CVD per 1-SD higher protein was calculated for each protein separately using a fixed-effect meta-analysis.                                                                                                                                                                                                |
| <b>Analysis 3. MR: proteins and CVD</b>                                                                                                                         |                                                                                                                                                                                                                                                                                                                                                                                                     |                                                                                                                                                                                                                                                                                                                          |
| 4 proteins causally associated with BMI or observationally associated with CVD in CKB and had available instruments (no instruments available for IL6 and MCP3) | 1) 4 proteomics GWAS <sup>8-11</sup> : Ahola-Olli (48 proteins, 8293 European individuals), Folkersen (83 proteins, 3394 European individuals), Sjaarda (227 proteins, 4147 mostly European individuals), Sun (1104 proteins, 3301 European individuals)<br>2) CVD GWAS <sup>14,16</sup> : CARDIoGRAMplusC4D (60,801 cases and 123,504 controls) and MEGASTROKE (67,162 cases and 454,450 controls) | For each protein, a conventional IVW MR analysis was done by logistic regression of the SNP-disease associations on the SNP-protein associations, with the y-axis intercept forced through the origin. Instruments for proteins are shown in <b>eTable 12</b> . Separate analysis was done for CHD and ischaemic stroke. |

Analysis 2: Inclusion criteria were prospective cohort studies, nested case-control studies, or case-subcohort studies reporting the association between plasma proteins and CVD incidence or mortality. Bibliographies of included studies and related reviews were manually searched for additional eligible articles. No observational studies were identified for TRAIL and TWEAK.

Analysis 3: Two proteins (IL6 and MCP3) were not included in the two-sample Mendelian randomisation analysis because no instruments were available. In the main analysis, SNPs were included if they were in *cis* loci and were not in linkage disequilibrium. In the sensitivity analysis, SNPs on *trans* loci were also included.
